# Supplementary material
Source: Springer Nature journal article supplement (https://www.springermedizin.de/resource/supplementary/12881_2007_277_MOESM1_ESM.pdf/9452794)
Supplement: MOESM1 [file 9452794]

Online Table 1: Phenotypes Evaluated for Association using Population-based Analysis (GEE)

| Group | Category  | Trait Label   | Name                                                                    | GEE Link                                                                                                                                                            |
|-------|-----------|---------------|-------------------------------------------------------------------------|---------------------------------------------------------------------------------------------------------------------------------------------------------------------|
| Aging | BoneAging | BUA           | Bone Ultrasound attenuation measured by QUS, multivariable adjusted     | <a href="http://www.ncbi.nlm.nih.gov/projects/gap/cgi-bin/analysis.cgi?id=pha001754">http://www.ncbi.nlm.nih.gov/projects/gap/cgi-bin/analysis.cgi?id=pha001754</a> |
| Aging | BoneAging | deltaOSSR     | Bone age by osseographic scoring system, multivariable adjusted         | <a href="http://www.ncbi.nlm.nih.gov/projects/gap/cgi-bin/analysis.cgi?id=pha001788">http://www.ncbi.nlm.nih.gov/projects/gap/cgi-bin/analysis.cgi?id=pha001788</a> |
| Aging | BoneAging | deltaOSSrf    | Bone age by osseographic scoring system (Women), multivariable adjusted | <a href="http://www.ncbi.nlm.nih.gov/projects/gap/cgi-bin/analysis.cgi?id=pha001790">http://www.ncbi.nlm.nih.gov/projects/gap/cgi-bin/analysis.cgi?id=pha001790</a> |
| Aging | BoneAging | deltaOSSrm    | Bone age by osseographic scoring system (Men, multivariable adjusted)   | <a href="http://www.ncbi.nlm.nih.gov/projects/gap/cgi-bin/analysis.cgi?id=pha001792">http://www.ncbi.nlm.nih.gov/projects/gap/cgi-bin/analysis.cgi?id=pha001792</a> |
| Aging | BoneAging | FNBMd         | Femoral Neck BMD measured by DXA, multivariable adjusted                | <a href="http://www.ncbi.nlm.nih.gov/projects/gap/cgi-bin/analysis.cgi?id=pha001756">http://www.ncbi.nlm.nih.gov/projects/gap/cgi-bin/analysis.cgi?id=pha001756</a> |
| Aging | BoneAging | FNBMdf        | Femoral Neck BMD measured by DXA (Women), multivariable adjusted        | <a href="http://www.ncbi.nlm.nih.gov/projects/gap/cgi-bin/analysis.cgi?id=pha001794">http://www.ncbi.nlm.nih.gov/projects/gap/cgi-bin/analysis.cgi?id=pha001794</a> |
| Aging | BoneAging | FNBMdm        | Femoral Neck BMD measured by DXA (Men), multivariable adjusted          | <a href="http://www.ncbi.nlm.nih.gov/projects/gap/cgi-bin/analysis.cgi?id=pha001796">http://www.ncbi.nlm.nih.gov/projects/gap/cgi-bin/analysis.cgi?id=pha001796</a> |
| Aging | BoneAging | ITAvgBR1rf    | Hip geometry (IT BucklingRatio, Women), multivariable adjusted          | <a href="http://www.ncbi.nlm.nih.gov/projects/gap/cgi-bin/analysis.cgi?id=pha001798">http://www.ncbi.nlm.nih.gov/projects/gap/cgi-bin/analysis.cgi?id=pha001798</a> |
| Aging | BoneAging | ITAvgBR1rm    | Hip geometry (IT BucklingRatio, Men), multivariable adjusted            | <a href="http://www.ncbi.nlm.nih.gov/projects/gap/cgi-bin/analysis.cgi?id=pha001800">http://www.ncbi.nlm.nih.gov/projects/gap/cgi-bin/analysis.cgi?id=pha001800</a> |
| Aging | BoneAging | ITAvgBRrf     | Hip geometry (IT BucklingRatio, Women), age- adjusted                   | <a href="http://www.ncbi.nlm.nih.gov/projects/gap/cgi-bin/analysis.cgi?id=pha001802">http://www.ncbi.nlm.nih.gov/projects/gap/cgi-bin/analysis.cgi?id=pha001802</a> |
| Aging | BoneAging | ITAvgBRrm     | Hip geometry (IT BucklingRatio, Men), age- adjusted                     | <a href="http://www.ncbi.nlm.nih.gov/projects/gap/cgi-bin/analysis.cgi?id=pha001804">http://www.ncbi.nlm.nih.gov/projects/gap/cgi-bin/analysis.cgi?id=pha001804</a> |
| Aging | BoneAging | LSBMD         | Lumbar Spine BMD measured by DXA, multivariable adjusted                | <a href="http://www.ncbi.nlm.nih.gov/projects/gap/cgi-bin/analysis.cgi?id=pha001758">http://www.ncbi.nlm.nih.gov/projects/gap/cgi-bin/analysis.cgi?id=pha001758</a> |
| Aging | BoneAging | LSBMDf        | Spine Neck BMD measured by DXA (Women), multivariable adjusted          | <a href="http://www.ncbi.nlm.nih.gov/projects/gap/cgi-bin/analysis.cgi?id=pha001818">http://www.ncbi.nlm.nih.gov/projects/gap/cgi-bin/analysis.cgi?id=pha001818</a> |
| Aging | BoneAging | LSBMDm        | Spine Neck BMD measured by DXA (Men), multivariable adjusted            | <a href="http://www.ncbi.nlm.nih.gov/projects/gap/cgi-bin/analysis.cgi?id=pha001820">http://www.ncbi.nlm.nih.gov/projects/gap/cgi-bin/analysis.cgi?id=pha001820</a> |
| Aging | BoneAging | NeckCSMI      | Hip geometry by DXA (Neck Moment of Inertia), age- and sex-adjusted     | <a href="http://www.ncbi.nlm.nih.gov/projects/gap/cgi-bin/analysis.cgi?id=pha001760">http://www.ncbi.nlm.nih.gov/projects/gap/cgi-bin/analysis.cgi?id=pha001760</a> |
| Aging | BoneAging | NeckCSMI1     | Hip geometry by DXA (Neck Moment of Inertia), multivariable adjusted    | <a href="http://www.ncbi.nlm.nih.gov/projects/gap/cgi-bin/analysis.cgi?id=pha001762">http://www.ncbi.nlm.nih.gov/projects/gap/cgi-bin/analysis.cgi?id=pha001762</a> |
| Aging | BoneAging | NeckLeng      | Hip geometry by DXA (Neck Length), age- and sex-adjusted                | <a href="http://www.ncbi.nlm.nih.gov/projects/gap/cgi-bin/analysis.cgi?id=pha001764">http://www.ncbi.nlm.nih.gov/projects/gap/cgi-bin/analysis.cgi?id=pha001764</a> |
| Aging | BoneAging | NeckLeng1     | Hip geometry by DXA (Neck Length), multivariable adjusted               | <a href="http://www.ncbi.nlm.nih.gov/projects/gap/cgi-bin/analysis.cgi?id=pha001766">http://www.ncbi.nlm.nih.gov/projects/gap/cgi-bin/analysis.cgi?id=pha001766</a> |
| Aging | BoneAging | NeckLengf     | Hip geometry (Neck Length, Women), multivariable adjusted               | <a href="http://www.ncbi.nlm.nih.gov/projects/gap/cgi-bin/analysis.cgi?id=pha001822">http://www.ncbi.nlm.nih.gov/projects/gap/cgi-bin/analysis.cgi?id=pha001822</a> |
| Aging | BoneAging | NeckLengm     | Hip geometry (Neck Length, Men), multivariable adjusted                 | <a href="http://www.ncbi.nlm.nih.gov/projects/gap/cgi-bin/analysis.cgi?id=pha001824">http://www.ncbi.nlm.nih.gov/projects/gap/cgi-bin/analysis.cgi?id=pha001824</a> |
| Aging | BoneAging | NeckW         | Hip geometry by DXA (Neck Width), age- and sex-adjusted                 | <a href="http://www.ncbi.nlm.nih.gov/projects/gap/cgi-bin/analysis.cgi?id=pha001768">http://www.ncbi.nlm.nih.gov/projects/gap/cgi-bin/analysis.cgi?id=pha001768</a> |
| Aging | BoneAging | NeckW1        | Hip geometry by DXA (Neck Width), multivariable adjusted                | <a href="http://www.ncbi.nlm.nih.gov/projects/gap/cgi-bin/analysis.cgi?id=pha001770">http://www.ncbi.nlm.nih.gov/projects/gap/cgi-bin/analysis.cgi?id=pha001770</a> |
| Aging | BoneAging | NeckW1rf      | Hip geometry (Neck Width, Women), multivariable adjusted                | <a href="http://www.ncbi.nlm.nih.gov/projects/gap/cgi-bin/analysis.cgi?id=pha001826">http://www.ncbi.nlm.nih.gov/projects/gap/cgi-bin/analysis.cgi?id=pha001826</a> |
| Aging | BoneAging | NeckW1rm      | Hip geometry (Neck Width, Men), multivariable adjusted                  | <a href="http://www.ncbi.nlm.nih.gov/projects/gap/cgi-bin/analysis.cgi?id=pha001828">http://www.ncbi.nlm.nih.gov/projects/gap/cgi-bin/analysis.cgi?id=pha001828</a> |
| Aging | BoneAging | NeckWrf       | Hip geometry (Neck Width, Women), age-adjusted                          | <a href="http://www.ncbi.nlm.nih.gov/projects/gap/cgi-bin/analysis.cgi?id=pha001830">http://www.ncbi.nlm.nih.gov/projects/gap/cgi-bin/analysis.cgi?id=pha001830</a> |
| Aging | BoneAging | NeckWrm       | Hip geometry (Neck Width, Men), age-adjusted                            | <a href="http://www.ncbi.nlm.nih.gov/projects/gap/cgi-bin/analysis.cgi?id=pha001832">http://www.ncbi.nlm.nih.gov/projects/gap/cgi-bin/analysis.cgi?id=pha001832</a> |
| Aging | BoneAging | NeckZ         | Hip geometry by DXA (Neck Section Modulus), age- and sex-adjusted       | <a href="http://www.ncbi.nlm.nih.gov/projects/gap/cgi-bin/analysis.cgi?id=pha001772">http://www.ncbi.nlm.nih.gov/projects/gap/cgi-bin/analysis.cgi?id=pha001772</a> |
| Aging | BoneAging | NeckZ1        | Hip geometry by DXA (Neck Section Modulus), multivariable adjusted      | <a href="http://www.ncbi.nlm.nih.gov/projects/gap/cgi-bin/analysis.cgi?id=pha001774">http://www.ncbi.nlm.nih.gov/projects/gap/cgi-bin/analysis.cgi?id=pha001774</a> |
| Aging | BoneAging | NeckZ1rf      | Hip geometry (Neck Section Modulus, Women), multivariable adjusted      | <a href="http://www.ncbi.nlm.nih.gov/projects/gap/cgi-bin/analysis.cgi?id=pha001834">http://www.ncbi.nlm.nih.gov/projects/gap/cgi-bin/analysis.cgi?id=pha001834</a> |
| Aging | BoneAging | NeckZ1rm      | Hip geometry (Neck Section Modulus, Men), multivariable adjusted        | <a href="http://www.ncbi.nlm.nih.gov/projects/gap/cgi-bin/analysis.cgi?id=pha001836">http://www.ncbi.nlm.nih.gov/projects/gap/cgi-bin/analysis.cgi?id=pha001836</a> |
| Aging | BoneAging | NeckZrf       | Hip geometry (Neck Section Modulus, Women), age-adjusted                | <a href="http://www.ncbi.nlm.nih.gov/projects/gap/cgi-bin/analysis.cgi?id=pha001838">http://www.ncbi.nlm.nih.gov/projects/gap/cgi-bin/analysis.cgi?id=pha001838</a> |
| Aging | BoneAging | NeckZrm       | Hip geometry (Neck Section Modulus, Men), age-adjusted                  | <a href="http://www.ncbi.nlm.nih.gov/projects/gap/cgi-bin/analysis.cgi?id=pha001840">http://www.ncbi.nlm.nih.gov/projects/gap/cgi-bin/analysis.cgi?id=pha001840</a> |
| Aging | BoneAging | NNAvgBR1rf    | Hip geometry (NN BucklingRatio, Women), multivariable adjusted          | <a href="http://www.ncbi.nlm.nih.gov/projects/gap/cgi-bin/analysis.cgi?id=pha001842">http://www.ncbi.nlm.nih.gov/projects/gap/cgi-bin/analysis.cgi?id=pha001842</a> |
| Aging | BoneAging | NNAvgBR1rm    | Hip geometry (NN BucklingRatio, Men), multivariable adjusted            | <a href="http://www.ncbi.nlm.nih.gov/projects/gap/cgi-bin/analysis.cgi?id=pha001844">http://www.ncbi.nlm.nih.gov/projects/gap/cgi-bin/analysis.cgi?id=pha001844</a> |
| Aging | BoneAging | NNAvgBRrf     | Hip geometry (NN BucklingRatio, Women), age-adjusted                    | <a href="http://www.ncbi.nlm.nih.gov/projects/gap/cgi-bin/analysis.cgi?id=pha001846">http://www.ncbi.nlm.nih.gov/projects/gap/cgi-bin/analysis.cgi?id=pha001846</a> |
| Aging | BoneAging | NNAvgBRrm     | Hip geometry (NN BucklingRatio, Men), age-adjusted                      | <a href="http://www.ncbi.nlm.nih.gov/projects/gap/cgi-bin/analysis.cgi?id=pha001848">http://www.ncbi.nlm.nih.gov/projects/gap/cgi-bin/analysis.cgi?id=pha001848</a> |
| Aging | BoneAging | NNCSMI1rf     | Hip geometry (Neck CSMI, Women), multivariable adjusted                 | <a href="http://www.ncbi.nlm.nih.gov/projects/gap/cgi-bin/analysis.cgi?id=pha001850">http://www.ncbi.nlm.nih.gov/projects/gap/cgi-bin/analysis.cgi?id=pha001850</a> |
| Aging | BoneAging | NNCSMI1rm     | Hip geometry (Neck CSMI, Men), multivariable adjusted                   | <a href="http://www.ncbi.nlm.nih.gov/projects/gap/cgi-bin/analysis.cgi?id=pha001852">http://www.ncbi.nlm.nih.gov/projects/gap/cgi-bin/analysis.cgi?id=pha001852</a> |
| Aging | BoneAging | NNCSMIrf      | Hip geometry (Neck CSMI, Women), age-adjusted                           | <a href="http://www.ncbi.nlm.nih.gov/projects/gap/cgi-bin/analysis.cgi?id=pha001854">http://www.ncbi.nlm.nih.gov/projects/gap/cgi-bin/analysis.cgi?id=pha001854</a> |
| Aging | BoneAging | NNCSMIrm      | Hip geometry (Neck CSMI, Men), age-adjusted                             | <a href="http://www.ncbi.nlm.nih.gov/projects/gap/cgi-bin/analysis.cgi?id=pha001856">http://www.ncbi.nlm.nih.gov/projects/gap/cgi-bin/analysis.cgi?id=pha001856</a> |
| Aging | BoneAging | NSA           | Hip geometry by DXA (Neck-Shaft Angle), age- and sex-adjusted           | <a href="http://www.ncbi.nlm.nih.gov/projects/gap/cgi-bin/analysis.cgi?id=pha001776">http://www.ncbi.nlm.nih.gov/projects/gap/cgi-bin/analysis.cgi?id=pha001776</a> |
| Aging | BoneAging | NSA1          | Hip geometry by DXA (Neck-Shaft Angle), multivariable adjusted          | <a href="http://www.ncbi.nlm.nih.gov/projects/gap/cgi-bin/analysis.cgi?id=pha001778">http://www.ncbi.nlm.nih.gov/projects/gap/cgi-bin/analysis.cgi?id=pha001778</a> |
| Aging | BoneAging | NSAf          | Hip geometry (Neck-Shaft Angle, Women), multivariable adjusted          | <a href="http://www.ncbi.nlm.nih.gov/projects/gap/cgi-bin/analysis.cgi?id=pha001858">http://www.ncbi.nlm.nih.gov/projects/gap/cgi-bin/analysis.cgi?id=pha001858</a> |
| Aging | BoneAging | NSAm          | Hip geometry (Neck-Shaft Angle, Men), multivariable adjusted            | <a href="http://www.ncbi.nlm.nih.gov/projects/gap/cgi-bin/analysis.cgi?id=pha001860">http://www.ncbi.nlm.nih.gov/projects/gap/cgi-bin/analysis.cgi?id=pha001860</a> |
| Aging | BoneAging | ShaftAvgBR1rf | Hip geometry (Shaft BucklingRatio, Women), multivariable adjusted       | <a href="http://www.ncbi.nlm.nih.gov/projects/gap/cgi-bin/analysis.cgi?id=pha001862">http://www.ncbi.nlm.nih.gov/projects/gap/cgi-bin/analysis.cgi?id=pha001862</a> |
| Aging | BoneAging | ShaftAvgBR1rm | Hip geometry (Shaft BucklingRatio, Men), multivariable adjusted         | <a href="http://www.ncbi.nlm.nih.gov/projects/gap/cgi-bin/analysis.cgi?id=pha001864">http://www.ncbi.nlm.nih.gov/projects/gap/cgi-bin/analysis.cgi?id=pha001864</a> |
| Aging | BoneAging | ShaftAvgBRrf  | Hip geometry (Shaft BucklingRatio, Women), age-adjusted                 | <a href="http://www.ncbi.nlm.nih.gov/projects/gap/cgi-bin/analysis.cgi?id=pha001866">http://www.ncbi.nlm.nih.gov/projects/gap/cgi-bin/analysis.cgi?id=pha001866</a> |
| Aging | BoneAging | ShaftAvgBRrm  | Hip geometry (Shaft BucklingRatio, Men), age-adjusted                   | <a href="http://www.ncbi.nlm.nih.gov/projects/gap/cgi-bin/analysis.cgi?id=pha001868">http://www.ncbi.nlm.nih.gov/projects/gap/cgi-bin/analysis.cgi?id=pha001868</a> |
| Aging | BoneAging | ShaftCSMI1r   | Hip geometry (Shaft CSMI), multivariable adjusted                       | <a href="http://www.ncbi.nlm.nih.gov/projects/gap/cgi-bin/analysis.cgi?id=pha001870">http://www.ncbi.nlm.nih.gov/projects/gap/cgi-bin/analysis.cgi?id=pha001870</a> |
| Aging | BoneAging | ShaftCSMI1rf  | Hip geometry (Shaft CSMI, Women), multivariable adjusted                | <a href="http://www.ncbi.nlm.nih.gov/projects/gap/cgi-bin/analysis.cgi?id=pha001872">http://www.ncbi.nlm.nih.gov/projects/gap/cgi-bin/analysis.cgi?id=pha001872</a> |
| Aging | BoneAging | ShaftCSMI1rm  | Hip geometry (Shaft CSMI, Men), multivariable adjusted                  | <a href="http://www.ncbi.nlm.nih.gov/projects/gap/cgi-bin/analysis.cgi?id=pha001874">http://www.ncbi.nlm.nih.gov/projects/gap/cgi-bin/analysis.cgi?id=pha001874</a> |
| Aging | BoneAging | ShaftW        | Hip geometry by DXA (Shaft Width), age- and sex-adjusted                | <a href="http://www.ncbi.nlm.nih.gov/projects/gap/cgi-bin/analysis.cgi?id=pha001876">http://www.ncbi.nlm.nih.gov/projects/gap/cgi-bin/analysis.cgi?id=pha001876</a> |
| Aging | BoneAging | ShaftW1       | Hip geometry by DXA (Shaft Width), multivariable adjusted               | <a href="http://www.ncbi.nlm.nih.gov/projects/gap/cgi-bin/analysis.cgi?id=pha001782">http://www.ncbi.nlm.nih.gov/projects/gap/cgi-bin/analysis.cgi?id=pha001782</a> |
| Aging | BoneAging | ShaftW1f      | Hip geometry (Shaft Width, Women), multivariable adjusted               | <a href="http://www.ncbi.nlm.nih.gov/projects/gap/cgi-bin/analysis.cgi?id=pha001876">http://www.ncbi.nlm.nih.gov/projects/gap/cgi-bin/analysis.cgi?id=pha001876</a> |
| Aging | BoneAging | ShaftW1m      | Hip geometry (Shaft Width, Men), multivariable adjusted                 | <a href="http://www.ncbi.nlm.nih.gov/projects/gap/cgi-bin/analysis.cgi?id=pha001878">http://www.ncbi.nlm.nih.gov/projects/gap/cgi-bin/analysis.cgi?id=pha001878</a> |

Online Table 1: Phenotypes Evaluated for Association using Population-based Analysis (GEE)

| Group | Category               | Trait Label        | Name                                                                                 | GEE Link                                                                                                                                                            |
|-------|------------------------|--------------------|--------------------------------------------------------------------------------------|---------------------------------------------------------------------------------------------------------------------------------------------------------------------|
| Aging | BoneAging              | ShaftWf            | Hip geometry (Shaft Width, Women), age-adjusted                                      | <a href="http://www.ncbi.nlm.nih.gov/projects/gap/cgi-bin/analysis.cgi?id=pha001880">http://www.ncbi.nlm.nih.gov/projects/gap/cgi-bin/analysis.cgi?id=pha001880</a> |
| Aging | BoneAging              | ShaftWm            | Hip geometry (Shaft Width, Men), age-adjusted                                        | <a href="http://www.ncbi.nlm.nih.gov/projects/gap/cgi-bin/analysis.cgi?id=pha001882">http://www.ncbi.nlm.nih.gov/projects/gap/cgi-bin/analysis.cgi?id=pha001882</a> |
| Aging | BoneAging              | ShaftZ1R           | Hip geometry (Shaft Section Modulus), multivariable adjusted                         | <a href="http://www.ncbi.nlm.nih.gov/projects/gap/cgi-bin/analysis.cgi?id=pha001884">http://www.ncbi.nlm.nih.gov/projects/gap/cgi-bin/analysis.cgi?id=pha001884</a> |
| Aging | BoneAging              | ShaftZ1rf          | Hip geometry (Shaft Section Modulus, Women), multivariable adjusted                  | <a href="http://www.ncbi.nlm.nih.gov/projects/gap/cgi-bin/analysis.cgi?id=pha001886">http://www.ncbi.nlm.nih.gov/projects/gap/cgi-bin/analysis.cgi?id=pha001886</a> |
| Aging | BoneAging              | ShaftZ1rm          | Hip geometry (Shaft Section Modulus, Men), multivariable adjusted                    | <a href="http://www.ncbi.nlm.nih.gov/projects/gap/cgi-bin/analysis.cgi?id=pha001888">http://www.ncbi.nlm.nih.gov/projects/gap/cgi-bin/analysis.cgi?id=pha001888</a> |
| Aging | BoneAging              | SOS                | Bone Ultrasound speed measured by QUS, multivariable adjusted                        | <a href="http://www.ncbi.nlm.nih.gov/projects/gap/cgi-bin/analysis.cgi?id=pha001784">http://www.ncbi.nlm.nih.gov/projects/gap/cgi-bin/analysis.cgi?id=pha001784</a> |
| Aging | BoneAging              | TRBMD              | Trochanter BMD measured by DXA, multivariable adjusted                               | <a href="http://www.ncbi.nlm.nih.gov/projects/gap/cgi-bin/analysis.cgi?id=pha001786">http://www.ncbi.nlm.nih.gov/projects/gap/cgi-bin/analysis.cgi?id=pha001786</a> |
| Aging | BoneAging              | TRBMDf             | Troch Neck BMD measured by DXA (Women), multivariable adjusted                       | <a href="http://www.ncbi.nlm.nih.gov/projects/gap/cgi-bin/analysis.cgi?id=pha001890">http://www.ncbi.nlm.nih.gov/projects/gap/cgi-bin/analysis.cgi?id=pha001890</a> |
| Aging | BoneAging              | TRBMDm             | Troch Neck BMD measured by DXA (Men), multivariable adjusted                         | <a href="http://www.ncbi.nlm.nih.gov/projects/gap/cgi-bin/analysis.cgi?id=pha001892">http://www.ncbi.nlm.nih.gov/projects/gap/cgi-bin/analysis.cgi?id=pha001892</a> |
| Aging | BrainMRI               | AFBV               | Frontal lobe to intracranial volume ratio, multivariable adjusted                    | <a href="http://www.ncbi.nlm.nih.gov/projects/gap/cgi-bin/analysis.cgi?id=pha001894">http://www.ncbi.nlm.nih.gov/projects/gap/cgi-bin/analysis.cgi?id=pha001894</a> |
| Aging | BrainMRI               | AHPV               | Hippocampal to intracranial volume ratio, multivariable adjusted                     | <a href="http://www.ncbi.nlm.nih.gov/projects/gap/cgi-bin/analysis.cgi?id=pha001896">http://www.ncbi.nlm.nih.gov/projects/gap/cgi-bin/analysis.cgi?id=pha001896</a> |
| Aging | BrainMRI               | AHPVapoe1          | Hippocampal to intracranial volume ratio, multivariable with APOE                    | <a href="http://www.ncbi.nlm.nih.gov/projects/gap/cgi-bin/analysis.cgi?id=pha001930">http://www.ncbi.nlm.nih.gov/projects/gap/cgi-bin/analysis.cgi?id=pha001930</a> |
| Aging | BrainMRI               | AHPVr              | Hippocampal to total cerebral volume ratio, multivariable adjusted                   | <a href="http://www.ncbi.nlm.nih.gov/projects/gap/cgi-bin/analysis.cgi?id=pha001898">http://www.ncbi.nlm.nih.gov/projects/gap/cgi-bin/analysis.cgi?id=pha001898</a> |
| Aging | BrainMRI               | AHPVrapoe1         | Hippocampal to total cerebral volume ratio, multivariable with APOE                  | <a href="http://www.ncbi.nlm.nih.gov/projects/gap/cgi-bin/analysis.cgi?id=pha001932">http://www.ncbi.nlm.nih.gov/projects/gap/cgi-bin/analysis.cgi?id=pha001932</a> |
| Aging | BrainMRI               | ALLV               | Log lateral ventricular to intracranial volume ratio, multivariable adjusted         | <a href="http://www.ncbi.nlm.nih.gov/projects/gap/cgi-bin/analysis.cgi?id=pha001900">http://www.ncbi.nlm.nih.gov/projects/gap/cgi-bin/analysis.cgi?id=pha001900</a> |
| Aging | BrainMRI               | ALTHBV             | Log temporal horn to intracranial volume ratio, multivariable adjusted               | <a href="http://www.ncbi.nlm.nih.gov/projects/gap/cgi-bin/analysis.cgi?id=pha001902">http://www.ncbi.nlm.nih.gov/projects/gap/cgi-bin/analysis.cgi?id=pha001902</a> |
| Aging | BrainMRI               | ALWMHIVapoe1       | Log white matter hyperintensity to cranial ratio, multivariable with APOE            | <a href="http://www.ncbi.nlm.nih.gov/projects/gap/cgi-bin/analysis.cgi?id=pha001934">http://www.ncbi.nlm.nih.gov/projects/gap/cgi-bin/analysis.cgi?id=pha001934</a> |
| Aging | BrainMRI               | AOBV               | Occipital lobe to intracranial volume ratio, multivariable adjusted                  | <a href="http://www.ncbi.nlm.nih.gov/projects/gap/cgi-bin/analysis.cgi?id=pha001904">http://www.ncbi.nlm.nih.gov/projects/gap/cgi-bin/analysis.cgi?id=pha001904</a> |
| Aging | BrainMRI               | APBV               | Parietal lobe to intracranial volume ratio, multivariable adjusted                   | <a href="http://www.ncbi.nlm.nih.gov/projects/gap/cgi-bin/analysis.cgi?id=pha001906">http://www.ncbi.nlm.nih.gov/projects/gap/cgi-bin/analysis.cgi?id=pha001906</a> |
| Aging | BrainMRI               | ATBV               | Temporal lobe to intracranial volume ratio, multivariable adjusted                   | <a href="http://www.ncbi.nlm.nih.gov/projects/gap/cgi-bin/analysis.cgi?id=pha001908">http://www.ncbi.nlm.nih.gov/projects/gap/cgi-bin/analysis.cgi?id=pha001908</a> |
| Aging | BrainMRI               | ATCBV              | Total cerebral brain to intracranial volume ratio, multivariable adjusted            | <a href="http://www.ncbi.nlm.nih.gov/projects/gap/cgi-bin/analysis.cgi?id=pha001910">http://www.ncbi.nlm.nih.gov/projects/gap/cgi-bin/analysis.cgi?id=pha001910</a> |
| Aging | BrainMRI               | ATCBVapoe1         | Total cerebral brain to intracranial volume ratio, multivariable with APOE           | <a href="http://www.ncbi.nlm.nih.gov/projects/gap/cgi-bin/analysis.cgi?id=pha001936">http://www.ncbi.nlm.nih.gov/projects/gap/cgi-bin/analysis.cgi?id=pha001936</a> |
| Aging | BrainMRI               | CFBV               | Frontal lobe to intracranial volume ratio, age and sex adjusted                      | <a href="http://www.ncbi.nlm.nih.gov/projects/gap/cgi-bin/analysis.cgi?id=pha001912">http://www.ncbi.nlm.nih.gov/projects/gap/cgi-bin/analysis.cgi?id=pha001912</a> |
| Aging | BrainMRI               | CHPV               | Hippocampal to intracranial volume ratio, age and sex adjusted                       | <a href="http://www.ncbi.nlm.nih.gov/projects/gap/cgi-bin/analysis.cgi?id=pha001914">http://www.ncbi.nlm.nih.gov/projects/gap/cgi-bin/analysis.cgi?id=pha001914</a> |
| Aging | BrainMRI               | CHPVr              | Hippocampal to total cerebral volume ratio, age and sex adjusted                     | <a href="http://www.ncbi.nlm.nih.gov/projects/gap/cgi-bin/analysis.cgi?id=pha001916">http://www.ncbi.nlm.nih.gov/projects/gap/cgi-bin/analysis.cgi?id=pha001916</a> |
| Aging | BrainMRI               | CLLV               | Log lateral ventricular to intracranial volume ratio, age and sex adjusted           | <a href="http://www.ncbi.nlm.nih.gov/projects/gap/cgi-bin/analysis.cgi?id=pha001918">http://www.ncbi.nlm.nih.gov/projects/gap/cgi-bin/analysis.cgi?id=pha001918</a> |
| Aging | BrainMRI               | CLTHBV             | Log temporal horn to intracranial volume ratio, age and sex adjusted                 | <a href="http://www.ncbi.nlm.nih.gov/projects/gap/cgi-bin/analysis.cgi?id=pha001920">http://www.ncbi.nlm.nih.gov/projects/gap/cgi-bin/analysis.cgi?id=pha001920</a> |
| Aging | BrainMRI               | COBV               | Occipital lobe to intracranial volume ratio, age and sex adjusted                    | <a href="http://www.ncbi.nlm.nih.gov/projects/gap/cgi-bin/analysis.cgi?id=pha001922">http://www.ncbi.nlm.nih.gov/projects/gap/cgi-bin/analysis.cgi?id=pha001922</a> |
| Aging | BrainMRI               | CPBV               | Parietal lobe to intracranial volume ratio, age and sex adjusted                     | <a href="http://www.ncbi.nlm.nih.gov/projects/gap/cgi-bin/analysis.cgi?id=pha001924">http://www.ncbi.nlm.nih.gov/projects/gap/cgi-bin/analysis.cgi?id=pha001924</a> |
| Aging | BrainMRI               | CTBV               | Temporal lobe to intracranial volume ratio, age and sex adjusted                     | <a href="http://www.ncbi.nlm.nih.gov/projects/gap/cgi-bin/analysis.cgi?id=pha001926">http://www.ncbi.nlm.nih.gov/projects/gap/cgi-bin/analysis.cgi?id=pha001926</a> |
| Aging | BrainMRI               | CTCBV              | Total cerebral brain to intracranial volume ratio, age and sex adjusted              | <a href="http://www.ncbi.nlm.nih.gov/projects/gap/cgi-bin/analysis.cgi?id=pha001928">http://www.ncbi.nlm.nih.gov/projects/gap/cgi-bin/analysis.cgi?id=pha001928</a> |
| Aging | CognitiveFunction      | F1                 | Visual memory composite score, multivariable adjusted                                | <a href="http://www.ncbi.nlm.nih.gov/projects/gap/cgi-bin/analysis.cgi?id=pha001938">http://www.ncbi.nlm.nih.gov/projects/gap/cgi-bin/analysis.cgi?id=pha001938</a> |
| Aging | CognitiveFunction      | F2                 | Visuospatial memory & organization, multivariable adjusted                           | <a href="http://www.ncbi.nlm.nih.gov/projects/gap/cgi-bin/analysis.cgi?id=pha001940">http://www.ncbi.nlm.nih.gov/projects/gap/cgi-bin/analysis.cgi?id=pha001940</a> |
| Aging | CognitiveFunction      | F3                 | Visual scanning & motor speed, multivariable adjusted                                | <a href="http://www.ncbi.nlm.nih.gov/projects/gap/cgi-bin/analysis.cgi?id=pha001942">http://www.ncbi.nlm.nih.gov/projects/gap/cgi-bin/analysis.cgi?id=pha001942</a> |
| Aging | CognitiveFunction      | MMSE5MVX           | MMSE score, offspring exam 5, multivariable- adjusted                                | <a href="http://www.ncbi.nlm.nih.gov/projects/gap/cgi-bin/analysis.cgi?id=pha001950">http://www.ncbi.nlm.nih.gov/projects/gap/cgi-bin/analysis.cgi?id=pha001950</a> |
| Aging | CognitiveFunction      | MMSE5to7MVX        | average MMSE score, offspring exams 5 & 7, multivariable-adjusted                    | <a href="http://www.ncbi.nlm.nih.gov/projects/gap/cgi-bin/analysis.cgi?id=pha001952">http://www.ncbi.nlm.nih.gov/projects/gap/cgi-bin/analysis.cgi?id=pha001952</a> |
| Aging | CognitiveFunction      | MMSE5to7X          | average MMSE score, offspring exam 5 & 7, age-adjusted                               | <a href="http://www.ncbi.nlm.nih.gov/projects/gap/cgi-bin/analysis.cgi?id=pha001954">http://www.ncbi.nlm.nih.gov/projects/gap/cgi-bin/analysis.cgi?id=pha001954</a> |
| Aging | CognitiveFunction      | MMSE5X             | MMSE score, offspring exam 5, age-adjusted                                           | <a href="http://www.ncbi.nlm.nih.gov/projects/gap/cgi-bin/analysis.cgi?id=pha001956">http://www.ncbi.nlm.nih.gov/projects/gap/cgi-bin/analysis.cgi?id=pha001956</a> |
| Aging | CognitiveFunction      | MMSE65MVX          | MMSE score at age 65, offspring & cohort pooled, multivariable-adjusted              | <a href="http://www.ncbi.nlm.nih.gov/projects/gap/cgi-bin/analysis.cgi?id=pha001958">http://www.ncbi.nlm.nih.gov/projects/gap/cgi-bin/analysis.cgi?id=pha001958</a> |
| Aging | CognitiveFunction      | MMSE65X            | MMSE score at age 65, offspring & cohort pooled, birth cohort-adjusted               | <a href="http://www.ncbi.nlm.nih.gov/projects/gap/cgi-bin/analysis.cgi?id=pha001960">http://www.ncbi.nlm.nih.gov/projects/gap/cgi-bin/analysis.cgi?id=pha001960</a> |
| Aging | CognitiveFunction      | MMSE7MV            | MMSE score, offspring exam 7, multivariable- adjusted                                | <a href="http://www.ncbi.nlm.nih.gov/projects/gap/cgi-bin/analysis.cgi?id=pha002837">http://www.ncbi.nlm.nih.gov/projects/gap/cgi-bin/analysis.cgi?id=pha002837</a> |
| Aging | CognitiveFunction      | MMSE7X             | MMSE score, offspring exam 7, age-adjusted                                           | <a href="http://www.ncbi.nlm.nih.gov/projects/gap/cgi-bin/analysis.cgi?id=pha001962">http://www.ncbi.nlm.nih.gov/projects/gap/cgi-bin/analysis.cgi?id=pha001962</a> |
| Aging | CognitiveFunction      | Nam                | Boston Naming Test score without cues, multivariable adjusted                        | <a href="http://www.ncbi.nlm.nih.gov/projects/gap/cgi-bin/analysis.cgi?id=pha001944">http://www.ncbi.nlm.nih.gov/projects/gap/cgi-bin/analysis.cgi?id=pha001944</a> |
| Aging | CognitiveFunction      | Sim                | Similarities raw score, multivariable adjusted                                       | <a href="http://www.ncbi.nlm.nih.gov/projects/gap/cgi-bin/analysis.cgi?id=pha001946">http://www.ncbi.nlm.nih.gov/projects/gap/cgi-bin/analysis.cgi?id=pha001946</a> |
| Aging | CognitiveFunction      | WRAT               | Wide Range Achievement Test, multivariable adjusted                                  | <a href="http://www.ncbi.nlm.nih.gov/projects/gap/cgi-bin/analysis.cgi?id=pha001948">http://www.ncbi.nlm.nih.gov/projects/gap/cgi-bin/analysis.cgi?id=pha001948</a> |
| Aging | Hearing                | SPTA               | Pure tone audiometry average over medium frequencies, age and sex adjusted           | <a href="http://www.ncbi.nlm.nih.gov/projects/gap/cgi-bin/analysis.cgi?id=pha001964">http://www.ncbi.nlm.nih.gov/projects/gap/cgi-bin/analysis.cgi?id=pha001964</a> |
| Aging | Hearing                | SPTAHI             | Pure tone audiometry average over high frequencies, age and sex adjusted             | <a href="http://www.ncbi.nlm.nih.gov/projects/gap/cgi-bin/analysis.cgi?id=pha001966">http://www.ncbi.nlm.nih.gov/projects/gap/cgi-bin/analysis.cgi?id=pha001966</a> |
| Aging | Hearing                | SPTALO             | Pure tone audiometry average over low frequencies, age and sex adjusted              | <a href="http://www.ncbi.nlm.nih.gov/projects/gap/cgi-bin/analysis.cgi?id=pha001968">http://www.ncbi.nlm.nih.gov/projects/gap/cgi-bin/analysis.cgi?id=pha001968</a> |
| Aging | Morbidity-freesurvival | Morbidityfree65MVX | morbidity-free survival at age 65, offspring & cohort pooled, multivariable-adjusted | <a href="http://www.ncbi.nlm.nih.gov/projects/gap/cgi-bin/analysis.cgi?id=pha001970">http://www.ncbi.nlm.nih.gov/projects/gap/cgi-bin/analysis.cgi?id=pha001970</a> |
| Aging | Morbidity-freesurvival | Morbidityfree65X   | morbidity-free survival at age 65, offspring & cohort pooled, birth cohort- adjusted | <a href="http://www.ncbi.nlm.nih.gov/projects/gap/cgi-bin/analysis.cgi?id=pha001972">http://www.ncbi.nlm.nih.gov/projects/gap/cgi-bin/analysis.cgi?id=pha001972</a> |
| Aging | PhysicalDisability     | Handgrip727X       | hand grip, offspring exam 7 & cohort exam 27                                         | <a href="http://www.ncbi.nlm.nih.gov/projects/gap/cgi-bin/analysis.cgi?id=pha001978">http://www.ncbi.nlm.nih.gov/projects/gap/cgi-bin/analysis.cgi?id=pha001978</a> |
| Aging | PhysicalDisability     | Handgrip7X         | hand grip, offspring exam 7                                                          | <a href="http://www.ncbi.nlm.nih.gov/projects/gap/cgi-bin/analysis.cgi?id=pha001980">http://www.ncbi.nlm.nih.gov/projects/gap/cgi-bin/analysis.cgi?id=pha001980</a> |
| Aging | PhysicalDisability     | Walkingspeed727X   | walking speed, offspring exam 7 & cohort exam 27                                     | <a href="http://www.ncbi.nlm.nih.gov/projects/gap/cgi-bin/analysis.cgi?id=pha001982">http://www.ncbi.nlm.nih.gov/projects/gap/cgi-bin/analysis.cgi?id=pha001982</a> |
| Aging | PhysicalDisability     | Walkingspeed7X     | walking speed, offspring exam 7                                                      | <a href="http://www.ncbi.nlm.nih.gov/projects/gap/cgi-bin/analysis.cgi?id=pha001984">http://www.ncbi.nlm.nih.gov/projects/gap/cgi-bin/analysis.cgi?id=pha001984</a> |
| Aging | ReproductiveTraits     | MenoageMVX         | age at natural menopause, adjusted                                                   | <a href="http://www.ncbi.nlm.nih.gov/projects/gap/cgi-bin/analysis.cgi?id=pha001986">http://www.ncbi.nlm.nih.gov/projects/gap/cgi-bin/analysis.cgi?id=pha001986</a> |

Online Table 1: Phenotypes Evaluated for Association using Population-based Analysis (GEE)

| Group         | Category           | Trait Label    | Name                                                                                  | GEE Link                                                                                                                                                            |
|---------------|--------------------|----------------|---------------------------------------------------------------------------------------|---------------------------------------------------------------------------------------------------------------------------------------------------------------------|
| Aging         | ReproductiveTraits | MenoageX       | age at natural menopause, crude                                                       | <a href="http://www.ncbi.nlm.nih.gov/projects/gap/cgi-bin/analysis.cgi?id=pha001988">http://www.ncbi.nlm.nih.gov/projects/gap/cgi-bin/analysis.cgi?id=pha001988</a> |
| Aging         | Survival           | DeathageMV     | age at death, offspring & cohort pooled, multivariable-adjusted                       | <a href="http://www.ncbi.nlm.nih.gov/projects/gap/cgi-bin/analysis.cgi?id=pha001990">http://www.ncbi.nlm.nih.gov/projects/gap/cgi-bin/analysis.cgi?id=pha001990</a> |
| Aging         | Survival           | DeathageX      | age at death, offspring & cohort pooled, adjusted for birth cohort                    | <a href="http://www.ncbi.nlm.nih.gov/projects/gap/cgi-bin/analysis.cgi?id=pha001992">http://www.ncbi.nlm.nih.gov/projects/gap/cgi-bin/analysis.cgi?id=pha001992</a> |
| Aging         | Survival           | DeathpastALEMV | death past average life expectancy, offspring & cohort pooled, multivariable-adjusted | <a href="http://www.ncbi.nlm.nih.gov/projects/gap/cgi-bin/analysis.cgi?id=pha001994">http://www.ncbi.nlm.nih.gov/projects/gap/cgi-bin/analysis.cgi?id=pha001994</a> |
| Aging         | Survival           | DeathpastALEX  | death past average life expectancy, offspring & cohort pooled, birth cohort adjusted  | <a href="http://www.ncbi.nlm.nih.gov/projects/gap/cgi-bin/analysis.cgi?id=pha001996">http://www.ncbi.nlm.nih.gov/projects/gap/cgi-bin/analysis.cgi?id=pha001996</a> |
| BloodPressure | Bloodpressure      | DBP17AVGIMPAS  | diastolic BP average age-sex-adjusted residual exams 1-7                              | <a href="http://www.ncbi.nlm.nih.gov/projects/gap/cgi-bin/analysis.cgi?id=pha001418">http://www.ncbi.nlm.nih.gov/projects/gap/cgi-bin/analysis.cgi?id=pha001418</a> |
| BloodPressure | Bloodpressure      | DBP17AVGIMPMV  | diastolic BP average multivariable-adjusted residual exams 1-7                        | <a href="http://www.ncbi.nlm.nih.gov/projects/gap/cgi-bin/analysis.cgi?id=pha001420">http://www.ncbi.nlm.nih.gov/projects/gap/cgi-bin/analysis.cgi?id=pha001420</a> |
| BloodPressure | Bloodpressure      | DBP1IMPMEANAS  | diastolic BP exam 1, age- sex- adjusted                                               | <a href="http://www.ncbi.nlm.nih.gov/projects/gap/cgi-bin/analysis.cgi?id=pha001422">http://www.ncbi.nlm.nih.gov/projects/gap/cgi-bin/analysis.cgi?id=pha001422</a> |
| BloodPressure | Bloodpressure      | DBP1IMPMEANMV  | diastolic BP exam 1, multivariable-adjusted                                           | <a href="http://www.ncbi.nlm.nih.gov/projects/gap/cgi-bin/analysis.cgi?id=pha001424">http://www.ncbi.nlm.nih.gov/projects/gap/cgi-bin/analysis.cgi?id=pha001424</a> |
| BloodPressure | Bloodpressure      | DBP2IMPMEANAS  | diastolic BP exam 2, age- sex- adjusted                                               | <a href="http://www.ncbi.nlm.nih.gov/projects/gap/cgi-bin/analysis.cgi?id=pha001426">http://www.ncbi.nlm.nih.gov/projects/gap/cgi-bin/analysis.cgi?id=pha001426</a> |
| BloodPressure | Bloodpressure      | DBP2IMPMEANMV  | diastolic BP exam 2, multivariable-adjusted                                           | <a href="http://www.ncbi.nlm.nih.gov/projects/gap/cgi-bin/analysis.cgi?id=pha001428">http://www.ncbi.nlm.nih.gov/projects/gap/cgi-bin/analysis.cgi?id=pha001428</a> |
| BloodPressure | Bloodpressure      | DBP3IMPMEANAS  | diastolic BP exam 3, age- sex- adjusted                                               | <a href="http://www.ncbi.nlm.nih.gov/projects/gap/cgi-bin/analysis.cgi?id=pha001430">http://www.ncbi.nlm.nih.gov/projects/gap/cgi-bin/analysis.cgi?id=pha001430</a> |
| BloodPressure | Bloodpressure      | DBP3IMPMEANMV  | diastolic BP exam 3, multivariable-adjusted                                           | <a href="http://www.ncbi.nlm.nih.gov/projects/gap/cgi-bin/analysis.cgi?id=pha001432">http://www.ncbi.nlm.nih.gov/projects/gap/cgi-bin/analysis.cgi?id=pha001432</a> |
| BloodPressure | Bloodpressure      | DBP4IMPMEANAS  | diastolic BP exam 4, age- sex- adjusted                                               | <a href="http://www.ncbi.nlm.nih.gov/projects/gap/cgi-bin/analysis.cgi?id=pha001434">http://www.ncbi.nlm.nih.gov/projects/gap/cgi-bin/analysis.cgi?id=pha001434</a> |
| BloodPressure | Bloodpressure      | DBP4IMPMEANMV  | diastolic BP exam 4, multivariable-adjusted                                           | <a href="http://www.ncbi.nlm.nih.gov/projects/gap/cgi-bin/analysis.cgi?id=pha001436">http://www.ncbi.nlm.nih.gov/projects/gap/cgi-bin/analysis.cgi?id=pha001436</a> |
| BloodPressure | Bloodpressure      | DBP5IMPMEANAS  | diastolic BP exam 5, age- sex- adjusted                                               | <a href="http://www.ncbi.nlm.nih.gov/projects/gap/cgi-bin/analysis.cgi?id=pha001438">http://www.ncbi.nlm.nih.gov/projects/gap/cgi-bin/analysis.cgi?id=pha001438</a> |
| BloodPressure | Bloodpressure      | DBP5IMPMEANMV  | diastolic BP exam 5, multivariable-adjusted                                           | <a href="http://www.ncbi.nlm.nih.gov/projects/gap/cgi-bin/analysis.cgi?id=pha001440">http://www.ncbi.nlm.nih.gov/projects/gap/cgi-bin/analysis.cgi?id=pha001440</a> |
| BloodPressure | Bloodpressure      | DBP6IMPMEANAS  | diastolic BP exam 6, age- sex- adjusted                                               | <a href="http://www.ncbi.nlm.nih.gov/projects/gap/cgi-bin/analysis.cgi?id=pha001442">http://www.ncbi.nlm.nih.gov/projects/gap/cgi-bin/analysis.cgi?id=pha001442</a> |
| BloodPressure | Bloodpressure      | DBP6IMPMEANMV  | diastolic BP exam 6, multivariable-adjusted                                           | <a href="http://www.ncbi.nlm.nih.gov/projects/gap/cgi-bin/analysis.cgi?id=pha001444">http://www.ncbi.nlm.nih.gov/projects/gap/cgi-bin/analysis.cgi?id=pha001444</a> |
| BloodPressure | Bloodpressure      | DBP7IMPMEANAS  | diastolic BP exam 7, age- sex- adjusted                                               | <a href="http://www.ncbi.nlm.nih.gov/projects/gap/cgi-bin/analysis.cgi?id=pha001446">http://www.ncbi.nlm.nih.gov/projects/gap/cgi-bin/analysis.cgi?id=pha001446</a> |
| BloodPressure | Bloodpressure      | DBP7IMPMEANMV  | diastolic BP exam 7, multivariable-adjusted                                           | <a href="http://www.ncbi.nlm.nih.gov/projects/gap/cgi-bin/analysis.cgi?id=pha001448">http://www.ncbi.nlm.nih.gov/projects/gap/cgi-bin/analysis.cgi?id=pha001448</a> |
| BloodPressure | Bloodpressure      | PP17AVGIMPAS   | pulse pressure average age-sex-adjusted residual exams 1-7                            | <a href="http://www.ncbi.nlm.nih.gov/projects/gap/cgi-bin/analysis.cgi?id=pha001450">http://www.ncbi.nlm.nih.gov/projects/gap/cgi-bin/analysis.cgi?id=pha001450</a> |
| BloodPressure | Bloodpressure      | PP17AVGIMPMV   | pulse pressure average multivariable-adjusted residual exams 1-7                      | <a href="http://www.ncbi.nlm.nih.gov/projects/gap/cgi-bin/analysis.cgi?id=pha001452">http://www.ncbi.nlm.nih.gov/projects/gap/cgi-bin/analysis.cgi?id=pha001452</a> |
| BloodPressure | Bloodpressure      | PP1IMPMEANAS   | pulse pressure exam 1, age- sex- adjusted                                             | <a href="http://www.ncbi.nlm.nih.gov/projects/gap/cgi-bin/analysis.cgi?id=pha001454">http://www.ncbi.nlm.nih.gov/projects/gap/cgi-bin/analysis.cgi?id=pha001454</a> |
| BloodPressure | Bloodpressure      | PP1IMPMEANMV   | pulse pressure exam 1, multivariable- adjusted                                        | <a href="http://www.ncbi.nlm.nih.gov/projects/gap/cgi-bin/analysis.cgi?id=pha001456">http://www.ncbi.nlm.nih.gov/projects/gap/cgi-bin/analysis.cgi?id=pha001456</a> |
| BloodPressure | Bloodpressure      | PP2IMPMEANAS   | pulse pressure exam 2, age- sex- adjusted                                             | <a href="http://www.ncbi.nlm.nih.gov/projects/gap/cgi-bin/analysis.cgi?id=pha001458">http://www.ncbi.nlm.nih.gov/projects/gap/cgi-bin/analysis.cgi?id=pha001458</a> |
| BloodPressure | Bloodpressure      | PP2IMPMEANMV   | pulse pressure exam 2, multivariable- adjusted                                        | <a href="http://www.ncbi.nlm.nih.gov/projects/gap/cgi-bin/analysis.cgi?id=pha001460">http://www.ncbi.nlm.nih.gov/projects/gap/cgi-bin/analysis.cgi?id=pha001460</a> |
| BloodPressure | Bloodpressure      | PP3IMPMEANAS   | pulse pressure exam 3, age- sex- adjusted                                             | <a href="http://www.ncbi.nlm.nih.gov/projects/gap/cgi-bin/analysis.cgi?id=pha001462">http://www.ncbi.nlm.nih.gov/projects/gap/cgi-bin/analysis.cgi?id=pha001462</a> |
| BloodPressure | Bloodpressure      | PP3IMPMEANMV   | pulse pressure exam 3, multivariable- adjusted                                        | <a href="http://www.ncbi.nlm.nih.gov/projects/gap/cgi-bin/analysis.cgi?id=pha001464">http://www.ncbi.nlm.nih.gov/projects/gap/cgi-bin/analysis.cgi?id=pha001464</a> |
| BloodPressure | Bloodpressure      | PP4IMPMEANAS   | pulse pressure exam 4, age- sex- adjusted                                             | <a href="http://www.ncbi.nlm.nih.gov/projects/gap/cgi-bin/analysis.cgi?id=pha001466">http://www.ncbi.nlm.nih.gov/projects/gap/cgi-bin/analysis.cgi?id=pha001466</a> |
| BloodPressure | Bloodpressure      | PP4IMPMEANMV   | pulse pressure exam 4, multivariable- adjusted                                        | <a href="http://www.ncbi.nlm.nih.gov/projects/gap/cgi-bin/analysis.cgi?id=pha001468">http://www.ncbi.nlm.nih.gov/projects/gap/cgi-bin/analysis.cgi?id=pha001468</a> |
| BloodPressure | Bloodpressure      | PP5IMPMEANAS   | pulse pressure exam 5, age- sex- adjusted                                             | <a href="http://www.ncbi.nlm.nih.gov/projects/gap/cgi-bin/analysis.cgi?id=pha001470">http://www.ncbi.nlm.nih.gov/projects/gap/cgi-bin/analysis.cgi?id=pha001470</a> |
| BloodPressure | Bloodpressure      | PP5IMPMEANMV   | pulse pressure exam 5, multivariable- adjusted                                        | <a href="http://www.ncbi.nlm.nih.gov/projects/gap/cgi-bin/analysis.cgi?id=pha001472">http://www.ncbi.nlm.nih.gov/projects/gap/cgi-bin/analysis.cgi?id=pha001472</a> |
| BloodPressure | Bloodpressure      | PP6IMPMEANAS   | pulse pressure exam 6, age- sex- adjusted                                             | <a href="http://www.ncbi.nlm.nih.gov/projects/gap/cgi-bin/analysis.cgi?id=pha001474">http://www.ncbi.nlm.nih.gov/projects/gap/cgi-bin/analysis.cgi?id=pha001474</a> |
| BloodPressure | Bloodpressure      | PP6IMPMEANMV   | pulse pressure exam 6, multivariable- adjusted                                        | <a href="http://www.ncbi.nlm.nih.gov/projects/gap/cgi-bin/analysis.cgi?id=pha001476">http://www.ncbi.nlm.nih.gov/projects/gap/cgi-bin/analysis.cgi?id=pha001476</a> |
| BloodPressure | Bloodpressure      | PP7IMPMEANAS   | pulse pressure exam 7, age- sex- adjusted                                             | <a href="http://www.ncbi.nlm.nih.gov/projects/gap/cgi-bin/analysis.cgi?id=pha001478">http://www.ncbi.nlm.nih.gov/projects/gap/cgi-bin/analysis.cgi?id=pha001478</a> |
| BloodPressure | Bloodpressure      | PP7IMPMEANMV   | pulse pressure exam 7, multivariable- adjusted                                        | <a href="http://www.ncbi.nlm.nih.gov/projects/gap/cgi-bin/analysis.cgi?id=pha001480">http://www.ncbi.nlm.nih.gov/projects/gap/cgi-bin/analysis.cgi?id=pha001480</a> |
| BloodPressure | Bloodpressure      | SBP17AVGIMPAS  | systolic BP average age-sex-adjusted residual exams 1-7                               | <a href="http://www.ncbi.nlm.nih.gov/projects/gap/cgi-bin/analysis.cgi?id=pha001482">http://www.ncbi.nlm.nih.gov/projects/gap/cgi-bin/analysis.cgi?id=pha001482</a> |
| BloodPressure | Bloodpressure      | SBP17AVGIMPMV  | systolic BP average multivariable-adjusted residual exams 1-7                         | <a href="http://www.ncbi.nlm.nih.gov/projects/gap/cgi-bin/analysis.cgi?id=pha001484">http://www.ncbi.nlm.nih.gov/projects/gap/cgi-bin/analysis.cgi?id=pha001484</a> |
| BloodPressure | Bloodpressure      | SBP1IMPMEANAS  | systolic BP exam 1, age- sex- adjusted                                                | <a href="http://www.ncbi.nlm.nih.gov/projects/gap/cgi-bin/analysis.cgi?id=pha001486">http://www.ncbi.nlm.nih.gov/projects/gap/cgi-bin/analysis.cgi?id=pha001486</a> |
| BloodPressure | Bloodpressure      | SBP1IMPMEANMV  | systolic BP exam 1, multivariable-adjusted                                            | <a href="http://www.ncbi.nlm.nih.gov/projects/gap/cgi-bin/analysis.cgi?id=pha001488">http://www.ncbi.nlm.nih.gov/projects/gap/cgi-bin/analysis.cgi?id=pha001488</a> |
| BloodPressure | Bloodpressure      | SBP2IMPMEANAS  | systolic BP exam 2, age- sex- adjusted                                                | <a href="http://www.ncbi.nlm.nih.gov/projects/gap/cgi-bin/analysis.cgi?id=pha001490">http://www.ncbi.nlm.nih.gov/projects/gap/cgi-bin/analysis.cgi?id=pha001490</a> |
| BloodPressure | Bloodpressure      | SBP2IMPMEANMV  | systolic BP exam 2, multivariable-adjusted                                            | <a href="http://www.ncbi.nlm.nih.gov/projects/gap/cgi-bin/analysis.cgi?id=pha001492">http://www.ncbi.nlm.nih.gov/projects/gap/cgi-bin/analysis.cgi?id=pha001492</a> |
| BloodPressure | Bloodpressure      | SBP3IMPMEANAS  | systolic BP exam 3, age- sex- adjusted                                                | <a href="http://www.ncbi.nlm.nih.gov/projects/gap/cgi-bin/analysis.cgi?id=pha001494">http://www.ncbi.nlm.nih.gov/projects/gap/cgi-bin/analysis.cgi?id=pha001494</a> |
| BloodPressure | Bloodpressure      | SBP3IMPMEANMV  | systolic BP exam 3, multivariable-adjusted                                            | <a href="http://www.ncbi.nlm.nih.gov/projects/gap/cgi-bin/analysis.cgi?id=pha001496">http://www.ncbi.nlm.nih.gov/projects/gap/cgi-bin/analysis.cgi?id=pha001496</a> |
| BloodPressure | Bloodpressure      | SBP4IMPMEANAS  | systolic BP exam 4, age- sex- adjusted                                                | <a href="http://www.ncbi.nlm.nih.gov/projects/gap/cgi-bin/analysis.cgi?id=pha001498">http://www.ncbi.nlm.nih.gov/projects/gap/cgi-bin/analysis.cgi?id=pha001498</a> |
| BloodPressure | Bloodpressure      | SBP4IMPMEANMV  | systolic BP exam 4, multivariable-adjusted                                            | <a href="http://www.ncbi.nlm.nih.gov/projects/gap/cgi-bin/analysis.cgi?id=pha001500">http://www.ncbi.nlm.nih.gov/projects/gap/cgi-bin/analysis.cgi?id=pha001500</a> |
| BloodPressure | Bloodpressure      | SBP5IMPMEANAS  | systolic BP exam 5, age- sex- adjusted                                                | <a href="http://www.ncbi.nlm.nih.gov/projects/gap/cgi-bin/analysis.cgi?id=pha001502">http://www.ncbi.nlm.nih.gov/projects/gap/cgi-bin/analysis.cgi?id=pha001502</a> |
| BloodPressure | Bloodpressure      | SBP5IMPMEANMV  | systolic BP exam 5, multivariable-adjusted                                            | <a href="http://www.ncbi.nlm.nih.gov/projects/gap/cgi-bin/analysis.cgi?id=pha001504">http://www.ncbi.nlm.nih.gov/projects/gap/cgi-bin/analysis.cgi?id=pha001504</a> |
| BloodPressure | Bloodpressure      | SBP6IMPMEANAS  | systolic BP exam 6, age- sex- adjusted                                                | <a href="http://www.ncbi.nlm.nih.gov/projects/gap/cgi-bin/analysis.cgi?id=pha001506">http://www.ncbi.nlm.nih.gov/projects/gap/cgi-bin/analysis.cgi?id=pha001506</a> |
| BloodPressure | Bloodpressure      | SBP6IMPMEANMV  | systolic BP exam 6, multivariable-adjusted                                            | <a href="http://www.ncbi.nlm.nih.gov/projects/gap/cgi-bin/analysis.cgi?id=pha001508">http://www.ncbi.nlm.nih.gov/projects/gap/cgi-bin/analysis.cgi?id=pha001508</a> |
| BloodPressure | Bloodpressure      | SBP7IMPMEANAS  | systolic BP exam 7, age- sex- adjusted                                                | <a href="http://www.ncbi.nlm.nih.gov/projects/gap/cgi-bin/analysis.cgi?id=pha001510">http://www.ncbi.nlm.nih.gov/projects/gap/cgi-bin/analysis.cgi?id=pha001510</a> |
| BloodPressure | Bloodpressure      | SBP7IMPMEANMV  | systolic BP exam 7, multivariable-adjusted                                            | <a href="http://www.ncbi.nlm.nih.gov/projects/gap/cgi-bin/analysis.cgi?id=pha001512">http://www.ncbi.nlm.nih.gov/projects/gap/cgi-bin/analysis.cgi?id=pha001512</a> |
| BloodPressure | echocardiography   | AOR26AVGAS     | M-mode Echo aortic root diastolic diameter, avg age-sex resid, exams 2,4,5,6          | <a href="http://www.ncbi.nlm.nih.gov/projects/gap/cgi-bin/analysis.cgi?id=pha001514">http://www.ncbi.nlm.nih.gov/projects/gap/cgi-bin/analysis.cgi?id=pha001514</a> |
| BloodPressure | echocardiography   | AOR26AVGMV     | M-mode Echo aortic root diastolic diameter, avg multivar resid, exams 2,4,5,6         | <a href="http://www.ncbi.nlm.nih.gov/projects/gap/cgi-bin/analysis.cgi?id=pha001516">http://www.ncbi.nlm.nih.gov/projects/gap/cgi-bin/analysis.cgi?id=pha001516</a> |



Online Table 1: Phenotypes Evaluated for Association using Population-based Analysis (GEE)

| Group         | Category            | Trait Label         | Name                                                                       | GEE Link                                                                                                                                                            |
|---------------|---------------------|---------------------|----------------------------------------------------------------------------|---------------------------------------------------------------------------------------------------------------------------------------------------------------------|
| BloodPressure | echocardiography    | LVM5MV              | M-mode Echo LV mass, exam 5, multivariable-adjusted                        | <a href="http://www.ncbi.nlm.nih.gov/projects/gap/cgi-bin/analysis.cgi?id=pha001628">http://www.ncbi.nlm.nih.gov/projects/gap/cgi-bin/analysis.cgi?id=pha001628</a> |
| BloodPressure | echocardiography    | LVM6AS              | M-mode Echo LV mass, exam 6, age-sex-adjusted                              | <a href="http://www.ncbi.nlm.nih.gov/projects/gap/cgi-bin/analysis.cgi?id=pha001630">http://www.ncbi.nlm.nih.gov/projects/gap/cgi-bin/analysis.cgi?id=pha001630</a> |
| BloodPressure | echocardiography    | LVM6MV              | M-mode Echo LV mass, exam 6, multivariable-adjusted                        | <a href="http://www.ncbi.nlm.nih.gov/projects/gap/cgi-bin/analysis.cgi?id=pha001632">http://www.ncbi.nlm.nih.gov/projects/gap/cgi-bin/analysis.cgi?id=pha001632</a> |
| BloodPressure | echocardiography    | LVWT26AVGAS         | M-mode Echo LV diastolic wall thickness, avg age-sex resid, exams 2,4,5,6  | <a href="http://www.ncbi.nlm.nih.gov/projects/gap/cgi-bin/analysis.cgi?id=pha001634">http://www.ncbi.nlm.nih.gov/projects/gap/cgi-bin/analysis.cgi?id=pha001634</a> |
| BloodPressure | echocardiography    | LVWT26AVGMV         | M-mode Echo LV diastolic wall thickness, avg multivar resid, exams 2,4,5,6 | <a href="http://www.ncbi.nlm.nih.gov/projects/gap/cgi-bin/analysis.cgi?id=pha001636">http://www.ncbi.nlm.nih.gov/projects/gap/cgi-bin/analysis.cgi?id=pha001636</a> |
| BloodPressure | echocardiography    | LVWT2AS             | M-mode Echo LV diastolic wall thickness, exam 2, age-sex-adjusted          | <a href="http://www.ncbi.nlm.nih.gov/projects/gap/cgi-bin/analysis.cgi?id=pha001638">http://www.ncbi.nlm.nih.gov/projects/gap/cgi-bin/analysis.cgi?id=pha001638</a> |
| BloodPressure | echocardiography    | LVWT2MV             | M-mode Echo LV diastolic wall thickness, exam 2, multivariable-adjusted    | <a href="http://www.ncbi.nlm.nih.gov/projects/gap/cgi-bin/analysis.cgi?id=pha001640">http://www.ncbi.nlm.nih.gov/projects/gap/cgi-bin/analysis.cgi?id=pha001640</a> |
| BloodPressure | echocardiography    | LVWT4AS             | M-mode Echo LV diastolic wall thickness, exam 4, age-sex-adjusted          | <a href="http://www.ncbi.nlm.nih.gov/projects/gap/cgi-bin/analysis.cgi?id=pha001642">http://www.ncbi.nlm.nih.gov/projects/gap/cgi-bin/analysis.cgi?id=pha001642</a> |
| BloodPressure | echocardiography    | LVWT4MV             | M-mode Echo LV diastolic wall thickness, exam 4, multivariable-adjusted    | <a href="http://www.ncbi.nlm.nih.gov/projects/gap/cgi-bin/analysis.cgi?id=pha001644">http://www.ncbi.nlm.nih.gov/projects/gap/cgi-bin/analysis.cgi?id=pha001644</a> |
| BloodPressure | echocardiography    | LVWT5AS             | M-mode Echo LV diastolic wall thickness, exam 5, age-sex-adjusted          | <a href="http://www.ncbi.nlm.nih.gov/projects/gap/cgi-bin/analysis.cgi?id=pha001646">http://www.ncbi.nlm.nih.gov/projects/gap/cgi-bin/analysis.cgi?id=pha001646</a> |
| BloodPressure | echocardiography    | LVWT5MV             | M-mode Echo LV diastolic wall thickness, exam 5, multivariable-adjusted    | <a href="http://www.ncbi.nlm.nih.gov/projects/gap/cgi-bin/analysis.cgi?id=pha001648">http://www.ncbi.nlm.nih.gov/projects/gap/cgi-bin/analysis.cgi?id=pha001648</a> |
| BloodPressure | echocardiography    | LVWT6AS             | M-mode Echo LV diastolic wall thickness, exam 6, age-sex-adjusted          | <a href="http://www.ncbi.nlm.nih.gov/projects/gap/cgi-bin/analysis.cgi?id=pha001650">http://www.ncbi.nlm.nih.gov/projects/gap/cgi-bin/analysis.cgi?id=pha001650</a> |
| BloodPressure | echocardiography    | LVWT6MV             | M-mode Echo LV diastolic wall thickness, exam 6, multivariable-adjusted    | <a href="http://www.ncbi.nlm.nih.gov/projects/gap/cgi-bin/analysis.cgi?id=pha001652">http://www.ncbi.nlm.nih.gov/projects/gap/cgi-bin/analysis.cgi?id=pha001652</a> |
| BloodPressure | Endothelialfunction | BASEFLOW7AS         | Brachial artery Baseline flow velocity, exam 7, age-sex-adjusted           | <a href="http://www.ncbi.nlm.nih.gov/projects/gap/cgi-bin/analysis.cgi?id=pha001654">http://www.ncbi.nlm.nih.gov/projects/gap/cgi-bin/analysis.cgi?id=pha001654</a> |
| BloodPressure | Endothelialfunction | BASEFLOW7MV         | Brachial artery Baseline flow velocity, exam 7, multivariable-adjusted     | <a href="http://www.ncbi.nlm.nih.gov/projects/gap/cgi-bin/analysis.cgi?id=pha001656">http://www.ncbi.nlm.nih.gov/projects/gap/cgi-bin/analysis.cgi?id=pha001656</a> |
| BloodPressure | Endothelialfunction | BASELINEDIAMETERAS7 | baseline brachial artery diameter, exam 7, age and sex-adjusted            | <a href="http://www.ncbi.nlm.nih.gov/projects/gap/cgi-bin/analysis.cgi?id=pha001658">http://www.ncbi.nlm.nih.gov/projects/gap/cgi-bin/analysis.cgi?id=pha001658</a> |
| BloodPressure | Endothelialfunction | BASELINEDIAMETERMV7 | baseline brachial artery diameter, exam 7, multivariable-adjusted          | <a href="http://www.ncbi.nlm.nih.gov/projects/gap/cgi-bin/analysis.cgi?id=pha001660">http://www.ncbi.nlm.nih.gov/projects/gap/cgi-bin/analysis.cgi?id=pha001660</a> |
| BloodPressure | Endothelialfunction | FMD7PCTAS           | Brachial artery Flow mediated dilation, exam 7, age-adjusted               | <a href="http://www.ncbi.nlm.nih.gov/projects/gap/cgi-bin/analysis.cgi?id=pha001662">http://www.ncbi.nlm.nih.gov/projects/gap/cgi-bin/analysis.cgi?id=pha001662</a> |
| BloodPressure | Endothelialfunction | FMD7PCTMV           | Brachial artery Flow mediated dilation, exam 7, multivariable-adjusted     | <a href="http://www.ncbi.nlm.nih.gov/projects/gap/cgi-bin/analysis.cgi?id=pha001664">http://www.ncbi.nlm.nih.gov/projects/gap/cgi-bin/analysis.cgi?id=pha001664</a> |
| BloodPressure | Endothelialfunction | HYPERFLOW7AS        | Brachial artery hyperemic flow velocity, exam 7, age-sex-adjusted          | <a href="http://www.ncbi.nlm.nih.gov/projects/gap/cgi-bin/analysis.cgi?id=pha001666">http://www.ncbi.nlm.nih.gov/projects/gap/cgi-bin/analysis.cgi?id=pha001666</a> |
| BloodPressure | Endothelialfunction | HYPERFLOW7MV        | Brachial artery hyperemic flow velocity, exam 7, multivariable-adjusted    | <a href="http://www.ncbi.nlm.nih.gov/projects/gap/cgi-bin/analysis.cgi?id=pha001668">http://www.ncbi.nlm.nih.gov/projects/gap/cgi-bin/analysis.cgi?id=pha001668</a> |
| BloodPressure | ExerciseTest        | ETT2DBPREC3AS       | Exercise recovery 3-min diastolic BP, exam 2, age-sex-adjusted             | <a href="http://www.ncbi.nlm.nih.gov/projects/gap/cgi-bin/analysis.cgi?id=pha001670">http://www.ncbi.nlm.nih.gov/projects/gap/cgi-bin/analysis.cgi?id=pha001670</a> |
| BloodPressure | ExerciseTest        | ETT2DBPREC3MV       | Exercise recovery 3-min diastolic BP, exam 2, multivariable-adjusted       | <a href="http://www.ncbi.nlm.nih.gov/projects/gap/cgi-bin/analysis.cgi?id=pha001672">http://www.ncbi.nlm.nih.gov/projects/gap/cgi-bin/analysis.cgi?id=pha001672</a> |
| BloodPressure | ExerciseTest        | ETT2DBPSTG2AS       | Exercise Stage 2 diastolic BP, exam 2, age-sex-adjusted                    | <a href="http://www.ncbi.nlm.nih.gov/projects/gap/cgi-bin/analysis.cgi?id=pha001674">http://www.ncbi.nlm.nih.gov/projects/gap/cgi-bin/analysis.cgi?id=pha001674</a> |
| BloodPressure | ExerciseTest        | ETT2DBPSTG2MV       | Exercise Stage 2 diastolic BP, exam 2, multivariable-adjusted              | <a href="http://www.ncbi.nlm.nih.gov/projects/gap/cgi-bin/analysis.cgi?id=pha001676">http://www.ncbi.nlm.nih.gov/projects/gap/cgi-bin/analysis.cgi?id=pha001676</a> |
| BloodPressure | ExerciseTest        | ETT2HRREC3AS        | Exercise recovery 3-min heart rate, exam 2, age-sex-adjusted               | <a href="http://www.ncbi.nlm.nih.gov/projects/gap/cgi-bin/analysis.cgi?id=pha001678">http://www.ncbi.nlm.nih.gov/projects/gap/cgi-bin/analysis.cgi?id=pha001678</a> |
| BloodPressure | ExerciseTest        | ETT2HRREC3MV        | Exercise recovery 3-min heart rate, exam 2, multivariable-adjusted         | <a href="http://www.ncbi.nlm.nih.gov/projects/gap/cgi-bin/analysis.cgi?id=pha001680">http://www.ncbi.nlm.nih.gov/projects/gap/cgi-bin/analysis.cgi?id=pha001680</a> |
| BloodPressure | ExerciseTest        | ETT2HRSTG2AS        | Exercise Stage 2 heart rate, exam 2, age-sex-adjusted                      | <a href="http://www.ncbi.nlm.nih.gov/projects/gap/cgi-bin/analysis.cgi?id=pha001682">http://www.ncbi.nlm.nih.gov/projects/gap/cgi-bin/analysis.cgi?id=pha001682</a> |
| BloodPressure | ExerciseTest        | ETT2HRSTG2MV        | Exercise Stage 2 heart rate, exam 2, multivariable-adjusted                | <a href="http://www.ncbi.nlm.nih.gov/projects/gap/cgi-bin/analysis.cgi?id=pha001684">http://www.ncbi.nlm.nih.gov/projects/gap/cgi-bin/analysis.cgi?id=pha001684</a> |
| BloodPressure | ExerciseTest        | ETT2SBPREC3AS       | Exercise recovery 3-min systolic BP, exam 2, age-sex-adjusted              | <a href="http://www.ncbi.nlm.nih.gov/projects/gap/cgi-bin/analysis.cgi?id=pha001686">http://www.ncbi.nlm.nih.gov/projects/gap/cgi-bin/analysis.cgi?id=pha001686</a> |
| BloodPressure | ExerciseTest        | ETT2SBPREC3MV       | Exercise recovery 3-min systolic BP, exam 2, multivariable-adjusted        | <a href="http://www.ncbi.nlm.nih.gov/projects/gap/cgi-bin/analysis.cgi?id=pha001688">http://www.ncbi.nlm.nih.gov/projects/gap/cgi-bin/analysis.cgi?id=pha001688</a> |
| BloodPressure | ExerciseTest        | ETT2SBPSTG2AS       | Exercise Stage 2 systolic BP, exam 2, age-sex-adjusted                     | <a href="http://www.ncbi.nlm.nih.gov/projects/gap/cgi-bin/analysis.cgi?id=pha001690">http://www.ncbi.nlm.nih.gov/projects/gap/cgi-bin/analysis.cgi?id=pha001690</a> |
| BloodPressure | ExerciseTest        | ETT2SBPSTG2MV       | Exercise Stage 2 systolic BP, exam 2, multivariable-adjusted               | <a href="http://www.ncbi.nlm.nih.gov/projects/gap/cgi-bin/analysis.cgi?id=pha001692">http://www.ncbi.nlm.nih.gov/projects/gap/cgi-bin/analysis.cgi?id=pha001692</a> |
| BloodPressure | tonometry           | AI7AS               | augmentation index, exam 7, age-sex-adjusted                               | <a href="http://www.ncbi.nlm.nih.gov/projects/gap/cgi-bin/analysis.cgi?id=pha001694">http://www.ncbi.nlm.nih.gov/projects/gap/cgi-bin/analysis.cgi?id=pha001694</a> |
| BloodPressure | tonometry           | AI7MV               | augmentation index, exam 7, multivariable-adjusted                         | <a href="http://www.ncbi.nlm.nih.gov/projects/gap/cgi-bin/analysis.cgi?id=pha001696">http://www.ncbi.nlm.nih.gov/projects/gap/cgi-bin/analysis.cgi?id=pha001696</a> |
| BloodPressure | tonometry           | CBPWV7AS            | carotid-brachial pulse wave velocity, exam 7, age-sex-adjusted             | <a href="http://www.ncbi.nlm.nih.gov/projects/gap/cgi-bin/analysis.cgi?id=pha001698">http://www.ncbi.nlm.nih.gov/projects/gap/cgi-bin/analysis.cgi?id=pha001698</a> |
| BloodPressure | tonometry           | CBPWV7MV            | carotid-brachial pulse wave velocity, exam 7, multivariable-adjusted       | <a href="http://www.ncbi.nlm.nih.gov/projects/gap/cgi-bin/analysis.cgi?id=pha001700">http://www.ncbi.nlm.nih.gov/projects/gap/cgi-bin/analysis.cgi?id=pha001700</a> |
| BloodPressure | tonometry           | CFPWV7AS            | carotid-femoral pulse wave velocity, exam 7, age-sex-adjusted              | <a href="http://www.ncbi.nlm.nih.gov/projects/gap/cgi-bin/analysis.cgi?id=pha001702">http://www.ncbi.nlm.nih.gov/projects/gap/cgi-bin/analysis.cgi?id=pha001702</a> |
| BloodPressure | tonometry           | CFPWV7MV            | carotid-femoral pulse wave velocity, exam 7, multivariable-adjusted        | <a href="http://www.ncbi.nlm.nih.gov/projects/gap/cgi-bin/analysis.cgi?id=pha001704">http://www.ncbi.nlm.nih.gov/projects/gap/cgi-bin/analysis.cgi?id=pha001704</a> |
| BloodPressure | tonometry           | CPP7AS              | central pulse pressure, exam 7, age-sex-adjusted                           | <a href="http://www.ncbi.nlm.nih.gov/projects/gap/cgi-bin/analysis.cgi?id=pha001706">http://www.ncbi.nlm.nih.gov/projects/gap/cgi-bin/analysis.cgi?id=pha001706</a> |
| BloodPressure | tonometry           | CPP7MV              | central pulse pressure, exam 7, multivariable-adjusted                     | <a href="http://www.ncbi.nlm.nih.gov/projects/gap/cgi-bin/analysis.cgi?id=pha001708">http://www.ncbi.nlm.nih.gov/projects/gap/cgi-bin/analysis.cgi?id=pha001708</a> |
| BloodPressure | tonometry           | CRPWV7AS            | carotid-radial pulse wave velocity, exam 7, age-sex-adjusted               | <a href="http://www.ncbi.nlm.nih.gov/projects/gap/cgi-bin/analysis.cgi?id=pha001710">http://www.ncbi.nlm.nih.gov/projects/gap/cgi-bin/analysis.cgi?id=pha001710</a> |
| BloodPressure | tonometry           | CRPWV7MV            | carotid-radial pulse wave velocity, exam 7, multivariable-adjusted         | <a href="http://www.ncbi.nlm.nih.gov/projects/gap/cgi-bin/analysis.cgi?id=pha001712">http://www.ncbi.nlm.nih.gov/projects/gap/cgi-bin/analysis.cgi?id=pha001712</a> |
| BloodPressure | tonometry           | DBP7BRAOSCAS        | Diastolic BP Brachial oscillometric, exam 7, age-sex-adjusted              | <a href="http://www.ncbi.nlm.nih.gov/projects/gap/cgi-bin/analysis.cgi?id=pha001714">http://www.ncbi.nlm.nih.gov/projects/gap/cgi-bin/analysis.cgi?id=pha001714</a> |
| BloodPressure | tonometry           | DBP7BRAOSCMV        | Diastolic BP Brachial oscillometric, exam 7, multivariable-adjusted        | <a href="http://www.ncbi.nlm.nih.gov/projects/gap/cgi-bin/analysis.cgi?id=pha001716">http://www.ncbi.nlm.nih.gov/projects/gap/cgi-bin/analysis.cgi?id=pha001716</a> |
| BloodPressure | tonometry           | FWDWAVE7AS          | forward wave amplitude, exam 7, age-sex-adjusted                           | <a href="http://www.ncbi.nlm.nih.gov/projects/gap/cgi-bin/analysis.cgi?id=pha001718">http://www.ncbi.nlm.nih.gov/projects/gap/cgi-bin/analysis.cgi?id=pha001718</a> |
| BloodPressure | tonometry           | FWDWAVE7MV          | forward wave amplitude, exam 7, multivariable-adjusted                     | <a href="http://www.ncbi.nlm.nih.gov/projects/gap/cgi-bin/analysis.cgi?id=pha001720">http://www.ncbi.nlm.nih.gov/projects/gap/cgi-bin/analysis.cgi?id=pha001720</a> |
| BloodPressure | tonometry           | INVCFPWV7AS         | LV ejection time, exam 7, age-sex-adjusted                                 | <a href="http://www.ncbi.nlm.nih.gov/projects/gap/cgi-bin/analysis.cgi?id=pha001722">http://www.ncbi.nlm.nih.gov/projects/gap/cgi-bin/analysis.cgi?id=pha001722</a> |
| BloodPressure | tonometry           | INVCFPWV7MV         | LV ejection time, exam 7, multivariable-adjusted                           | <a href="http://www.ncbi.nlm.nih.gov/projects/gap/cgi-bin/analysis.cgi?id=pha001724">http://www.ncbi.nlm.nih.gov/projects/gap/cgi-bin/analysis.cgi?id=pha001724</a> |
| BloodPressure | tonometry           | MAP7AS              | mean arterial pressure, exam 7, age-sex-adjusted                           | <a href="http://www.ncbi.nlm.nih.gov/projects/gap/cgi-bin/analysis.cgi?id=pha001726">http://www.ncbi.nlm.nih.gov/projects/gap/cgi-bin/analysis.cgi?id=pha001726</a> |
| BloodPressure | tonometry           | MAP7MV              | mean arterial pressure, exam 7, multivariable-adjusted                     | <a href="http://www.ncbi.nlm.nih.gov/projects/gap/cgi-bin/analysis.cgi?id=pha001728">http://www.ncbi.nlm.nih.gov/projects/gap/cgi-bin/analysis.cgi?id=pha001728</a> |
| BloodPressure | tonometry           | PERAMPAP7AS         | Peripheral amplification apparent, exam 7, age-sex-adjusted                | <a href="http://www.ncbi.nlm.nih.gov/projects/gap/cgi-bin/analysis.cgi?id=pha001730">http://www.ncbi.nlm.nih.gov/projects/gap/cgi-bin/analysis.cgi?id=pha001730</a> |
| BloodPressure | tonometry           | PERAMPAP7MV         | Peripheral amplification apparent, exam 7, multivariable-adjusted          | <a href="http://www.ncbi.nlm.nih.gov/projects/gap/cgi-bin/analysis.cgi?id=pha001732">http://www.ncbi.nlm.nih.gov/projects/gap/cgi-bin/analysis.cgi?id=pha001732</a> |
| BloodPressure | tonometry           | PERAMPTRU7AS        | Peripheral amplification true, exam 7, age-sex-adjusted                    | <a href="http://www.ncbi.nlm.nih.gov/projects/gap/cgi-bin/analysis.cgi?id=pha001734">http://www.ncbi.nlm.nih.gov/projects/gap/cgi-bin/analysis.cgi?id=pha001734</a> |
| BloodPressure | tonometry           | PERAMPTRU7MV        | Peripheral amplification true, exam 7, multivariable-adjusted              | <a href="http://www.ncbi.nlm.nih.gov/projects/gap/cgi-bin/analysis.cgi?id=pha001736">http://www.ncbi.nlm.nih.gov/projects/gap/cgi-bin/analysis.cgi?id=pha001736</a> |

Online Table 1: Phenotypes Evaluated for Association using Population-based Analysis (GEE)

| Group         | Category            | Trait Label     | Name                                                                       | GEE Link                                                                                                                                                            |
|---------------|---------------------|-----------------|----------------------------------------------------------------------------|---------------------------------------------------------------------------------------------------------------------------------------------------------------------|
| BloodPressure | tonometry           | PP7BRAOSCAS     | Pulse pressure Brachial oscillometric, exam 7, age-sex-adjusted            | <a href="http://www.ncbi.nlm.nih.gov/projects/gap/cgi-bin/analysis.cgi?id=pha001738">http://www.ncbi.nlm.nih.gov/projects/gap/cgi-bin/analysis.cgi?id=pha001738</a> |
| BloodPressure | tonometry           | PP7BRAOSCMV     | Pulse pressure Brachial oscillometric, exam 7, multivariable-adjusted      | <a href="http://www.ncbi.nlm.nih.gov/projects/gap/cgi-bin/analysis.cgi?id=pha001740">http://www.ncbi.nlm.nih.gov/projects/gap/cgi-bin/analysis.cgi?id=pha001740</a> |
| BloodPressure | tonometry           | REFWAVE7AS      | reflected wave amplitude, exam 7, age-sex-adjusted                         | <a href="http://www.ncbi.nlm.nih.gov/projects/gap/cgi-bin/analysis.cgi?id=pha001742">http://www.ncbi.nlm.nih.gov/projects/gap/cgi-bin/analysis.cgi?id=pha001742</a> |
| BloodPressure | tonometry           | REFWAVE7MV      | reflected wave amplitude, exam 7, multivariable-adjusted                   | <a href="http://www.ncbi.nlm.nih.gov/projects/gap/cgi-bin/analysis.cgi?id=pha001744">http://www.ncbi.nlm.nih.gov/projects/gap/cgi-bin/analysis.cgi?id=pha001744</a> |
| BloodPressure | tonometry           | RWTT7AS         | reflected wave transit time, exam 7, age-sex-adjusted                      | <a href="http://www.ncbi.nlm.nih.gov/projects/gap/cgi-bin/analysis.cgi?id=pha001746">http://www.ncbi.nlm.nih.gov/projects/gap/cgi-bin/analysis.cgi?id=pha001746</a> |
| BloodPressure | tonometry           | RWTT7MV         | reflected wave transit time, exam 7, multivariable-adjusted                | <a href="http://www.ncbi.nlm.nih.gov/projects/gap/cgi-bin/analysis.cgi?id=pha001748">http://www.ncbi.nlm.nih.gov/projects/gap/cgi-bin/analysis.cgi?id=pha001748</a> |
| BloodPressure | tonometry           | SBP7BRAOSCAS    | Systolic BP Brachial oscillometric, exam 7, age-sex-adjusted               | <a href="http://www.ncbi.nlm.nih.gov/projects/gap/cgi-bin/analysis.cgi?id=pha001750">http://www.ncbi.nlm.nih.gov/projects/gap/cgi-bin/analysis.cgi?id=pha001750</a> |
| BloodPressure | tonometry           | SBP7BRAOSCMV    | Systolic BP Brachial oscillometric, exam 7, multivariable-adjusted         | <a href="http://www.ncbi.nlm.nih.gov/projects/gap/cgi-bin/analysis.cgi?id=pha001752">http://www.ncbi.nlm.nih.gov/projects/gap/cgi-bin/analysis.cgi?id=pha001752</a> |
| CVDMiscTraits | Cancer              | ALLCANCER1      | all cancer, adjusted for age & sex                                         | <a href="http://www.ncbi.nlm.nih.gov/projects/gap/cgi-bin/analysis.cgi?id=pha001332">http://www.ncbi.nlm.nih.gov/projects/gap/cgi-bin/analysis.cgi?id=pha001332</a> |
| CVDMiscTraits | Cancer              | ALLCANCER2      | all cancer, fully adjusted                                                 | <a href="http://www.ncbi.nlm.nih.gov/projects/gap/cgi-bin/analysis.cgi?id=pha001334">http://www.ncbi.nlm.nih.gov/projects/gap/cgi-bin/analysis.cgi?id=pha001334</a> |
| CVDMiscTraits | Cancer              | BREASTCANCER1   | breast cancer (women only), age-adjusted                                   | <a href="http://www.ncbi.nlm.nih.gov/projects/gap/cgi-bin/analysis.cgi?id=pha001336">http://www.ncbi.nlm.nih.gov/projects/gap/cgi-bin/analysis.cgi?id=pha001336</a> |
| CVDMiscTraits | Cancer              | BREASTCANCER2   | breast cancer (women only), adjusted for age, parity, BMI at entry         | <a href="http://www.ncbi.nlm.nih.gov/projects/gap/cgi-bin/analysis.cgi?id=pha001338">http://www.ncbi.nlm.nih.gov/projects/gap/cgi-bin/analysis.cgi?id=pha001338</a> |
| CVDMiscTraits | Cancer              | PROSTATECANCER1 | prostate cancer, adjusted for age at entry                                 | <a href="http://www.ncbi.nlm.nih.gov/projects/gap/cgi-bin/analysis.cgi?id=pha001340">http://www.ncbi.nlm.nih.gov/projects/gap/cgi-bin/analysis.cgi?id=pha001340</a> |
| CVDMiscTraits | CVDbySOE            | AllatheroCVD1D  | Age- & sex- adjusted incident CHD, ABI, TIA, or IC                         | <a href="http://www.ncbi.nlm.nih.gov/projects/gap/cgi-bin/analysis.cgi?id=pha001342">http://www.ncbi.nlm.nih.gov/projects/gap/cgi-bin/analysis.cgi?id=pha001342</a> |
| CVDMiscTraits | CVDbySOE            | AllatheroCVD2D  | multivariable-adjusted incident CHD, ABI, TIA, or IC                       | <a href="http://www.ncbi.nlm.nih.gov/projects/gap/cgi-bin/analysis.cgi?id=pha001344">http://www.ncbi.nlm.nih.gov/projects/gap/cgi-bin/analysis.cgi?id=pha001344</a> |
| CVDMiscTraits | CVDbySOE            | AllCHD1D        | Age- & sex-adjusted incident MI, AP, CI, or CHD death                      | <a href="http://www.ncbi.nlm.nih.gov/projects/gap/cgi-bin/analysis.cgi?id=pha001346">http://www.ncbi.nlm.nih.gov/projects/gap/cgi-bin/analysis.cgi?id=pha001346</a> |
| CVDMiscTraits | CVDbySOE            | AllCHD2D        | multivariable-adjusted incident MI, AP, CI, or CHD death                   | <a href="http://www.ncbi.nlm.nih.gov/projects/gap/cgi-bin/analysis.cgi?id=pha001348">http://www.ncbi.nlm.nih.gov/projects/gap/cgi-bin/analysis.cgi?id=pha001348</a> |
| CVDMiscTraits | CVDbySOE            | AllCHF1D        | Age- & sex-adjusted incident heart failure (free of MI)                    | <a href="http://www.ncbi.nlm.nih.gov/projects/gap/cgi-bin/analysis.cgi?id=pha001350">http://www.ncbi.nlm.nih.gov/projects/gap/cgi-bin/analysis.cgi?id=pha001350</a> |
| CVDMiscTraits | CVDbySOE            | AllCHF2D        | multivariable-adjusted incident heart failure (free of MI)                 | <a href="http://www.ncbi.nlm.nih.gov/projects/gap/cgi-bin/analysis.cgi?id=pha001352">http://www.ncbi.nlm.nih.gov/projects/gap/cgi-bin/analysis.cgi?id=pha001352</a> |
| CVDMiscTraits | CVDbySOE            | HardatheroCVD1D | Age- & sex-adjusted incident MI, CI, CHD death, or ABI                     | <a href="http://www.ncbi.nlm.nih.gov/projects/gap/cgi-bin/analysis.cgi?id=pha001358">http://www.ncbi.nlm.nih.gov/projects/gap/cgi-bin/analysis.cgi?id=pha001358</a> |
| CVDMiscTraits | CVDbySOE            | HardatheroCVD2D | multivariable-adjusted incident MI, CI, CHD death, or ABI                  | <a href="http://www.ncbi.nlm.nih.gov/projects/gap/cgi-bin/analysis.cgi?id=pha001360">http://www.ncbi.nlm.nih.gov/projects/gap/cgi-bin/analysis.cgi?id=pha001360</a> |
| CVDMiscTraits | CVDbySOE            | HardCHD1D       | Age- & sex-adjusted incident MI, CI, or CHD death                          | <a href="http://www.ncbi.nlm.nih.gov/projects/gap/cgi-bin/analysis.cgi?id=pha001362">http://www.ncbi.nlm.nih.gov/projects/gap/cgi-bin/analysis.cgi?id=pha001362</a> |
| CVDMiscTraits | CVDbySOE            | HardCHD2D       | multivariable-adjusted incident MI, CI, or CHD death                       | <a href="http://www.ncbi.nlm.nih.gov/projects/gap/cgi-bin/analysis.cgi?id=pha001364">http://www.ncbi.nlm.nih.gov/projects/gap/cgi-bin/analysis.cgi?id=pha001364</a> |
| CVDMiscTraits | CVDbySOE            | NoMICHF1D       | Age- & sex-adjusted incident heart failure, censored at interval MI        | <a href="http://www.ncbi.nlm.nih.gov/projects/gap/cgi-bin/analysis.cgi?id=pha001366">http://www.ncbi.nlm.nih.gov/projects/gap/cgi-bin/analysis.cgi?id=pha001366</a> |
| CVDMiscTraits | CVDbySOE            | NoMICHF2D       | multivariable-adjusted incident heart failure, censored at interval MI     | <a href="http://www.ncbi.nlm.nih.gov/projects/gap/cgi-bin/analysis.cgi?id=pha001368">http://www.ncbi.nlm.nih.gov/projects/gap/cgi-bin/analysis.cgi?id=pha001368</a> |
| CVDMiscTraits | ECGtraits           | PRAdjRRPOOL     | Age & RR adjusted PR interval cohort ex 11 offspring ex 1                  | <a href="http://www.ncbi.nlm.nih.gov/projects/gap/cgi-bin/analysis.cgi?id=pha001370">http://www.ncbi.nlm.nih.gov/projects/gap/cgi-bin/analysis.cgi?id=pha001370</a> |
| CVDMiscTraits | ECGtraits           | QTmen           | Age & RR adjusted QT interval men cohort ex 11 offspring ex 1              | <a href="http://www.ncbi.nlm.nih.gov/projects/gap/cgi-bin/analysis.cgi?id=pha001372">http://www.ncbi.nlm.nih.gov/projects/gap/cgi-bin/analysis.cgi?id=pha001372</a> |
| CVDMiscTraits | ECGtraits           | QTPOOL          | Age & RR adjusted QT interval men & women cohort ex 11 offspring ex 1      | <a href="http://www.ncbi.nlm.nih.gov/projects/gap/cgi-bin/analysis.cgi?id=pha001374">http://www.ncbi.nlm.nih.gov/projects/gap/cgi-bin/analysis.cgi?id=pha001374</a> |
| CVDMiscTraits | ECGtraits           | QTWOMEN         | Age & RR adjusted QT interval women cohort ex 11 offspring ex 1            | <a href="http://www.ncbi.nlm.nih.gov/projects/gap/cgi-bin/analysis.cgi?id=pha001376">http://www.ncbi.nlm.nih.gov/projects/gap/cgi-bin/analysis.cgi?id=pha001376</a> |
| CVDMiscTraits | ECGtraits           | RRmen           | Age adjusted RR interval men cohort ex 11 offspring ex 1                   | <a href="http://www.ncbi.nlm.nih.gov/projects/gap/cgi-bin/analysis.cgi?id=pha001378">http://www.ncbi.nlm.nih.gov/projects/gap/cgi-bin/analysis.cgi?id=pha001378</a> |
| CVDMiscTraits | ECGtraits           | RRPOOL          | Age adjusted RR interval men & women cohort ex 11 offspring ex 1           | <a href="http://www.ncbi.nlm.nih.gov/projects/gap/cgi-bin/analysis.cgi?id=pha001380">http://www.ncbi.nlm.nih.gov/projects/gap/cgi-bin/analysis.cgi?id=pha001380</a> |
| CVDMiscTraits | ECGtraits           | RRWOMEN         | Age adjusted RR interval women cohort ex 11 offspring ex 1                 | <a href="http://www.ncbi.nlm.nih.gov/projects/gap/cgi-bin/analysis.cgi?id=pha001382">http://www.ncbi.nlm.nih.gov/projects/gap/cgi-bin/analysis.cgi?id=pha001382</a> |
| CVDMiscTraits | HRVtraits           | HFHRV           | Age & HR adjusted high freq power HRV exams 18 (cohort), 3 (offspring)     | <a href="http://www.ncbi.nlm.nih.gov/projects/gap/cgi-bin/analysis.cgi?id=pha001384">http://www.ncbi.nlm.nih.gov/projects/gap/cgi-bin/analysis.cgi?id=pha001384</a> |
| CVDMiscTraits | HRVtraits           | LFHFHRV         | Age & HR adjusted low:high freq power HRV exams 18 (cohort), 3 (offspring) | <a href="http://www.ncbi.nlm.nih.gov/projects/gap/cgi-bin/analysis.cgi?id=pha001386">http://www.ncbi.nlm.nih.gov/projects/gap/cgi-bin/analysis.cgi?id=pha001386</a> |
| CVDMiscTraits | HRVtraits           | LFHRV           | Age & HR adjusted low frequency power HRV exams 18 (cohort), 3 (offspring) | <a href="http://www.ncbi.nlm.nih.gov/projects/gap/cgi-bin/analysis.cgi?id=pha001388">http://www.ncbi.nlm.nih.gov/projects/gap/cgi-bin/analysis.cgi?id=pha001388</a> |
| CVDMiscTraits | HRVtraits           | PNN50HRV        | Age & HR adjusted PNN50 HRV exams 18 (cohort), 3 (offspring)               | <a href="http://www.ncbi.nlm.nih.gov/projects/gap/cgi-bin/analysis.cgi?id=pha001390">http://www.ncbi.nlm.nih.gov/projects/gap/cgi-bin/analysis.cgi?id=pha001390</a> |
| CVDMiscTraits | HRVtraits           | SDNNHRV         | Age & HR adjusted SDNN HRV exams 18 (cohort), 3 (offspring)                | <a href="http://www.ncbi.nlm.nih.gov/projects/gap/cgi-bin/analysis.cgi?id=pha001392">http://www.ncbi.nlm.nih.gov/projects/gap/cgi-bin/analysis.cgi?id=pha001392</a> |
| CVDMiscTraits | HRVtraits           | TOTPWHRV        | Age & HR adjusted total power HRV exams 18 (cohort), 3 (offspring)         | <a href="http://www.ncbi.nlm.nih.gov/projects/gap/cgi-bin/analysis.cgi?id=pha001394">http://www.ncbi.nlm.nih.gov/projects/gap/cgi-bin/analysis.cgi?id=pha001394</a> |
| CVDMiscTraits | HRVtraits           | VLFHRV          | Age & HR adjusted very low freq power HRV exams 18 (cohort), 3 (offspring) | <a href="http://www.ncbi.nlm.nih.gov/projects/gap/cgi-bin/analysis.cgi?id=pha001396">http://www.ncbi.nlm.nih.gov/projects/gap/cgi-bin/analysis.cgi?id=pha001396</a> |
| CVDMiscTraits | Otherclinicaltraits | ALCOHOL1        | Age- & sex-adjusted drinks/day ex 1                                        | <a href="http://www.ncbi.nlm.nih.gov/projects/gap/cgi-bin/analysis.cgi?id=pha001398">http://www.ncbi.nlm.nih.gov/projects/gap/cgi-bin/analysis.cgi?id=pha001398</a> |
| CVDMiscTraits | Otherclinicaltraits | ALCOHOL2        | Age- & sex-adjusted drinks/day across all exams                            | <a href="http://www.ncbi.nlm.nih.gov/projects/gap/cgi-bin/analysis.cgi?id=pha001400">http://www.ncbi.nlm.nih.gov/projects/gap/cgi-bin/analysis.cgi?id=pha001400</a> |
| CVDMiscTraits | Otherclinicaltraits | ALCOHOL3        | Age- & sex-adjusted max drinks/day at any exam                             | <a href="http://www.ncbi.nlm.nih.gov/projects/gap/cgi-bin/analysis.cgi?id=pha001402">http://www.ncbi.nlm.nih.gov/projects/gap/cgi-bin/analysis.cgi?id=pha001402</a> |
| CVDMiscTraits | Otherclinicaltraits | GALLBLADDER     | Age- & sex-adjusted gallbladder disease                                    | <a href="http://www.ncbi.nlm.nih.gov/projects/gap/cgi-bin/analysis.cgi?id=pha001404">http://www.ncbi.nlm.nih.gov/projects/gap/cgi-bin/analysis.cgi?id=pha001404</a> |
| CVDMiscTraits | Otherclinicaltraits | GOUT            | Age-, sex- & BMI-adjusted gout                                             | <a href="http://www.ncbi.nlm.nih.gov/projects/gap/cgi-bin/analysis.cgi?id=pha001406">http://www.ncbi.nlm.nih.gov/projects/gap/cgi-bin/analysis.cgi?id=pha001406</a> |
| CVDMiscTraits | Othervasctraits     | ALLAF1          | Age- & sex-adjusted incident atrial fibrillation                           | <a href="http://www.ncbi.nlm.nih.gov/projects/gap/cgi-bin/analysis.cgi?id=pha001408">http://www.ncbi.nlm.nih.gov/projects/gap/cgi-bin/analysis.cgi?id=pha001408</a> |
| CVDMiscTraits | Othervasctraits     | ALLAF2          | multivariable-adjusted incident atrial fibrillation                        | <a href="http://www.ncbi.nlm.nih.gov/projects/gap/cgi-bin/analysis.cgi?id=pha001410">http://www.ncbi.nlm.nih.gov/projects/gap/cgi-bin/analysis.cgi?id=pha001410</a> |
| CVDMiscTraits | Othervasctraits     | VARICOSEVEINS   | age- & sex-adjusted varicose veins, men and women                          | <a href="http://www.ncbi.nlm.nih.gov/projects/gap/cgi-bin/analysis.cgi?id=pha001412">http://www.ncbi.nlm.nih.gov/projects/gap/cgi-bin/analysis.cgi?id=pha001412</a> |
| CVDMiscTraits | Othervasctraits     | VARICOSEVEINSF  | age- & #childbirths-adjusted varicose veins in women                       | <a href="http://www.ncbi.nlm.nih.gov/projects/gap/cgi-bin/analysis.cgi?id=pha001414">http://www.ncbi.nlm.nih.gov/projects/gap/cgi-bin/analysis.cgi?id=pha001414</a> |
| CVDMiscTraits | Othervasctraits     | VARICOSEVEINSM  | age-adjusted varicose veins in men                                         | <a href="http://www.ncbi.nlm.nih.gov/projects/gap/cgi-bin/analysis.cgi?id=pha001416">http://www.ncbi.nlm.nih.gov/projects/gap/cgi-bin/analysis.cgi?id=pha001416</a> |
| ITBiomarkers  | Hematological       | Hctavg12as      | Hematocrit, averaged residuals of exam 1 & 2, age & sex                    | <a href="http://www.ncbi.nlm.nih.gov/projects/gap/cgi-bin/analysis.cgi?id=pha000980">http://www.ncbi.nlm.nih.gov/projects/gap/cgi-bin/analysis.cgi?id=pha000980</a> |
| ITBiomarkers  | Hematological       | Hctavg12mv      | Hematocrit, averaged residuals of exam 1 & 2, multivariable                | <a href="http://www.ncbi.nlm.nih.gov/projects/gap/cgi-bin/analysis.cgi?id=pha000982">http://www.ncbi.nlm.nih.gov/projects/gap/cgi-bin/analysis.cgi?id=pha000982</a> |
| ITBiomarkers  | Hematological       | Hctex1as        | Hematocrit exam 1 age & sex                                                | <a href="http://www.ncbi.nlm.nih.gov/projects/gap/cgi-bin/analysis.cgi?id=pha000984">http://www.ncbi.nlm.nih.gov/projects/gap/cgi-bin/analysis.cgi?id=pha000984</a> |
| ITBiomarkers  | Hematological       | Hctex1mv        | Hematocrit exam 1 multivariable                                            | <a href="http://www.ncbi.nlm.nih.gov/projects/gap/cgi-bin/analysis.cgi?id=pha000986">http://www.ncbi.nlm.nih.gov/projects/gap/cgi-bin/analysis.cgi?id=pha000986</a> |
| ITBiomarkers  | Hematological       | Hctex2as        | Hematocrit exam 2 age & sex                                                | <a href="http://www.ncbi.nlm.nih.gov/projects/gap/cgi-bin/analysis.cgi?id=pha000988">http://www.ncbi.nlm.nih.gov/projects/gap/cgi-bin/analysis.cgi?id=pha000988</a> |
| ITBiomarkers  | Hematological       | Hctex2mv        | Hematocrit exam 2 multivariable                                            | <a href="http://www.ncbi.nlm.nih.gov/projects/gap/cgi-bin/analysis.cgi?id=pha000990">http://www.ncbi.nlm.nih.gov/projects/gap/cgi-bin/analysis.cgi?id=pha000990</a> |

Online Table 1: Phenotypes Evaluated for Association using Population-based Analysis (GEE)

| Group        | Category      | Trait Label         | Name                                                                        | GEE Link                                                                                                                                                            |
|--------------|---------------|---------------------|-----------------------------------------------------------------------------|---------------------------------------------------------------------------------------------------------------------------------------------------------------------|
| ITBiomarkers | Hematological | Hgbav12as           | Hemoglobin, averaged residuals of exam 1 & 2, age & sex                     | <a href="http://www.ncbi.nlm.nih.gov/projects/gap/cgi-bin/analysis.cgi?id=pha000992">http://www.ncbi.nlm.nih.gov/projects/gap/cgi-bin/analysis.cgi?id=pha000992</a> |
| ITBiomarkers | Hematological | Hgbav12mv           | Hemoglobin averaged residuals of exam 1 & 2, multivariable                  | <a href="http://www.ncbi.nlm.nih.gov/projects/gap/cgi-bin/analysis.cgi?id=pha000994">http://www.ncbi.nlm.nih.gov/projects/gap/cgi-bin/analysis.cgi?id=pha000994</a> |
| ITBiomarkers | Hematological | Hgbex1as            | Hemoglobin exam 1 age & sex                                                 | <a href="http://www.ncbi.nlm.nih.gov/projects/gap/cgi-bin/analysis.cgi?id=pha000996">http://www.ncbi.nlm.nih.gov/projects/gap/cgi-bin/analysis.cgi?id=pha000996</a> |
| ITBiomarkers | Hematological | Hgbex1mv            | Hemoglobin exam 1 multivariable                                             | <a href="http://www.ncbi.nlm.nih.gov/projects/gap/cgi-bin/analysis.cgi?id=pha000998">http://www.ncbi.nlm.nih.gov/projects/gap/cgi-bin/analysis.cgi?id=pha000998</a> |
| ITBiomarkers | Hematological | Hgbex2as            | Hemoglobin exam 2 age & sex                                                 | <a href="http://www.ncbi.nlm.nih.gov/projects/gap/cgi-bin/analysis.cgi?id=pha001000">http://www.ncbi.nlm.nih.gov/projects/gap/cgi-bin/analysis.cgi?id=pha001000</a> |
| ITBiomarkers | Hematological | Hgbex2mv            | Hemoglobin exam 2 multivariable                                             | <a href="http://www.ncbi.nlm.nih.gov/projects/gap/cgi-bin/analysis.cgi?id=pha001002">http://www.ncbi.nlm.nih.gov/projects/gap/cgi-bin/analysis.cgi?id=pha001002</a> |
| ITBiomarkers | Hematological | MCHCavg12as         | Mean corpuscular hemoglobin concentration avg. residuals exam 1&2 age & sex | <a href="http://www.ncbi.nlm.nih.gov/projects/gap/cgi-bin/analysis.cgi?id=pha001004">http://www.ncbi.nlm.nih.gov/projects/gap/cgi-bin/analysis.cgi?id=pha001004</a> |
| ITBiomarkers | Hematological | MCHCavg12mv         | Mean corpuscular hemoglobin concentration avg. residuals of exam 1&2 MV     | <a href="http://www.ncbi.nlm.nih.gov/projects/gap/cgi-bin/analysis.cgi?id=pha001006">http://www.ncbi.nlm.nih.gov/projects/gap/cgi-bin/analysis.cgi?id=pha001006</a> |
| ITBiomarkers | Hematological | MCHCex1as           | Mean corpuscular hemoglobin concentration exam 1 age & sex                  | <a href="http://www.ncbi.nlm.nih.gov/projects/gap/cgi-bin/analysis.cgi?id=pha001008">http://www.ncbi.nlm.nih.gov/projects/gap/cgi-bin/analysis.cgi?id=pha001008</a> |
| ITBiomarkers | Hematological | MCHCex1mv           | Mean corpuscular hemoglobin concentration exam 1 multivariable              | <a href="http://www.ncbi.nlm.nih.gov/projects/gap/cgi-bin/analysis.cgi?id=pha001010">http://www.ncbi.nlm.nih.gov/projects/gap/cgi-bin/analysis.cgi?id=pha001010</a> |
| ITBiomarkers | Hematological | MCHCex2as           | Mean corpuscular hemoglobin concentration exam 2 age & sex                  | <a href="http://www.ncbi.nlm.nih.gov/projects/gap/cgi-bin/analysis.cgi?id=pha001012">http://www.ncbi.nlm.nih.gov/projects/gap/cgi-bin/analysis.cgi?id=pha001012</a> |
| ITBiomarkers | Hematological | MCHCex2mv           | Mean corpuscular hemoglobin concentration exam 2 multivariable              | <a href="http://www.ncbi.nlm.nih.gov/projects/gap/cgi-bin/analysis.cgi?id=pha001014">http://www.ncbi.nlm.nih.gov/projects/gap/cgi-bin/analysis.cgi?id=pha001014</a> |
| ITBiomarkers | Hematological | MCVavg12as          | Mean corpuscular volume averaged residuals of exam 1 & 2, age & sex         | <a href="http://www.ncbi.nlm.nih.gov/projects/gap/cgi-bin/analysis.cgi?id=pha001016">http://www.ncbi.nlm.nih.gov/projects/gap/cgi-bin/analysis.cgi?id=pha001016</a> |
| ITBiomarkers | Hematological | MCVavg12mv          | Mean corpuscular volume averaged residuals of exam 1 and 2, multivariable   | <a href="http://www.ncbi.nlm.nih.gov/projects/gap/cgi-bin/analysis.cgi?id=pha001018">http://www.ncbi.nlm.nih.gov/projects/gap/cgi-bin/analysis.cgi?id=pha001018</a> |
| ITBiomarkers | Hematological | MCVex1as            | Mean corpuscular volume exam 1 age & sex                                    | <a href="http://www.ncbi.nlm.nih.gov/projects/gap/cgi-bin/analysis.cgi?id=pha001020">http://www.ncbi.nlm.nih.gov/projects/gap/cgi-bin/analysis.cgi?id=pha001020</a> |
| ITBiomarkers | Hematological | MCVex1mv            | Mean corpuscular volume multivariable                                       | <a href="http://www.ncbi.nlm.nih.gov/projects/gap/cgi-bin/analysis.cgi?id=pha001022">http://www.ncbi.nlm.nih.gov/projects/gap/cgi-bin/analysis.cgi?id=pha001022</a> |
| ITBiomarkers | Hematological | MCVex2as            | Mean corpuscular volume exam 2 age & sex                                    | <a href="http://www.ncbi.nlm.nih.gov/projects/gap/cgi-bin/analysis.cgi?id=pha001024">http://www.ncbi.nlm.nih.gov/projects/gap/cgi-bin/analysis.cgi?id=pha001024</a> |
| ITBiomarkers | Hematological | MCVex2mv            | Mean corpuscular volume multivariable exam 2                                | <a href="http://www.ncbi.nlm.nih.gov/projects/gap/cgi-bin/analysis.cgi?id=pha001026">http://www.ncbi.nlm.nih.gov/projects/gap/cgi-bin/analysis.cgi?id=pha001026</a> |
| ITBiomarkers | Hematological | RBCcavg12as         | Red blood cell count averaged residuals of exam 1 & 2, age & sex            | <a href="http://www.ncbi.nlm.nih.gov/projects/gap/cgi-bin/analysis.cgi?id=pha001028">http://www.ncbi.nlm.nih.gov/projects/gap/cgi-bin/analysis.cgi?id=pha001028</a> |
| ITBiomarkers | Hematological | RBCcavg12mv         | Red blood cell count averaged residuals exam 1 & 2, multivariable           | <a href="http://www.ncbi.nlm.nih.gov/projects/gap/cgi-bin/analysis.cgi?id=pha001030">http://www.ncbi.nlm.nih.gov/projects/gap/cgi-bin/analysis.cgi?id=pha001030</a> |
| ITBiomarkers | Hematological | RBCcex1as           | Red blood cell count exam 1 age & sex                                       | <a href="http://www.ncbi.nlm.nih.gov/projects/gap/cgi-bin/analysis.cgi?id=pha001032">http://www.ncbi.nlm.nih.gov/projects/gap/cgi-bin/analysis.cgi?id=pha001032</a> |
| ITBiomarkers | Hematological | RBCcex1mv           | Red blood cell count exam 1 multivariable                                   | <a href="http://www.ncbi.nlm.nih.gov/projects/gap/cgi-bin/analysis.cgi?id=pha001034">http://www.ncbi.nlm.nih.gov/projects/gap/cgi-bin/analysis.cgi?id=pha001034</a> |
| ITBiomarkers | Hematological | RBCcex2as           | Red blood cell count exam 2 age & sex                                       | <a href="http://www.ncbi.nlm.nih.gov/projects/gap/cgi-bin/analysis.cgi?id=pha001036">http://www.ncbi.nlm.nih.gov/projects/gap/cgi-bin/analysis.cgi?id=pha001036</a> |
| ITBiomarkers | Hematological | RBCcex2asWIN        | Red blood cell count exam 2 age & sex, Winsorized                           | <a href="http://www.ncbi.nlm.nih.gov/projects/gap/cgi-bin/analysis.cgi?id=pha001038">http://www.ncbi.nlm.nih.gov/projects/gap/cgi-bin/analysis.cgi?id=pha001038</a> |
| ITBiomarkers | Hematological | RBCcex2mv           | Red blood cell count exam 2 multivariable                                   | <a href="http://www.ncbi.nlm.nih.gov/projects/gap/cgi-bin/analysis.cgi?id=pha001040">http://www.ncbi.nlm.nih.gov/projects/gap/cgi-bin/analysis.cgi?id=pha001040</a> |
| ITBiomarkers | Hematological | RBCcex2mvWIN        | Red blood cell count exam 2 multivariable, Winsorized                       | <a href="http://www.ncbi.nlm.nih.gov/projects/gap/cgi-bin/analysis.cgi?id=pha001042">http://www.ncbi.nlm.nih.gov/projects/gap/cgi-bin/analysis.cgi?id=pha001042</a> |
| ITBiomarkers | Hematological | WBCavg12as          | White blood cell count averaged residuals of exam 1 & 2, age & sex          | <a href="http://www.ncbi.nlm.nih.gov/projects/gap/cgi-bin/analysis.cgi?id=pha001044">http://www.ncbi.nlm.nih.gov/projects/gap/cgi-bin/analysis.cgi?id=pha001044</a> |
| ITBiomarkers | Hematological | WBCavg12mv          | White blood cell count, averaged residuals of exam 1 & 2, multivariable     | <a href="http://www.ncbi.nlm.nih.gov/projects/gap/cgi-bin/analysis.cgi?id=pha001046">http://www.ncbi.nlm.nih.gov/projects/gap/cgi-bin/analysis.cgi?id=pha001046</a> |
| ITBiomarkers | Hematological | WBCex1as            | White blood cell count exam 1 age & sex, log transformed                    | <a href="http://www.ncbi.nlm.nih.gov/projects/gap/cgi-bin/analysis.cgi?id=pha001048">http://www.ncbi.nlm.nih.gov/projects/gap/cgi-bin/analysis.cgi?id=pha001048</a> |
| ITBiomarkers | Hematological | WBCex1mv            | White blood cell count exam 1 multivariable, log transformed                | <a href="http://www.ncbi.nlm.nih.gov/projects/gap/cgi-bin/analysis.cgi?id=pha001050">http://www.ncbi.nlm.nih.gov/projects/gap/cgi-bin/analysis.cgi?id=pha001050</a> |
| ITBiomarkers | Hematological | WBCex2as            | White blood cell count exam 2 age & sex                                     | <a href="http://www.ncbi.nlm.nih.gov/projects/gap/cgi-bin/analysis.cgi?id=pha001052">http://www.ncbi.nlm.nih.gov/projects/gap/cgi-bin/analysis.cgi?id=pha001052</a> |
| ITBiomarkers | Hematological | WBCex2mv            | White blood cell count exam 2 multivariable                                 | <a href="http://www.ncbi.nlm.nih.gov/projects/gap/cgi-bin/analysis.cgi?id=pha001054">http://www.ncbi.nlm.nih.gov/projects/gap/cgi-bin/analysis.cgi?id=pha001054</a> |
| ITBiomarkers | Hemostatic    | dDimerex5as         | D dimer at exam 6 age & sex, log transformed                                | <a href="http://www.ncbi.nlm.nih.gov/projects/gap/cgi-bin/analysis.cgi?id=pha001056">http://www.ncbi.nlm.nih.gov/projects/gap/cgi-bin/analysis.cgi?id=pha001056</a> |
| ITBiomarkers | Hemostatic    | dDimerex5mv         | D dimer at exam 6 multivariable, log transformed                            | <a href="http://www.ncbi.nlm.nih.gov/projects/gap/cgi-bin/analysis.cgi?id=pha001058">http://www.ncbi.nlm.nih.gov/projects/gap/cgi-bin/analysis.cgi?id=pha001058</a> |
| ITBiomarkers | Hemostatic    | FibrinogenAvg567as  | Fibrinogen averaged residuals of exam 5, 6 & 7 age & sex, log transformed   | <a href="http://www.ncbi.nlm.nih.gov/projects/gap/cgi-bin/analysis.cgi?id=pha001060">http://www.ncbi.nlm.nih.gov/projects/gap/cgi-bin/analysis.cgi?id=pha001060</a> |
| ITBiomarkers | Hemostatic    | FibrinogenAvg567mv  | Fibrinogen averaged residuals exam 5, 6 & 7 multivariable, log transformed  | <a href="http://www.ncbi.nlm.nih.gov/projects/gap/cgi-bin/analysis.cgi?id=pha001062">http://www.ncbi.nlm.nih.gov/projects/gap/cgi-bin/analysis.cgi?id=pha001062</a> |
| ITBiomarkers | Hemostatic    | Fibrinogenex5as     | Fibrinogen at exam 5 age & sex, log transformed                             | <a href="http://www.ncbi.nlm.nih.gov/projects/gap/cgi-bin/analysis.cgi?id=pha001064">http://www.ncbi.nlm.nih.gov/projects/gap/cgi-bin/analysis.cgi?id=pha001064</a> |
| ITBiomarkers | Hemostatic    | Fibrinogenex5mv     | Fibrinogen at exam 5 multivariable, log transformed                         | <a href="http://www.ncbi.nlm.nih.gov/projects/gap/cgi-bin/analysis.cgi?id=pha001066">http://www.ncbi.nlm.nih.gov/projects/gap/cgi-bin/analysis.cgi?id=pha001066</a> |
| ITBiomarkers | Hemostatic    | Fibrinogenex6as     | Fibrinogen at exam 6 age & sex, log transformed                             | <a href="http://www.ncbi.nlm.nih.gov/projects/gap/cgi-bin/analysis.cgi?id=pha001068">http://www.ncbi.nlm.nih.gov/projects/gap/cgi-bin/analysis.cgi?id=pha001068</a> |
| ITBiomarkers | Hemostatic    | Fibrinogenex6mv     | Fibrinogen at exam 6 multivariable, log transformed                         | <a href="http://www.ncbi.nlm.nih.gov/projects/gap/cgi-bin/analysis.cgi?id=pha001070">http://www.ncbi.nlm.nih.gov/projects/gap/cgi-bin/analysis.cgi?id=pha001070</a> |
| ITBiomarkers | Hemostatic    | Fibrinogenex7as     | Fibrinogen at exam 7 age & sex, log transformed                             | <a href="http://www.ncbi.nlm.nih.gov/projects/gap/cgi-bin/analysis.cgi?id=pha001072">http://www.ncbi.nlm.nih.gov/projects/gap/cgi-bin/analysis.cgi?id=pha001072</a> |
| ITBiomarkers | Hemostatic    | Fibrinogenex7mv     | Fibrinogen at exam 7 multivariable, log transformed                         | <a href="http://www.ncbi.nlm.nih.gov/projects/gap/cgi-bin/analysis.cgi?id=pha001074">http://www.ncbi.nlm.nih.gov/projects/gap/cgi-bin/analysis.cgi?id=pha001074</a> |
| ITBiomarkers | Hemostatic    | FVIIlex5as          | Factor VII at exam 5 age & sex                                              | <a href="http://www.ncbi.nlm.nih.gov/projects/gap/cgi-bin/analysis.cgi?id=pha001076">http://www.ncbi.nlm.nih.gov/projects/gap/cgi-bin/analysis.cgi?id=pha001076</a> |
| ITBiomarkers | Hemostatic    | FVIIlex5mv          | Factor VII at exam 5 multivariable                                          | <a href="http://www.ncbi.nlm.nih.gov/projects/gap/cgi-bin/analysis.cgi?id=pha001078">http://www.ncbi.nlm.nih.gov/projects/gap/cgi-bin/analysis.cgi?id=pha001078</a> |
| ITBiomarkers | Hemostatic    | PAI1ex56Avgas       | Log plasminogen Activator 1 avg. residuals exam 5& 6 age & sex              | <a href="http://www.ncbi.nlm.nih.gov/projects/gap/cgi-bin/analysis.cgi?id=pha001080">http://www.ncbi.nlm.nih.gov/projects/gap/cgi-bin/analysis.cgi?id=pha001080</a> |
| ITBiomarkers | Hemostatic    | PAI1ex56Avgmv       | Log plasminogen Activator 1 avg. residuals exam 5 & 6 multivariable         | <a href="http://www.ncbi.nlm.nih.gov/projects/gap/cgi-bin/analysis.cgi?id=pha001082">http://www.ncbi.nlm.nih.gov/projects/gap/cgi-bin/analysis.cgi?id=pha001082</a> |
| ITBiomarkers | Hemostatic    | PAI1ex5as           | Plasminogen Activator 1 at exam 5 age & sex, log transformed                | <a href="http://www.ncbi.nlm.nih.gov/projects/gap/cgi-bin/analysis.cgi?id=pha001084">http://www.ncbi.nlm.nih.gov/projects/gap/cgi-bin/analysis.cgi?id=pha001084</a> |
| ITBiomarkers | Hemostatic    | PAI1ex5mv           | Plasminogen Activator 1 at exam 5 multivariable, log transformed            | <a href="http://www.ncbi.nlm.nih.gov/projects/gap/cgi-bin/analysis.cgi?id=pha001086">http://www.ncbi.nlm.nih.gov/projects/gap/cgi-bin/analysis.cgi?id=pha001086</a> |
| ITBiomarkers | Hemostatic    | PAI1ex6as           | Plasminogen Activator 1 at exam 6 age & sex, log transformed                | <a href="http://www.ncbi.nlm.nih.gov/projects/gap/cgi-bin/analysis.cgi?id=pha001088">http://www.ncbi.nlm.nih.gov/projects/gap/cgi-bin/analysis.cgi?id=pha001088</a> |
| ITBiomarkers | Hemostatic    | PAI1ex6mv           | Plasminogen Activator 1 at exam 6 multivariable, log transformed            | <a href="http://www.ncbi.nlm.nih.gov/projects/gap/cgi-bin/analysis.cgi?id=pha001090">http://www.ncbi.nlm.nih.gov/projects/gap/cgi-bin/analysis.cgi?id=pha001090</a> |
| ITBiomarkers | Hemostatic    | PlateletAgADPex5as  | Platelet Aggregation to ADP exam 5, age & sex, log transformed              | <a href="http://www.ncbi.nlm.nih.gov/projects/gap/cgi-bin/analysis.cgi?id=pha001092">http://www.ncbi.nlm.nih.gov/projects/gap/cgi-bin/analysis.cgi?id=pha001092</a> |
| ITBiomarkers | Hemostatic    | PlateletAgADPex5mv  | Log ADP platelet aggregation, exam 5, multivariable                         | <a href="http://www.ncbi.nlm.nih.gov/projects/gap/cgi-bin/analysis.cgi?id=pha001094">http://www.ncbi.nlm.nih.gov/projects/gap/cgi-bin/analysis.cgi?id=pha001094</a> |
| ITBiomarkers | Hemostatic    | PlateletAgCollex5as | Platelet Aggregation to collagen, exam 5, age & sex, log transformed        | <a href="http://www.ncbi.nlm.nih.gov/projects/gap/cgi-bin/analysis.cgi?id=pha001096">http://www.ncbi.nlm.nih.gov/projects/gap/cgi-bin/analysis.cgi?id=pha001096</a> |
| ITBiomarkers | Hemostatic    | PlateletAgCollex5mv | Platelet Aggregation to collagen, exam 5, multivariable, log transformed    | <a href="http://www.ncbi.nlm.nih.gov/projects/gap/cgi-bin/analysis.cgi?id=pha001098">http://www.ncbi.nlm.nih.gov/projects/gap/cgi-bin/analysis.cgi?id=pha001098</a> |
| ITBiomarkers | Hemostatic    | PlateletAgEpiex5as  | Platelet Aggregation to Epinephrine at exam 5 age & sex, log transformed    | <a href="http://www.ncbi.nlm.nih.gov/projects/gap/cgi-bin/analysis.cgi?id=pha001100">http://www.ncbi.nlm.nih.gov/projects/gap/cgi-bin/analysis.cgi?id=pha001100</a> |

Online Table 1: Phenotypes Evaluated for Association using Population-based Analysis (GEE)

| Group        | Category     | Trait Label        | Name                                                                      | GEE Link                                                                                                                                                            |
|--------------|--------------|--------------------|---------------------------------------------------------------------------|---------------------------------------------------------------------------------------------------------------------------------------------------------------------|
| ITBiomarkers | Hemostatic   | PlateletAgEpiex5mv | Platelet Aggregation to Epinephrine exam 5 multivariable, log transformed | <a href="http://www.ncbi.nlm.nih.gov/projects/gap/cgi-bin/analysis.cgi?id=pha001102">http://www.ncbi.nlm.nih.gov/projects/gap/cgi-bin/analysis.cgi?id=pha001102</a> |
| ITBiomarkers | Hemostatic   | tPAex5as           | tPA Antigen at exam 5 age & sex, log transformed                          | <a href="http://www.ncbi.nlm.nih.gov/projects/gap/cgi-bin/analysis.cgi?id=pha001104">http://www.ncbi.nlm.nih.gov/projects/gap/cgi-bin/analysis.cgi?id=pha001104</a> |
| ITBiomarkers | Hemostatic   | tPAex5mv           | tPA Antigen at exam 5 multivariable, log transformed                      | <a href="http://www.ncbi.nlm.nih.gov/projects/gap/cgi-bin/analysis.cgi?id=pha001106">http://www.ncbi.nlm.nih.gov/projects/gap/cgi-bin/analysis.cgi?id=pha001106</a> |
| ITBiomarkers | Hemostatic   | Viscosityex5as     | Viscosity I at exam 5 age & sex                                           | <a href="http://www.ncbi.nlm.nih.gov/projects/gap/cgi-bin/analysis.cgi?id=pha001108">http://www.ncbi.nlm.nih.gov/projects/gap/cgi-bin/analysis.cgi?id=pha001108</a> |
| ITBiomarkers | Hemostatic   | Viscosityex5mv     | Viscosity I at exam 5 multivariable                                       | <a href="http://www.ncbi.nlm.nih.gov/projects/gap/cgi-bin/analysis.cgi?id=pha001110">http://www.ncbi.nlm.nih.gov/projects/gap/cgi-bin/analysis.cgi?id=pha001110</a> |
| ITBiomarkers | Hemostatic   | wVWex5as           | von Willebrand Factor at exam 5 age & sex                                 | <a href="http://www.ncbi.nlm.nih.gov/projects/gap/cgi-bin/analysis.cgi?id=pha001112">http://www.ncbi.nlm.nih.gov/projects/gap/cgi-bin/analysis.cgi?id=pha001112</a> |
| ITBiomarkers | Hemostatic   | wVWex5mv           | von Willebrand Factor at exam 5 multivariable                             | <a href="http://www.ncbi.nlm.nih.gov/projects/gap/cgi-bin/analysis.cgi?id=pha001114">http://www.ncbi.nlm.nih.gov/projects/gap/cgi-bin/analysis.cgi?id=pha001114</a> |
| ITBiomarkers | Inflammation | CD40Lplasmaex7as   | CD40Ligand plasma exam 7, age- & sex-adjusted, log transformed            | <a href="http://www.ncbi.nlm.nih.gov/projects/gap/cgi-bin/analysis.cgi?id=pha001116">http://www.ncbi.nlm.nih.gov/projects/gap/cgi-bin/analysis.cgi?id=pha001116</a> |
| ITBiomarkers | Inflammation | CD40Lplasmaex7mv   | CD40Ligand plasma exam 7 multivariable-adjusted, log transformed          | <a href="http://www.ncbi.nlm.nih.gov/projects/gap/cgi-bin/analysis.cgi?id=pha001118">http://www.ncbi.nlm.nih.gov/projects/gap/cgi-bin/analysis.cgi?id=pha001118</a> |
| ITBiomarkers | Inflammation | CD40Lserumex7as    | CD40Ligand serum exam 7, age- & sex-adjusted, log transformed             | <a href="http://www.ncbi.nlm.nih.gov/projects/gap/cgi-bin/analysis.cgi?id=pha001120">http://www.ncbi.nlm.nih.gov/projects/gap/cgi-bin/analysis.cgi?id=pha001120</a> |
| ITBiomarkers | Inflammation | CD40Lserumex7mv    | CD40Ligand serum, exam 7 multivariable-adjusted, log transformed          | <a href="http://www.ncbi.nlm.nih.gov/projects/gap/cgi-bin/analysis.cgi?id=pha001122">http://www.ncbi.nlm.nih.gov/projects/gap/cgi-bin/analysis.cgi?id=pha001122</a> |
| ITBiomarkers | Inflammation | CRPavg267asB       | Log C-reactive protein average exam 2, 6 & 7 age- & sex-adjusted          | <a href="http://www.ncbi.nlm.nih.gov/projects/gap/cgi-bin/analysis.cgi?id=pha001172">http://www.ncbi.nlm.nih.gov/projects/gap/cgi-bin/analysis.cgi?id=pha001172</a> |
| ITBiomarkers | Inflammation | CRPavg267mvB       | Log C-reactive protein average exam 2, 6 & 7, multivariable-adjusted      | <a href="http://www.ncbi.nlm.nih.gov/projects/gap/cgi-bin/analysis.cgi?id=pha001174">http://www.ncbi.nlm.nih.gov/projects/gap/cgi-bin/analysis.cgi?id=pha001174</a> |
| ITBiomarkers | Inflammation | CRPex2asB          | Log C-reactive protein exam 2, age- & sex-adjusted                        | <a href="http://www.ncbi.nlm.nih.gov/projects/gap/cgi-bin/analysis.cgi?id=pha001176">http://www.ncbi.nlm.nih.gov/projects/gap/cgi-bin/analysis.cgi?id=pha001176</a> |
| ITBiomarkers | Inflammation | CRPex2mvB          | Log C-reactive protein exam 2, multivariable-adjusted                     | <a href="http://www.ncbi.nlm.nih.gov/projects/gap/cgi-bin/analysis.cgi?id=pha001178">http://www.ncbi.nlm.nih.gov/projects/gap/cgi-bin/analysis.cgi?id=pha001178</a> |
| ITBiomarkers | Inflammation | CRPex5as           | Log C-reactive protein Hemagen Assay exam 5, age- & sex-adjusted          | <a href="http://www.ncbi.nlm.nih.gov/projects/gap/cgi-bin/analysis.cgi?id=pha001124">http://www.ncbi.nlm.nih.gov/projects/gap/cgi-bin/analysis.cgi?id=pha001124</a> |
| ITBiomarkers | Inflammation | CRPex5mv           | Log C-reactive protein Hemagen Assay exam 5, multivariable-adjusted       | <a href="http://www.ncbi.nlm.nih.gov/projects/gap/cgi-bin/analysis.cgi?id=pha001126">http://www.ncbi.nlm.nih.gov/projects/gap/cgi-bin/analysis.cgi?id=pha001126</a> |
| ITBiomarkers | Inflammation | CRPex6as           | Log C-reactive protein exam 6, age- & sex-adjusted                        | <a href="http://www.ncbi.nlm.nih.gov/projects/gap/cgi-bin/analysis.cgi?id=pha001128">http://www.ncbi.nlm.nih.gov/projects/gap/cgi-bin/analysis.cgi?id=pha001128</a> |
| ITBiomarkers | Inflammation | CRPex6mv           | Log C-reactive protein exam 6, multivariable-adjusted                     | <a href="http://www.ncbi.nlm.nih.gov/projects/gap/cgi-bin/analysis.cgi?id=pha001130">http://www.ncbi.nlm.nih.gov/projects/gap/cgi-bin/analysis.cgi?id=pha001130</a> |
| ITBiomarkers | Inflammation | CRPex7as           | Log C-reactive protein exam 7, age- & sex-adjusted                        | <a href="http://www.ncbi.nlm.nih.gov/projects/gap/cgi-bin/analysis.cgi?id=pha001132">http://www.ncbi.nlm.nih.gov/projects/gap/cgi-bin/analysis.cgi?id=pha001132</a> |
| ITBiomarkers | Inflammation | CRPex7mv           | Log C-reactive protein exam 7, multivariable-adjusted                     | <a href="http://www.ncbi.nlm.nih.gov/projects/gap/cgi-bin/analysis.cgi?id=pha001134">http://www.ncbi.nlm.nih.gov/projects/gap/cgi-bin/analysis.cgi?id=pha001134</a> |
| ITBiomarkers | Inflammation | ICAM1ex7as         | Log intercellular adhesion molecule-1 exam 7, age- & sex-adjusted         | <a href="http://www.ncbi.nlm.nih.gov/projects/gap/cgi-bin/analysis.cgi?id=pha001136">http://www.ncbi.nlm.nih.gov/projects/gap/cgi-bin/analysis.cgi?id=pha001136</a> |
| ITBiomarkers | Inflammation | ICAM1ex7mv         | Log intercellular adhesion molecule-1 exam 7, multivariable-adjusted      | <a href="http://www.ncbi.nlm.nih.gov/projects/gap/cgi-bin/analysis.cgi?id=pha001138">http://www.ncbi.nlm.nih.gov/projects/gap/cgi-bin/analysis.cgi?id=pha001138</a> |
| ITBiomarkers | Inflammation | IL6ex7as           | Log interleukin 6 Exam 7, age- & sex-adjusted                             | <a href="http://www.ncbi.nlm.nih.gov/projects/gap/cgi-bin/analysis.cgi?id=pha001140">http://www.ncbi.nlm.nih.gov/projects/gap/cgi-bin/analysis.cgi?id=pha001140</a> |
| ITBiomarkers | Inflammation | IL6ex7mv           | Log interleukin 6 Exam 7, multivariable-adjusted                          | <a href="http://www.ncbi.nlm.nih.gov/projects/gap/cgi-bin/analysis.cgi?id=pha001142">http://www.ncbi.nlm.nih.gov/projects/gap/cgi-bin/analysis.cgi?id=pha001142</a> |
| ITBiomarkers | Inflammation | IsoCrUrinePex7as   | Log urinary isoprostanes/creatinine exam 7, age- & sex-adjusted           | <a href="http://www.ncbi.nlm.nih.gov/projects/gap/cgi-bin/analysis.cgi?id=pha001144">http://www.ncbi.nlm.nih.gov/projects/gap/cgi-bin/analysis.cgi?id=pha001144</a> |
| ITBiomarkers | Inflammation | IsoCrUrinePex7mv   | Log urinary isoprostanes/creatinine exam 7, multivariable-adjusted        | <a href="http://www.ncbi.nlm.nih.gov/projects/gap/cgi-bin/analysis.cgi?id=pha001146">http://www.ncbi.nlm.nih.gov/projects/gap/cgi-bin/analysis.cgi?id=pha001146</a> |
| ITBiomarkers | Inflammation | MCP1ex7as          | Log monocyte chemoattractant protein 1 exam 7, age- & sex-adjusted        | <a href="http://www.ncbi.nlm.nih.gov/projects/gap/cgi-bin/analysis.cgi?id=pha001148">http://www.ncbi.nlm.nih.gov/projects/gap/cgi-bin/analysis.cgi?id=pha001148</a> |
| ITBiomarkers | Inflammation | MCP1ex7mv          | Log monocyte chemoattractant protein 1 exam 7, multivariable-adjusted     | <a href="http://www.ncbi.nlm.nih.gov/projects/gap/cgi-bin/analysis.cgi?id=pha001150">http://www.ncbi.nlm.nih.gov/projects/gap/cgi-bin/analysis.cgi?id=pha001150</a> |
| ITBiomarkers | Inflammation | MPOex7as           | Log myeloperoxidase exam 7, age- & sex-adjusted                           | <a href="http://www.ncbi.nlm.nih.gov/projects/gap/cgi-bin/analysis.cgi?id=pha001152">http://www.ncbi.nlm.nih.gov/projects/gap/cgi-bin/analysis.cgi?id=pha001152</a> |
| ITBiomarkers | Inflammation | MPOex7mv           | Log myeloperoxidase exam 7, multivariable-adjusted                        | <a href="http://www.ncbi.nlm.nih.gov/projects/gap/cgi-bin/analysis.cgi?id=pha001154">http://www.ncbi.nlm.nih.gov/projects/gap/cgi-bin/analysis.cgi?id=pha001154</a> |
| ITBiomarkers | Inflammation | OPGex7as           | Log osteoprotegerin exam 7, age- & sex-adjusted                           | <a href="http://www.ncbi.nlm.nih.gov/projects/gap/cgi-bin/analysis.cgi?id=pha001156">http://www.ncbi.nlm.nih.gov/projects/gap/cgi-bin/analysis.cgi?id=pha001156</a> |
| ITBiomarkers | Inflammation | OPGex7mv           | Log osteoprotegerin exam 7, multivariable-adjusted                        | <a href="http://www.ncbi.nlm.nih.gov/projects/gap/cgi-bin/analysis.cgi?id=pha001158">http://www.ncbi.nlm.nih.gov/projects/gap/cgi-bin/analysis.cgi?id=pha001158</a> |
| ITBiomarkers | Inflammation | Pselectinex7as     | Log P-selectin exam 7, age- & sex-adjusted                                | <a href="http://www.ncbi.nlm.nih.gov/projects/gap/cgi-bin/analysis.cgi?id=pha001160">http://www.ncbi.nlm.nih.gov/projects/gap/cgi-bin/analysis.cgi?id=pha001160</a> |
| ITBiomarkers | Inflammation | Pselectinex7mv     | Log P-selectin exam 7, multivariable-adjusted                             | <a href="http://www.ncbi.nlm.nih.gov/projects/gap/cgi-bin/analysis.cgi?id=pha001162">http://www.ncbi.nlm.nih.gov/projects/gap/cgi-bin/analysis.cgi?id=pha001162</a> |
| ITBiomarkers | Inflammation | TNFAex7as          | Log tumor necrosis factor alpha exam 7, age- & sex-adjusted               | <a href="http://www.ncbi.nlm.nih.gov/projects/gap/cgi-bin/analysis.cgi?id=pha001164">http://www.ncbi.nlm.nih.gov/projects/gap/cgi-bin/analysis.cgi?id=pha001164</a> |
| ITBiomarkers | Inflammation | TNFAex7mv          | Log tumor necrosis factor alpha exam 7, multivariable-adjusted            | <a href="http://www.ncbi.nlm.nih.gov/projects/gap/cgi-bin/analysis.cgi?id=pha001166">http://www.ncbi.nlm.nih.gov/projects/gap/cgi-bin/analysis.cgi?id=pha001166</a> |
| ITBiomarkers | Inflammation | TNFR1lex7as        | Log tumor necrosis factor receptor I exam 7, age- & sex-adjusted          | <a href="http://www.ncbi.nlm.nih.gov/projects/gap/cgi-bin/analysis.cgi?id=pha001168">http://www.ncbi.nlm.nih.gov/projects/gap/cgi-bin/analysis.cgi?id=pha001168</a> |
| ITBiomarkers | Inflammation | TNFR1lex7mv        | Log tumor necrosis factor receptor I exam 7 multivariable-adjusted        | <a href="http://www.ncbi.nlm.nih.gov/projects/gap/cgi-bin/analysis.cgi?id=pha001170">http://www.ncbi.nlm.nih.gov/projects/gap/cgi-bin/analysis.cgi?id=pha001170</a> |
| ITBiomarkers | LFT          | AlkPhosex2as       | Log alkaline phosphatase exam 2 age- & sex-adjusted                       | <a href="http://www.ncbi.nlm.nih.gov/projects/gap/cgi-bin/analysis.cgi?id=pha001180">http://www.ncbi.nlm.nih.gov/projects/gap/cgi-bin/analysis.cgi?id=pha001180</a> |
| ITBiomarkers | LFT          | AlkPhosex2mv       | Log alkaline phosphatase exam 2, multivariable-adjusted                   | <a href="http://www.ncbi.nlm.nih.gov/projects/gap/cgi-bin/analysis.cgi?id=pha001182">http://www.ncbi.nlm.nih.gov/projects/gap/cgi-bin/analysis.cgi?id=pha001182</a> |
| ITBiomarkers | LFT          | ALTex2as           | Log alanine transaminase exam 2, age- & sex-adjusted                      | <a href="http://www.ncbi.nlm.nih.gov/projects/gap/cgi-bin/analysis.cgi?id=pha001184">http://www.ncbi.nlm.nih.gov/projects/gap/cgi-bin/analysis.cgi?id=pha001184</a> |
| ITBiomarkers | LFT          | ALTex2mv           | Log alanine transaminase exam 2; multivariable-adjusted                   | <a href="http://www.ncbi.nlm.nih.gov/projects/gap/cgi-bin/analysis.cgi?id=pha001186">http://www.ncbi.nlm.nih.gov/projects/gap/cgi-bin/analysis.cgi?id=pha001186</a> |
| ITBiomarkers | LFT          | ASTex2as           | Log aspartate aminotransferase exam, age- & sex-adjusted                  | <a href="http://www.ncbi.nlm.nih.gov/projects/gap/cgi-bin/analysis.cgi?id=pha001188">http://www.ncbi.nlm.nih.gov/projects/gap/cgi-bin/analysis.cgi?id=pha001188</a> |
| ITBiomarkers | LFT          | ASTex2mv           | Log aspartate aminotransferase exam 2 multivariable-adjusted              | <a href="http://www.ncbi.nlm.nih.gov/projects/gap/cgi-bin/analysis.cgi?id=pha001190">http://www.ncbi.nlm.nih.gov/projects/gap/cgi-bin/analysis.cgi?id=pha001190</a> |
| ITBiomarkers | LFT          | Bilirubinex2as     | Log bilirubin exam 2, age- & sex-adjusted                                 | <a href="http://www.ncbi.nlm.nih.gov/projects/gap/cgi-bin/analysis.cgi?id=pha001192">http://www.ncbi.nlm.nih.gov/projects/gap/cgi-bin/analysis.cgi?id=pha001192</a> |
| ITBiomarkers | LFT          | Bilirubinex2mv     | Log bilirubin exam 2 multivariable                                        | <a href="http://www.ncbi.nlm.nih.gov/projects/gap/cgi-bin/analysis.cgi?id=pha001194">http://www.ncbi.nlm.nih.gov/projects/gap/cgi-bin/analysis.cgi?id=pha001194</a> |
| ITBiomarkers | LFT          | GGTEx2as           | Log gamma-glutamyl transferase exam 2, age- & sex-adjusted                | <a href="http://www.ncbi.nlm.nih.gov/projects/gap/cgi-bin/analysis.cgi?id=pha001196">http://www.ncbi.nlm.nih.gov/projects/gap/cgi-bin/analysis.cgi?id=pha001196</a> |
| ITBiomarkers | LFT          | GGTEx2mv           | Log Gamma-glutamyl transferase exam 2, Multivariable,adjusted             | <a href="http://www.ncbi.nlm.nih.gov/projects/gap/cgi-bin/analysis.cgi?id=pha001198">http://www.ncbi.nlm.nih.gov/projects/gap/cgi-bin/analysis.cgi?id=pha001198</a> |
| ITBiomarkers | Neurohumoral | ANPex6as           | Log atrial natriuretic peptide exam 6, age- & sex-adjusted Tobit-model    | <a href="http://www.ncbi.nlm.nih.gov/projects/gap/cgi-bin/analysis.cgi?id=pha001200">http://www.ncbi.nlm.nih.gov/projects/gap/cgi-bin/analysis.cgi?id=pha001200</a> |
| ITBiomarkers | Neurohumoral | ANPex6mv           | Log atrial natriuretic peptide exam 6, multivariable-adjusted Tobit model | <a href="http://www.ncbi.nlm.nih.gov/projects/gap/cgi-bin/analysis.cgi?id=pha001202">http://www.ncbi.nlm.nih.gov/projects/gap/cgi-bin/analysis.cgi?id=pha001202</a> |
| ITBiomarkers | Neurohumoral | BNPex6as           | Log brain natriuretic peptide exam 6, age- & sex-adjusted Tobit model     | <a href="http://www.ncbi.nlm.nih.gov/projects/gap/cgi-bin/analysis.cgi?id=pha001204">http://www.ncbi.nlm.nih.gov/projects/gap/cgi-bin/analysis.cgi?id=pha001204</a> |
| ITBiomarkers | Neurohumoral | BNPex6mv           | Log brain natriuretic peptide exam 6, multivariable-adjusted Tobit model  | <a href="http://www.ncbi.nlm.nih.gov/projects/gap/cgi-bin/analysis.cgi?id=pha001206">http://www.ncbi.nlm.nih.gov/projects/gap/cgi-bin/analysis.cgi?id=pha001206</a> |
| ITBiomarkers | Vitamins     | VitD25OHex6or7as   | 25(OH)-D exam 6 or 7, age & sex adjusted                                  | <a href="http://www.ncbi.nlm.nih.gov/projects/gap/cgi-bin/analysis.cgi?id=pha001208">http://www.ncbi.nlm.nih.gov/projects/gap/cgi-bin/analysis.cgi?id=pha001208</a> |
| ITBiomarkers | Vitamins     | VitD25OHex6or7mv   | 25(OH)-D exam 6 or 7, multivariable-adjusted; covariates from vit D exam  | <a href="http://www.ncbi.nlm.nih.gov/projects/gap/cgi-bin/analysis.cgi?id=pha001210">http://www.ncbi.nlm.nih.gov/projects/gap/cgi-bin/analysis.cgi?id=pha001210</a> |



Online Table 1: Phenotypes Evaluated for Association using Population-based Analysis (GEE)

| Group        | Category  | Trait Label         | Name                                                                    | GEE Link                                                                                                                                                            |
|--------------|-----------|---------------------|-------------------------------------------------------------------------|---------------------------------------------------------------------------------------------------------------------------------------------------------------------|
| ITBiomarkers | Vitamins  | VitKPhylloqex6or7as | Vit K exam 6 or 7, age & sex adjusted, log transformed, no warfarin     | <a href="http://www.ncbi.nlm.nih.gov/projects/gap/cgi-bin/analysis.cgi?id=pha001212">http://www.ncbi.nlm.nih.gov/projects/gap/cgi-bin/analysis.cgi?id=pha001212</a> |
| ITBiomarkers | Vitamins  | VitKPhylloqex6or7mv | Vit K exam 6 or 7, multivariable-adjusted, log transformed, no warfarin | <a href="http://www.ncbi.nlm.nih.gov/projects/gap/cgi-bin/analysis.cgi?id=pha001214">http://www.ncbi.nlm.nih.gov/projects/gap/cgi-bin/analysis.cgi?id=pha001214</a> |
| ITBiomarkers | Vitamins  | VitKPucOCex6or7as   | %ucOC, exam 6 or 7, age, sex adjust, log transformed; no warfarin       | <a href="http://www.ncbi.nlm.nih.gov/projects/gap/cgi-bin/analysis.cgi?id=pha001216">http://www.ncbi.nlm.nih.gov/projects/gap/cgi-bin/analysis.cgi?id=pha001216</a> |
| ITBiomarkers | Vitamins  | VitKPucOCex6or7mv   | %ucOC, exam 6 or 7, multivariable, log-transformed, no warfarin use     | <a href="http://www.ncbi.nlm.nih.gov/projects/gap/cgi-bin/analysis.cgi?id=pha001218">http://www.ncbi.nlm.nih.gov/projects/gap/cgi-bin/analysis.cgi?id=pha001218</a> |
| Metabolic    | Adiposity | allbmi1602          | adj bmi, offsp 2 & cohort 16 exams                                      | <a href="http://www.ncbi.nlm.nih.gov/projects/gap/cgi-bin/analysis.cgi?id=pha000102">http://www.ncbi.nlm.nih.gov/projects/gap/cgi-bin/analysis.cgi?id=pha000102</a> |
| Metabolic    | Adiposity | allbmi1803          | adj bmi, offsp 3 & cohort 18 exams                                      | <a href="http://www.ncbi.nlm.nih.gov/projects/gap/cgi-bin/analysis.cgi?id=pha000104">http://www.ncbi.nlm.nih.gov/projects/gap/cgi-bin/analysis.cgi?id=pha000104</a> |
| Metabolic    | Adiposity | allbmi1x01          | adj bmi, offsp 1 & cohort 10 exams                                      | <a href="http://www.ncbi.nlm.nih.gov/projects/gap/cgi-bin/analysis.cgi?id=pha000106">http://www.ncbi.nlm.nih.gov/projects/gap/cgi-bin/analysis.cgi?id=pha000106</a> |
| Metabolic    | Adiposity | allbmi2004          | adj bmi, offsp 4 & cohort 20 exams                                      | <a href="http://www.ncbi.nlm.nih.gov/projects/gap/cgi-bin/analysis.cgi?id=pha000108">http://www.ncbi.nlm.nih.gov/projects/gap/cgi-bin/analysis.cgi?id=pha000108</a> |
| Metabolic    | Adiposity | allbmi2205          | adj bmi, offsp 5 & cohort 22 exams                                      | <a href="http://www.ncbi.nlm.nih.gov/projects/gap/cgi-bin/analysis.cgi?id=pha000110">http://www.ncbi.nlm.nih.gov/projects/gap/cgi-bin/analysis.cgi?id=pha000110</a> |
| Metabolic    | Adiposity | allbmi2406          | adj bmi, offsp 6 & cohort 24 exams                                      | <a href="http://www.ncbi.nlm.nih.gov/projects/gap/cgi-bin/analysis.cgi?id=pha000112">http://www.ncbi.nlm.nih.gov/projects/gap/cgi-bin/analysis.cgi?id=pha000112</a> |
| Metabolic    | Adiposity | allbmi2607          | adj bmi, offsp 7 & cohort 26 exams                                      | <a href="http://www.ncbi.nlm.nih.gov/projects/gap/cgi-bin/analysis.cgi?id=pha000114">http://www.ncbi.nlm.nih.gov/projects/gap/cgi-bin/analysis.cgi?id=pha000114</a> |
| Metabolic    | Adiposity | allchgmbi           | adj bmi change, offsp 1-7 & cohort exams 10-26                          | <a href="http://www.ncbi.nlm.nih.gov/projects/gap/cgi-bin/analysis.cgi?id=pha000116">http://www.ncbi.nlm.nih.gov/projects/gap/cgi-bin/analysis.cgi?id=pha000116</a> |
| Metabolic    | Adiposity | allchgwt            | adj weight change, offsp 1-7 & cohort exams 10-26                       | <a href="http://www.ncbi.nlm.nih.gov/projects/gap/cgi-bin/analysis.cgi?id=pha000118">http://www.ncbi.nlm.nih.gov/projects/gap/cgi-bin/analysis.cgi?id=pha000118</a> |
| Metabolic    | Adiposity | allhgt1602          | adj height, offsp 2 & cohort 16 exams                                   | <a href="http://www.ncbi.nlm.nih.gov/projects/gap/cgi-bin/analysis.cgi?id=pha000120">http://www.ncbi.nlm.nih.gov/projects/gap/cgi-bin/analysis.cgi?id=pha000120</a> |
| Metabolic    | Adiposity | allhgt1803          | adj height, offsp 3 & cohort 18 exams                                   | <a href="http://www.ncbi.nlm.nih.gov/projects/gap/cgi-bin/analysis.cgi?id=pha000122">http://www.ncbi.nlm.nih.gov/projects/gap/cgi-bin/analysis.cgi?id=pha000122</a> |
| Metabolic    | Adiposity | allhgt1x01          | adj height, offsp 1 & cohort 10 exams                                   | <a href="http://www.ncbi.nlm.nih.gov/projects/gap/cgi-bin/analysis.cgi?id=pha000124">http://www.ncbi.nlm.nih.gov/projects/gap/cgi-bin/analysis.cgi?id=pha000124</a> |
| Metabolic    | Adiposity | allhgt2004          | adj height, offsp 4 & cohort 20 exams                                   | <a href="http://www.ncbi.nlm.nih.gov/projects/gap/cgi-bin/analysis.cgi?id=pha000126">http://www.ncbi.nlm.nih.gov/projects/gap/cgi-bin/analysis.cgi?id=pha000126</a> |
| Metabolic    | Adiposity | allhgt2205          | adj height, offsp 5 & cohort 22 exams                                   | <a href="http://www.ncbi.nlm.nih.gov/projects/gap/cgi-bin/analysis.cgi?id=pha000128">http://www.ncbi.nlm.nih.gov/projects/gap/cgi-bin/analysis.cgi?id=pha000128</a> |
| Metabolic    | Adiposity | allhgt2406          | adj height, offsp 6 & cohort 24 exams                                   | <a href="http://www.ncbi.nlm.nih.gov/projects/gap/cgi-bin/analysis.cgi?id=pha000130">http://www.ncbi.nlm.nih.gov/projects/gap/cgi-bin/analysis.cgi?id=pha000130</a> |
| Metabolic    | Adiposity | allhgt2607          | adj height, offsp 7 & cohort 26 exams                                   | <a href="http://www.ncbi.nlm.nih.gov/projects/gap/cgi-bin/analysis.cgi?id=pha000132">http://www.ncbi.nlm.nih.gov/projects/gap/cgi-bin/analysis.cgi?id=pha000132</a> |
| Metabolic    | Adiposity | allmeanbmi          | adj mean bmi, offsp 1-7 & cohort 10,16,18,20,22,24,26 exams             | <a href="http://www.ncbi.nlm.nih.gov/projects/gap/cgi-bin/analysis.cgi?id=pha000134">http://www.ncbi.nlm.nih.gov/projects/gap/cgi-bin/analysis.cgi?id=pha000134</a> |
| Metabolic    | Adiposity | allmeanhgt          | adj mean height, offsp 1-7 & cohort 10,16,18,20,22,24,26 exams          | <a href="http://www.ncbi.nlm.nih.gov/projects/gap/cgi-bin/analysis.cgi?id=pha000136">http://www.ncbi.nlm.nih.gov/projects/gap/cgi-bin/analysis.cgi?id=pha000136</a> |
| Metabolic    | Adiposity | allmeanwgt          | adj mean weight, offsp 1-7 & cohort 10,16,18,20,22,24,26 exams          | <a href="http://www.ncbi.nlm.nih.gov/projects/gap/cgi-bin/analysis.cgi?id=pha000138">http://www.ncbi.nlm.nih.gov/projects/gap/cgi-bin/analysis.cgi?id=pha000138</a> |
| Metabolic    | Adiposity | allochgwt           | adj waist change, offsp 4 to 7                                          | <a href="http://www.ncbi.nlm.nih.gov/projects/gap/cgi-bin/analysis.cgi?id=pha000140">http://www.ncbi.nlm.nih.gov/projects/gap/cgi-bin/analysis.cgi?id=pha000140</a> |
| Metabolic    | Adiposity | allomeanwst         | adj mean waist, offsp 4 to 7                                            | <a href="http://www.ncbi.nlm.nih.gov/projects/gap/cgi-bin/analysis.cgi?id=pha000142">http://www.ncbi.nlm.nih.gov/projects/gap/cgi-bin/analysis.cgi?id=pha000142</a> |
| Metabolic    | Adiposity | allowst0007         | adj waist, offsp 7                                                      | <a href="http://www.ncbi.nlm.nih.gov/projects/gap/cgi-bin/analysis.cgi?id=pha000144">http://www.ncbi.nlm.nih.gov/projects/gap/cgi-bin/analysis.cgi?id=pha000144</a> |
| Metabolic    | Adiposity | allrankbmi1602      | rank adj bmi, offsp 2 & cohort 16 exams                                 | <a href="http://www.ncbi.nlm.nih.gov/projects/gap/cgi-bin/analysis.cgi?id=pha000146">http://www.ncbi.nlm.nih.gov/projects/gap/cgi-bin/analysis.cgi?id=pha000146</a> |
| Metabolic    | Adiposity | allrankbmi1803      | rank adj bmi, offsp 3 & cohort 18 exams                                 | <a href="http://www.ncbi.nlm.nih.gov/projects/gap/cgi-bin/analysis.cgi?id=pha000148">http://www.ncbi.nlm.nih.gov/projects/gap/cgi-bin/analysis.cgi?id=pha000148</a> |
| Metabolic    | Adiposity | allrankbmi1x01      | rank adj bmi, offsp 1 & cohort 10 exams                                 | <a href="http://www.ncbi.nlm.nih.gov/projects/gap/cgi-bin/analysis.cgi?id=pha000150">http://www.ncbi.nlm.nih.gov/projects/gap/cgi-bin/analysis.cgi?id=pha000150</a> |
| Metabolic    | Adiposity | allrankbmi2004      | rank adj bmi, offsp 4 & cohort 20 exams                                 | <a href="http://www.ncbi.nlm.nih.gov/projects/gap/cgi-bin/analysis.cgi?id=pha000152">http://www.ncbi.nlm.nih.gov/projects/gap/cgi-bin/analysis.cgi?id=pha000152</a> |
| Metabolic    | Adiposity | allrankbmi2205      | rank adj bmi, offsp 5 & cohort 22 exams                                 | <a href="http://www.ncbi.nlm.nih.gov/projects/gap/cgi-bin/analysis.cgi?id=pha000154">http://www.ncbi.nlm.nih.gov/projects/gap/cgi-bin/analysis.cgi?id=pha000154</a> |
| Metabolic    | Adiposity | allrankbmi2406      | rank adj bmi, offsp 6 & cohort 24 exams                                 | <a href="http://www.ncbi.nlm.nih.gov/projects/gap/cgi-bin/analysis.cgi?id=pha000156">http://www.ncbi.nlm.nih.gov/projects/gap/cgi-bin/analysis.cgi?id=pha000156</a> |
| Metabolic    | Adiposity | allrankbmi2607      | rank adj bmi, offsp 7 & cohort 26 exams                                 | <a href="http://www.ncbi.nlm.nih.gov/projects/gap/cgi-bin/analysis.cgi?id=pha000158">http://www.ncbi.nlm.nih.gov/projects/gap/cgi-bin/analysis.cgi?id=pha000158</a> |
| Metabolic    | Adiposity | allrankchgmbi       | rank adj bmi change, offsp 1-7 & cohort exams 10-26                     | <a href="http://www.ncbi.nlm.nih.gov/projects/gap/cgi-bin/analysis.cgi?id=pha000160">http://www.ncbi.nlm.nih.gov/projects/gap/cgi-bin/analysis.cgi?id=pha000160</a> |
| Metabolic    | Adiposity | allrankchgwt        | rank adj weight change, offsp 1-7 & cohort exams 10-26                  | <a href="http://www.ncbi.nlm.nih.gov/projects/gap/cgi-bin/analysis.cgi?id=pha000162">http://www.ncbi.nlm.nih.gov/projects/gap/cgi-bin/analysis.cgi?id=pha000162</a> |
| Metabolic    | Adiposity | allrankmeanbmi      | rank adj mean bmi, offsp 1-7 & cohort 10,16,18,20,22,24,26 exams        | <a href="http://www.ncbi.nlm.nih.gov/projects/gap/cgi-bin/analysis.cgi?id=pha000164">http://www.ncbi.nlm.nih.gov/projects/gap/cgi-bin/analysis.cgi?id=pha000164</a> |
| Metabolic    | Adiposity | allrankmeanwgt      | rank adj mean weight, offsp 1-7 & cohort 10,16,18,20,22,24,26 exams     | <a href="http://www.ncbi.nlm.nih.gov/projects/gap/cgi-bin/analysis.cgi?id=pha000166">http://www.ncbi.nlm.nih.gov/projects/gap/cgi-bin/analysis.cgi?id=pha000166</a> |
| Metabolic    | Adiposity | allrankochgwt       | rank adj waist change, offsp 4 to 7                                     | <a href="http://www.ncbi.nlm.nih.gov/projects/gap/cgi-bin/analysis.cgi?id=pha000168">http://www.ncbi.nlm.nih.gov/projects/gap/cgi-bin/analysis.cgi?id=pha000168</a> |
| Metabolic    | Adiposity | allrankomeanwst     | rank adj mean waist, offsp 4 to 7                                       | <a href="http://www.ncbi.nlm.nih.gov/projects/gap/cgi-bin/analysis.cgi?id=pha000170">http://www.ncbi.nlm.nih.gov/projects/gap/cgi-bin/analysis.cgi?id=pha000170</a> |
| Metabolic    | Adiposity | allrankwgt1602      | rank adj weight, offsp 2 & cohort 16 exams                              | <a href="http://www.ncbi.nlm.nih.gov/projects/gap/cgi-bin/analysis.cgi?id=pha000172">http://www.ncbi.nlm.nih.gov/projects/gap/cgi-bin/analysis.cgi?id=pha000172</a> |
| Metabolic    | Adiposity | allrankwgt1803      | rank adj weight, offsp 3 & cohort 18 exams                              | <a href="http://www.ncbi.nlm.nih.gov/projects/gap/cgi-bin/analysis.cgi?id=pha000174">http://www.ncbi.nlm.nih.gov/projects/gap/cgi-bin/analysis.cgi?id=pha000174</a> |
| Metabolic    | Adiposity | allrankwgt1x01      | rank adj weight, offsp 1 & cohort 10 exams                              | <a href="http://www.ncbi.nlm.nih.gov/projects/gap/cgi-bin/analysis.cgi?id=pha000176">http://www.ncbi.nlm.nih.gov/projects/gap/cgi-bin/analysis.cgi?id=pha000176</a> |
| Metabolic    | Adiposity | allrankwgt2004      | rank adj weight, offsp 4 & cohort 20 exams                              | <a href="http://www.ncbi.nlm.nih.gov/projects/gap/cgi-bin/analysis.cgi?id=pha000178">http://www.ncbi.nlm.nih.gov/projects/gap/cgi-bin/analysis.cgi?id=pha000178</a> |
| Metabolic    | Adiposity | allrankwgt2205      | rank adj weight, offsp 5 & cohort 22 exams                              | <a href="http://www.ncbi.nlm.nih.gov/projects/gap/cgi-bin/analysis.cgi?id=pha000180">http://www.ncbi.nlm.nih.gov/projects/gap/cgi-bin/analysis.cgi?id=pha000180</a> |
| Metabolic    | Adiposity | allrankwgt2406      | rank adj weight, offsp 6 & cohort 24 exams                              | <a href="http://www.ncbi.nlm.nih.gov/projects/gap/cgi-bin/analysis.cgi?id=pha000182">http://www.ncbi.nlm.nih.gov/projects/gap/cgi-bin/analysis.cgi?id=pha000182</a> |
| Metabolic    | Adiposity | allrankwgt2607      | rank adj weight, offsp 7 & cohort 26 exams                              | <a href="http://www.ncbi.nlm.nih.gov/projects/gap/cgi-bin/analysis.cgi?id=pha000184">http://www.ncbi.nlm.nih.gov/projects/gap/cgi-bin/analysis.cgi?id=pha000184</a> |
| Metabolic    | Adiposity | allrankwst2306      | rank adj waist, offsp 6 & cohort exam 23                                | <a href="http://www.ncbi.nlm.nih.gov/projects/gap/cgi-bin/analysis.cgi?id=pha000186">http://www.ncbi.nlm.nih.gov/projects/gap/cgi-bin/analysis.cgi?id=pha000186</a> |
| Metabolic    | Adiposity | allwgt1602          | adj weight, offsp 2 & cohort 16 exams                                   | <a href="http://www.ncbi.nlm.nih.gov/projects/gap/cgi-bin/analysis.cgi?id=pha000188">http://www.ncbi.nlm.nih.gov/projects/gap/cgi-bin/analysis.cgi?id=pha000188</a> |
| Metabolic    | Adiposity | allwgt1803          | adj weight, offsp 3 & cohort 18 exams                                   | <a href="http://www.ncbi.nlm.nih.gov/projects/gap/cgi-bin/analysis.cgi?id=pha000190">http://www.ncbi.nlm.nih.gov/projects/gap/cgi-bin/analysis.cgi?id=pha000190</a> |
| Metabolic    | Adiposity | allwgt1x01          | adj weight, offsp 1 & cohort 10 exams                                   | <a href="http://www.ncbi.nlm.nih.gov/projects/gap/cgi-bin/analysis.cgi?id=pha000192">http://www.ncbi.nlm.nih.gov/projects/gap/cgi-bin/analysis.cgi?id=pha000192</a> |
| Metabolic    | Adiposity | allwgt2004          | adj weight, offsp 4 & cohort 20 exams                                   | <a href="http://www.ncbi.nlm.nih.gov/projects/gap/cgi-bin/analysis.cgi?id=pha000194">http://www.ncbi.nlm.nih.gov/projects/gap/cgi-bin/analysis.cgi?id=pha000194</a> |
| Metabolic    | Adiposity | allwgt2205          | adj weight, offsp 5 & cohort 22 exams                                   | <a href="http://www.ncbi.nlm.nih.gov/projects/gap/cgi-bin/analysis.cgi?id=pha000196">http://www.ncbi.nlm.nih.gov/projects/gap/cgi-bin/analysis.cgi?id=pha000196</a> |
| Metabolic    | Adiposity | allwgt2406          | adj weight, offsp 6 & cohort 24 exams                                   | <a href="http://www.ncbi.nlm.nih.gov/projects/gap/cgi-bin/analysis.cgi?id=pha000198">http://www.ncbi.nlm.nih.gov/projects/gap/cgi-bin/analysis.cgi?id=pha000198</a> |
| Metabolic    | Adiposity | allwgt2607          | adj weight, offsp 7 & cohort 26 exams                                   | <a href="http://www.ncbi.nlm.nih.gov/projects/gap/cgi-bin/analysis.cgi?id=pha000200">http://www.ncbi.nlm.nih.gov/projects/gap/cgi-bin/analysis.cgi?id=pha000200</a> |
| Metabolic    | Adiposity | allwst2004          | adj waist, offsp 4 & cohort 20 exams                                    | <a href="http://www.ncbi.nlm.nih.gov/projects/gap/cgi-bin/analysis.cgi?id=pha000202">http://www.ncbi.nlm.nih.gov/projects/gap/cgi-bin/analysis.cgi?id=pha000202</a> |

Online Table 1: Phenotypes Evaluated for Association using Population-based Analysis (GEE)

| Group     | Category  | Trait Label     | Name                                                                       | GEE Link                                                                                                                                                            |
|-----------|-----------|-----------------|----------------------------------------------------------------------------|---------------------------------------------------------------------------------------------------------------------------------------------------------------------|
| Metabolic | Adiposity | allwst2205      | adj waist, offsp 5 & cohort 22 exams                                       | <a href="http://www.ncbi.nlm.nih.gov/projects/gap/cgi-bin/analysis.cgi?id=pha000204">http://www.ncbi.nlm.nih.gov/projects/gap/cgi-bin/analysis.cgi?id=pha000204</a> |
| Metabolic | Adiposity | allwst2306      | adj waist, offsp 6 & cohort exam 23                                        | <a href="http://www.ncbi.nlm.nih.gov/projects/gap/cgi-bin/analysis.cgi?id=pha000206">http://www.ncbi.nlm.nih.gov/projects/gap/cgi-bin/analysis.cgi?id=pha000206</a> |
| Metabolic | Adiposity | fembmi1602      | Female adj bmi, offsp 2 & cohort 16 exams                                  | <a href="http://www.ncbi.nlm.nih.gov/projects/gap/cgi-bin/analysis.cgi?id=pha000208">http://www.ncbi.nlm.nih.gov/projects/gap/cgi-bin/analysis.cgi?id=pha000208</a> |
| Metabolic | Adiposity | fembmi1803      | Female adj bmi, offsp 3 & cohort 18 exams                                  | <a href="http://www.ncbi.nlm.nih.gov/projects/gap/cgi-bin/analysis.cgi?id=pha000210">http://www.ncbi.nlm.nih.gov/projects/gap/cgi-bin/analysis.cgi?id=pha000210</a> |
| Metabolic | Adiposity | fembmi1x01      | Female adj bmi, offsp 1 & cohort 10 exams                                  | <a href="http://www.ncbi.nlm.nih.gov/projects/gap/cgi-bin/analysis.cgi?id=pha000212">http://www.ncbi.nlm.nih.gov/projects/gap/cgi-bin/analysis.cgi?id=pha000212</a> |
| Metabolic | Adiposity | fembmi2004      | Female adj bmi, offsp 4 & cohort 20 exams                                  | <a href="http://www.ncbi.nlm.nih.gov/projects/gap/cgi-bin/analysis.cgi?id=pha000214">http://www.ncbi.nlm.nih.gov/projects/gap/cgi-bin/analysis.cgi?id=pha000214</a> |
| Metabolic | Adiposity | fembmi2205      | Female adj bmi, offsp 5 & cohort 22 exams                                  | <a href="http://www.ncbi.nlm.nih.gov/projects/gap/cgi-bin/analysis.cgi?id=pha000216">http://www.ncbi.nlm.nih.gov/projects/gap/cgi-bin/analysis.cgi?id=pha000216</a> |
| Metabolic | Adiposity | fembmi2406      | Female adj bmi, offsp 6 & cohort 24 exams                                  | <a href="http://www.ncbi.nlm.nih.gov/projects/gap/cgi-bin/analysis.cgi?id=pha000218">http://www.ncbi.nlm.nih.gov/projects/gap/cgi-bin/analysis.cgi?id=pha000218</a> |
| Metabolic | Adiposity | fembmi2607      | Female adj bmi, offsp 7 & cohort 26 exams                                  | <a href="http://www.ncbi.nlm.nih.gov/projects/gap/cgi-bin/analysis.cgi?id=pha000220">http://www.ncbi.nlm.nih.gov/projects/gap/cgi-bin/analysis.cgi?id=pha000220</a> |
| Metabolic | Adiposity | femchgmbi       | Female adj bmi change, offsp 1-7 & cohort exams 10-26                      | <a href="http://www.ncbi.nlm.nih.gov/projects/gap/cgi-bin/analysis.cgi?id=pha000222">http://www.ncbi.nlm.nih.gov/projects/gap/cgi-bin/analysis.cgi?id=pha000222</a> |
| Metabolic | Adiposity | femchgwgt       | Female adj weight change, offsp 1-7 & cohort exams 10-26                   | <a href="http://www.ncbi.nlm.nih.gov/projects/gap/cgi-bin/analysis.cgi?id=pha000224">http://www.ncbi.nlm.nih.gov/projects/gap/cgi-bin/analysis.cgi?id=pha000224</a> |
| Metabolic | Adiposity | femhgt1602      | Female adj height, offsp 2 & cohort 16 exams                               | <a href="http://www.ncbi.nlm.nih.gov/projects/gap/cgi-bin/analysis.cgi?id=pha000226">http://www.ncbi.nlm.nih.gov/projects/gap/cgi-bin/analysis.cgi?id=pha000226</a> |
| Metabolic | Adiposity | femhgt1803      | Female adj height, offsp 3 & cohort 18 exams                               | <a href="http://www.ncbi.nlm.nih.gov/projects/gap/cgi-bin/analysis.cgi?id=pha000228">http://www.ncbi.nlm.nih.gov/projects/gap/cgi-bin/analysis.cgi?id=pha000228</a> |
| Metabolic | Adiposity | femhgt1x01      | Female adj height, offsp 1 & cohort 10 exams                               | <a href="http://www.ncbi.nlm.nih.gov/projects/gap/cgi-bin/analysis.cgi?id=pha000230">http://www.ncbi.nlm.nih.gov/projects/gap/cgi-bin/analysis.cgi?id=pha000230</a> |
| Metabolic | Adiposity | femhgt2004      | Female adj height, offsp 4 & cohort 20 exams                               | <a href="http://www.ncbi.nlm.nih.gov/projects/gap/cgi-bin/analysis.cgi?id=pha000232">http://www.ncbi.nlm.nih.gov/projects/gap/cgi-bin/analysis.cgi?id=pha000232</a> |
| Metabolic | Adiposity | femhgt2205      | Female adj height, offsp 5 & cohort 22 exams                               | <a href="http://www.ncbi.nlm.nih.gov/projects/gap/cgi-bin/analysis.cgi?id=pha000234">http://www.ncbi.nlm.nih.gov/projects/gap/cgi-bin/analysis.cgi?id=pha000234</a> |
| Metabolic | Adiposity | femhgt2406      | Female adj height, offsp 6 & cohort 24 exams                               | <a href="http://www.ncbi.nlm.nih.gov/projects/gap/cgi-bin/analysis.cgi?id=pha000236">http://www.ncbi.nlm.nih.gov/projects/gap/cgi-bin/analysis.cgi?id=pha000236</a> |
| Metabolic | Adiposity | femhgt2607      | Female adj height, offsp 7 & cohort 26 exams                               | <a href="http://www.ncbi.nlm.nih.gov/projects/gap/cgi-bin/analysis.cgi?id=pha000238">http://www.ncbi.nlm.nih.gov/projects/gap/cgi-bin/analysis.cgi?id=pha000238</a> |
| Metabolic | Adiposity | femmeanbmi      | Female adj mean bmi, offsp 1-7 & cohort 10,16,18,20,22,24,26 exams         | <a href="http://www.ncbi.nlm.nih.gov/projects/gap/cgi-bin/analysis.cgi?id=pha000240">http://www.ncbi.nlm.nih.gov/projects/gap/cgi-bin/analysis.cgi?id=pha000240</a> |
| Metabolic | Adiposity | femmeanhgt      | Female adj mean height, offsp 1-7 & cohort 10,16,18,20,22,24,26 exams      | <a href="http://www.ncbi.nlm.nih.gov/projects/gap/cgi-bin/analysis.cgi?id=pha000242">http://www.ncbi.nlm.nih.gov/projects/gap/cgi-bin/analysis.cgi?id=pha000242</a> |
| Metabolic | Adiposity | femmeanwgt      | Female adj mean weight, offsp 1-7 & cohort 10,16,18,20,22,24,26 exams      | <a href="http://www.ncbi.nlm.nih.gov/projects/gap/cgi-bin/analysis.cgi?id=pha000244">http://www.ncbi.nlm.nih.gov/projects/gap/cgi-bin/analysis.cgi?id=pha000244</a> |
| Metabolic | Adiposity | femochgwst      | Female adj waist change, offsp 4 to 7                                      | <a href="http://www.ncbi.nlm.nih.gov/projects/gap/cgi-bin/analysis.cgi?id=pha000246">http://www.ncbi.nlm.nih.gov/projects/gap/cgi-bin/analysis.cgi?id=pha000246</a> |
| Metabolic | Adiposity | femomeanwst     | Female adj mean waist, offsp 4 to 7                                        | <a href="http://www.ncbi.nlm.nih.gov/projects/gap/cgi-bin/analysis.cgi?id=pha000248">http://www.ncbi.nlm.nih.gov/projects/gap/cgi-bin/analysis.cgi?id=pha000248</a> |
| Metabolic | Adiposity | femowst0007     | Female adj waist, offsp 7                                                  | <a href="http://www.ncbi.nlm.nih.gov/projects/gap/cgi-bin/analysis.cgi?id=pha000250">http://www.ncbi.nlm.nih.gov/projects/gap/cgi-bin/analysis.cgi?id=pha000250</a> |
| Metabolic | Adiposity | femrankbmi1602  | Female rank adj bmi, offsp 2 & cohort 16 exams                             | <a href="http://www.ncbi.nlm.nih.gov/projects/gap/cgi-bin/analysis.cgi?id=pha000252">http://www.ncbi.nlm.nih.gov/projects/gap/cgi-bin/analysis.cgi?id=pha000252</a> |
| Metabolic | Adiposity | femrankbmi1803  | Female rank adj bmi, offsp 3 & cohort 18 exams                             | <a href="http://www.ncbi.nlm.nih.gov/projects/gap/cgi-bin/analysis.cgi?id=pha000254">http://www.ncbi.nlm.nih.gov/projects/gap/cgi-bin/analysis.cgi?id=pha000254</a> |
| Metabolic | Adiposity | femrankbmi1x01  | Female rank adj bmi, offsp 1 & cohort 10 exams                             | <a href="http://www.ncbi.nlm.nih.gov/projects/gap/cgi-bin/analysis.cgi?id=pha000256">http://www.ncbi.nlm.nih.gov/projects/gap/cgi-bin/analysis.cgi?id=pha000256</a> |
| Metabolic | Adiposity | femrankbmi2004  | Female rank adj bmi, offsp 4 & cohort 20 exams                             | <a href="http://www.ncbi.nlm.nih.gov/projects/gap/cgi-bin/analysis.cgi?id=pha000258">http://www.ncbi.nlm.nih.gov/projects/gap/cgi-bin/analysis.cgi?id=pha000258</a> |
| Metabolic | Adiposity | femrankbmi2205  | Female rank adj bmi, offsp 5 & cohort 22 exams                             | <a href="http://www.ncbi.nlm.nih.gov/projects/gap/cgi-bin/analysis.cgi?id=pha000260">http://www.ncbi.nlm.nih.gov/projects/gap/cgi-bin/analysis.cgi?id=pha000260</a> |
| Metabolic | Adiposity | femrankbmi2406  | Female rank adj bmi, offsp 6 & cohort 24 exams                             | <a href="http://www.ncbi.nlm.nih.gov/projects/gap/cgi-bin/analysis.cgi?id=pha000262">http://www.ncbi.nlm.nih.gov/projects/gap/cgi-bin/analysis.cgi?id=pha000262</a> |
| Metabolic | Adiposity | femrankbmi2607  | Female rank adj bmi, offsp 7 & cohort 26 exams                             | <a href="http://www.ncbi.nlm.nih.gov/projects/gap/cgi-bin/analysis.cgi?id=pha000264">http://www.ncbi.nlm.nih.gov/projects/gap/cgi-bin/analysis.cgi?id=pha000264</a> |
| Metabolic | Adiposity | femrankchgwgt   | Female rank adj weight change, offsp 1-7 & cohort exams 10-26              | <a href="http://www.ncbi.nlm.nih.gov/projects/gap/cgi-bin/analysis.cgi?id=pha000266">http://www.ncbi.nlm.nih.gov/projects/gap/cgi-bin/analysis.cgi?id=pha000266</a> |
| Metabolic | Adiposity | femrankmeanbmi  | Female rank adj mean bmi, offsp 1-7 & cohort 10,16,18,20,22,24,26 exams    | <a href="http://www.ncbi.nlm.nih.gov/projects/gap/cgi-bin/analysis.cgi?id=pha000268">http://www.ncbi.nlm.nih.gov/projects/gap/cgi-bin/analysis.cgi?id=pha000268</a> |
| Metabolic | Adiposity | femrankmeanwgt  | Female rank adj mean weight, offsp 1-7 & cohort 10,16,18,20,22,24,26 exams | <a href="http://www.ncbi.nlm.nih.gov/projects/gap/cgi-bin/analysis.cgi?id=pha000270">http://www.ncbi.nlm.nih.gov/projects/gap/cgi-bin/analysis.cgi?id=pha000270</a> |
| Metabolic | Adiposity | femrankomeanwst | Female rank adj mean waist, offsp 4 to 7                                   | <a href="http://www.ncbi.nlm.nih.gov/projects/gap/cgi-bin/analysis.cgi?id=pha000272">http://www.ncbi.nlm.nih.gov/projects/gap/cgi-bin/analysis.cgi?id=pha000272</a> |
| Metabolic | Adiposity | femrankwgt1602  | Female rank adj weight, offsp 2 & cohort 16 exams                          | <a href="http://www.ncbi.nlm.nih.gov/projects/gap/cgi-bin/analysis.cgi?id=pha000274">http://www.ncbi.nlm.nih.gov/projects/gap/cgi-bin/analysis.cgi?id=pha000274</a> |
| Metabolic | Adiposity | femrankwgt1803  | Female rank adj weight, offsp 3 & cohort 18 exams                          | <a href="http://www.ncbi.nlm.nih.gov/projects/gap/cgi-bin/analysis.cgi?id=pha000276">http://www.ncbi.nlm.nih.gov/projects/gap/cgi-bin/analysis.cgi?id=pha000276</a> |
| Metabolic | Adiposity | femrankwgt1x01  | Female rank adj weight, offsp 1 & cohort 10 exams                          | <a href="http://www.ncbi.nlm.nih.gov/projects/gap/cgi-bin/analysis.cgi?id=pha000278">http://www.ncbi.nlm.nih.gov/projects/gap/cgi-bin/analysis.cgi?id=pha000278</a> |
| Metabolic | Adiposity | femrankwgt2004  | Female rank adj weight, offsp 4 & cohort 20 exams                          | <a href="http://www.ncbi.nlm.nih.gov/projects/gap/cgi-bin/analysis.cgi?id=pha000280">http://www.ncbi.nlm.nih.gov/projects/gap/cgi-bin/analysis.cgi?id=pha000280</a> |
| Metabolic | Adiposity | femrankwgt2205  | Female rank adj weight, offsp 5 & cohort 22 exams                          | <a href="http://www.ncbi.nlm.nih.gov/projects/gap/cgi-bin/analysis.cgi?id=pha000282">http://www.ncbi.nlm.nih.gov/projects/gap/cgi-bin/analysis.cgi?id=pha000282</a> |
| Metabolic | Adiposity | femrankwgt2406  | Female rank adj weight, offsp 6 & cohort 24 exams                          | <a href="http://www.ncbi.nlm.nih.gov/projects/gap/cgi-bin/analysis.cgi?id=pha000284">http://www.ncbi.nlm.nih.gov/projects/gap/cgi-bin/analysis.cgi?id=pha000284</a> |
| Metabolic | Adiposity | femrankwgt2607  | Female rank adj weight, offsp 7 & cohort 26 exams                          | <a href="http://www.ncbi.nlm.nih.gov/projects/gap/cgi-bin/analysis.cgi?id=pha000286">http://www.ncbi.nlm.nih.gov/projects/gap/cgi-bin/analysis.cgi?id=pha000286</a> |
| Metabolic | Adiposity | femwgt1602      | Female adj weight, offsp 2 & cohort 16 exams                               | <a href="http://www.ncbi.nlm.nih.gov/projects/gap/cgi-bin/analysis.cgi?id=pha000288">http://www.ncbi.nlm.nih.gov/projects/gap/cgi-bin/analysis.cgi?id=pha000288</a> |
| Metabolic | Adiposity | femwgt1803      | Female adj weight, offsp 3 & cohort 18 exams                               | <a href="http://www.ncbi.nlm.nih.gov/projects/gap/cgi-bin/analysis.cgi?id=pha000290">http://www.ncbi.nlm.nih.gov/projects/gap/cgi-bin/analysis.cgi?id=pha000290</a> |
| Metabolic | Adiposity | femwgt1x01      | Female adj weight, offsp 1 & cohort 10 exams                               | <a href="http://www.ncbi.nlm.nih.gov/projects/gap/cgi-bin/analysis.cgi?id=pha000292">http://www.ncbi.nlm.nih.gov/projects/gap/cgi-bin/analysis.cgi?id=pha000292</a> |
| Metabolic | Adiposity | femwgt2004      | Female adj weight, offsp 4 & cohort 20 exams                               | <a href="http://www.ncbi.nlm.nih.gov/projects/gap/cgi-bin/analysis.cgi?id=pha000294">http://www.ncbi.nlm.nih.gov/projects/gap/cgi-bin/analysis.cgi?id=pha000294</a> |
| Metabolic | Adiposity | femwgt2205      | Female adj weight, offsp 5 & cohort 22 exams                               | <a href="http://www.ncbi.nlm.nih.gov/projects/gap/cgi-bin/analysis.cgi?id=pha000296">http://www.ncbi.nlm.nih.gov/projects/gap/cgi-bin/analysis.cgi?id=pha000296</a> |
| Metabolic | Adiposity | femwgt2406      | Female adj weight, offsp 6 & cohort 24 exams                               | <a href="http://www.ncbi.nlm.nih.gov/projects/gap/cgi-bin/analysis.cgi?id=pha000298">http://www.ncbi.nlm.nih.gov/projects/gap/cgi-bin/analysis.cgi?id=pha000298</a> |
| Metabolic | Adiposity | femwgt2607      | Female adj weight, offsp 7 & cohort 26 exams                               | <a href="http://www.ncbi.nlm.nih.gov/projects/gap/cgi-bin/analysis.cgi?id=pha000300">http://www.ncbi.nlm.nih.gov/projects/gap/cgi-bin/analysis.cgi?id=pha000300</a> |
| Metabolic | Adiposity | femwst2004      | Female adj waist, offsp 4 & cohort 20 exams                                | <a href="http://www.ncbi.nlm.nih.gov/projects/gap/cgi-bin/analysis.cgi?id=pha000302">http://www.ncbi.nlm.nih.gov/projects/gap/cgi-bin/analysis.cgi?id=pha000302</a> |
| Metabolic | Adiposity | femwst2205      | Female adj waist, offsp 5 & cohort 22 exams                                | <a href="http://www.ncbi.nlm.nih.gov/projects/gap/cgi-bin/analysis.cgi?id=pha000304">http://www.ncbi.nlm.nih.gov/projects/gap/cgi-bin/analysis.cgi?id=pha000304</a> |
| Metabolic | Adiposity | femwst2306      | Female adj waist, offsp 6 & cohort exam 23                                 | <a href="http://www.ncbi.nlm.nih.gov/projects/gap/cgi-bin/analysis.cgi?id=pha000306">http://www.ncbi.nlm.nih.gov/projects/gap/cgi-bin/analysis.cgi?id=pha000306</a> |
| Metabolic | Adiposity | malebmi1602     | Male adj bmi, offsp 2 & cohort 16 exams                                    | <a href="http://www.ncbi.nlm.nih.gov/projects/gap/cgi-bin/analysis.cgi?id=pha000308">http://www.ncbi.nlm.nih.gov/projects/gap/cgi-bin/analysis.cgi?id=pha000308</a> |
| Metabolic | Adiposity | malebmi1803     | Male adj bmi, offsp 3 & cohort 18 exams                                    | <a href="http://www.ncbi.nlm.nih.gov/projects/gap/cgi-bin/analysis.cgi?id=pha000310">http://www.ncbi.nlm.nih.gov/projects/gap/cgi-bin/analysis.cgi?id=pha000310</a> |
| Metabolic | Adiposity | malebmi1x01     | Male adj bmi, offsp 1 & cohort 10 exams                                    | <a href="http://www.ncbi.nlm.nih.gov/projects/gap/cgi-bin/analysis.cgi?id=pha000312">http://www.ncbi.nlm.nih.gov/projects/gap/cgi-bin/analysis.cgi?id=pha000312</a> |

Online Table 1: Phenotypes Evaluated for Association using Population-based Analysis (GEE)

| Group     | Category  | Trait Label        | Name                                                                       | GEE Link                                                                                                                                                            |
|-----------|-----------|--------------------|----------------------------------------------------------------------------|---------------------------------------------------------------------------------------------------------------------------------------------------------------------|
| Metabolic | Adiposity | malebmi2004        | Male adj bmi, offsp 4 & cohort 20 exams                                    | <a href="http://www.ncbi.nlm.nih.gov/projects/gap/cgi-bin/analysis.cgi?id=pha000314">http://www.ncbi.nlm.nih.gov/projects/gap/cgi-bin/analysis.cgi?id=pha000314</a> |
| Metabolic | Adiposity | malebmi2205        | Male adj bmi, offsp 5 & cohort 22 exams                                    | <a href="http://www.ncbi.nlm.nih.gov/projects/gap/cgi-bin/analysis.cgi?id=pha000316">http://www.ncbi.nlm.nih.gov/projects/gap/cgi-bin/analysis.cgi?id=pha000316</a> |
| Metabolic | Adiposity | malebmi2406        | Male adj bmi, offsp 6 & cohort 24 exams                                    | <a href="http://www.ncbi.nlm.nih.gov/projects/gap/cgi-bin/analysis.cgi?id=pha000318">http://www.ncbi.nlm.nih.gov/projects/gap/cgi-bin/analysis.cgi?id=pha000318</a> |
| Metabolic | Adiposity | malebmi2607        | Male adj bmi, offsp 7 & cohort 26 exams                                    | <a href="http://www.ncbi.nlm.nih.gov/projects/gap/cgi-bin/analysis.cgi?id=pha000320">http://www.ncbi.nlm.nih.gov/projects/gap/cgi-bin/analysis.cgi?id=pha000320</a> |
| Metabolic | Adiposity | malechgbmi         | Male adj bmi change, offsp 1-7 & cohort exams 10-26                        | <a href="http://www.ncbi.nlm.nih.gov/projects/gap/cgi-bin/analysis.cgi?id=pha000322">http://www.ncbi.nlm.nih.gov/projects/gap/cgi-bin/analysis.cgi?id=pha000322</a> |
| Metabolic | Adiposity | malechgwt          | Male adj weight change, offsp 1-7 & cohort exams 10-26                     | <a href="http://www.ncbi.nlm.nih.gov/projects/gap/cgi-bin/analysis.cgi?id=pha000324">http://www.ncbi.nlm.nih.gov/projects/gap/cgi-bin/analysis.cgi?id=pha000324</a> |
| Metabolic | Adiposity | malehgt1602        | Male adj height, offsp 2 & cohort 16 exams                                 | <a href="http://www.ncbi.nlm.nih.gov/projects/gap/cgi-bin/analysis.cgi?id=pha000326">http://www.ncbi.nlm.nih.gov/projects/gap/cgi-bin/analysis.cgi?id=pha000326</a> |
| Metabolic | Adiposity | malehgt1803        | Male adj height, offsp 3 & cohort 18 exams                                 | <a href="http://www.ncbi.nlm.nih.gov/projects/gap/cgi-bin/analysis.cgi?id=pha000328">http://www.ncbi.nlm.nih.gov/projects/gap/cgi-bin/analysis.cgi?id=pha000328</a> |
| Metabolic | Adiposity | malehgt1x01        | Male adj height, offsp 1 & cohort 10 exams                                 | <a href="http://www.ncbi.nlm.nih.gov/projects/gap/cgi-bin/analysis.cgi?id=pha000330">http://www.ncbi.nlm.nih.gov/projects/gap/cgi-bin/analysis.cgi?id=pha000330</a> |
| Metabolic | Adiposity | malehgt2004        | Male adj height, offsp 4 & cohort 20 exams                                 | <a href="http://www.ncbi.nlm.nih.gov/projects/gap/cgi-bin/analysis.cgi?id=pha000332">http://www.ncbi.nlm.nih.gov/projects/gap/cgi-bin/analysis.cgi?id=pha000332</a> |
| Metabolic | Adiposity | malehgt2205        | Male adj height, offsp 5 & cohort 22 exams                                 | <a href="http://www.ncbi.nlm.nih.gov/projects/gap/cgi-bin/analysis.cgi?id=pha000334">http://www.ncbi.nlm.nih.gov/projects/gap/cgi-bin/analysis.cgi?id=pha000334</a> |
| Metabolic | Adiposity | malehgt2406        | Male adj height, offsp 6 & cohort 24 exams                                 | <a href="http://www.ncbi.nlm.nih.gov/projects/gap/cgi-bin/analysis.cgi?id=pha000336">http://www.ncbi.nlm.nih.gov/projects/gap/cgi-bin/analysis.cgi?id=pha000336</a> |
| Metabolic | Adiposity | malehgt2607        | Male adj height, offsp 7 & cohort 26 exams                                 | <a href="http://www.ncbi.nlm.nih.gov/projects/gap/cgi-bin/analysis.cgi?id=pha000338">http://www.ncbi.nlm.nih.gov/projects/gap/cgi-bin/analysis.cgi?id=pha000338</a> |
| Metabolic | Adiposity | malemeanbmi        | Male adj mean bmi, offsp 1-7 & cohort 10,16,18,20,22,24,26 exams           | <a href="http://www.ncbi.nlm.nih.gov/projects/gap/cgi-bin/analysis.cgi?id=pha000340">http://www.ncbi.nlm.nih.gov/projects/gap/cgi-bin/analysis.cgi?id=pha000340</a> |
| Metabolic | Adiposity | malemeanhgt        | Male adj mean hgt, offsp 1-7 & cohort 10,16,18,20,22,24,26 exams           | <a href="http://www.ncbi.nlm.nih.gov/projects/gap/cgi-bin/analysis.cgi?id=pha000342">http://www.ncbi.nlm.nih.gov/projects/gap/cgi-bin/analysis.cgi?id=pha000342</a> |
| Metabolic | Adiposity | malemeanwgt        | Male adj mean weight, offsp 1-7 & cohort 10,16,18,20,22,24,26 exams        | <a href="http://www.ncbi.nlm.nih.gov/projects/gap/cgi-bin/analysis.cgi?id=pha000344">http://www.ncbi.nlm.nih.gov/projects/gap/cgi-bin/analysis.cgi?id=pha000344</a> |
| Metabolic | Adiposity | maleochgwst        | Male adj waist change, offsp 4 to 7                                        | <a href="http://www.ncbi.nlm.nih.gov/projects/gap/cgi-bin/analysis.cgi?id=pha000346">http://www.ncbi.nlm.nih.gov/projects/gap/cgi-bin/analysis.cgi?id=pha000346</a> |
| Metabolic | Adiposity | maleomeanwst       | Male adj mean waist, offsp 4 to 7                                          | <a href="http://www.ncbi.nlm.nih.gov/projects/gap/cgi-bin/analysis.cgi?id=pha000348">http://www.ncbi.nlm.nih.gov/projects/gap/cgi-bin/analysis.cgi?id=pha000348</a> |
| Metabolic | Adiposity | maleowst0007       | Male adj waist, offsp 7                                                    | <a href="http://www.ncbi.nlm.nih.gov/projects/gap/cgi-bin/analysis.cgi?id=pha000350">http://www.ncbi.nlm.nih.gov/projects/gap/cgi-bin/analysis.cgi?id=pha000350</a> |
| Metabolic | Adiposity | malerankbmi1602    | Male rank adj bmi, offsp 2 & cohort 16 exams                               | <a href="http://www.ncbi.nlm.nih.gov/projects/gap/cgi-bin/analysis.cgi?id=pha000352">http://www.ncbi.nlm.nih.gov/projects/gap/cgi-bin/analysis.cgi?id=pha000352</a> |
| Metabolic | Adiposity | malerankbmi1803    | Male rank adj bmi, offsp 3 & cohort 18 exams                               | <a href="http://www.ncbi.nlm.nih.gov/projects/gap/cgi-bin/analysis.cgi?id=pha000354">http://www.ncbi.nlm.nih.gov/projects/gap/cgi-bin/analysis.cgi?id=pha000354</a> |
| Metabolic | Adiposity | malerankbmi2004    | Male rank adj bmi, offsp 4 & cohort 20 exams                               | <a href="http://www.ncbi.nlm.nih.gov/projects/gap/cgi-bin/analysis.cgi?id=pha000356">http://www.ncbi.nlm.nih.gov/projects/gap/cgi-bin/analysis.cgi?id=pha000356</a> |
| Metabolic | Adiposity | malerankbmi2205    | Male rank adj bmi, offsp 5 & cohort 22 exams                               | <a href="http://www.ncbi.nlm.nih.gov/projects/gap/cgi-bin/analysis.cgi?id=pha000358">http://www.ncbi.nlm.nih.gov/projects/gap/cgi-bin/analysis.cgi?id=pha000358</a> |
| Metabolic | Adiposity | malerankbmi2406    | Male rank adj bmi, offsp 6 & cohort 24 exams                               | <a href="http://www.ncbi.nlm.nih.gov/projects/gap/cgi-bin/analysis.cgi?id=pha000360">http://www.ncbi.nlm.nih.gov/projects/gap/cgi-bin/analysis.cgi?id=pha000360</a> |
| Metabolic | Adiposity | malerankbmi2607    | Male rank adj bmi, offsp 7 & cohort 26 exams                               | <a href="http://www.ncbi.nlm.nih.gov/projects/gap/cgi-bin/analysis.cgi?id=pha000362">http://www.ncbi.nlm.nih.gov/projects/gap/cgi-bin/analysis.cgi?id=pha000362</a> |
| Metabolic | Adiposity | malerankchgbmi     | Male rank adj bmi change, offsp 1-7 & cohort exams 10-26                   | <a href="http://www.ncbi.nlm.nih.gov/projects/gap/cgi-bin/analysis.cgi?id=pha000364">http://www.ncbi.nlm.nih.gov/projects/gap/cgi-bin/analysis.cgi?id=pha000364</a> |
| Metabolic | Adiposity | malerankchgwt      | Male rank adj weight change, offsp 1-7 & cohort exams 10-26                | <a href="http://www.ncbi.nlm.nih.gov/projects/gap/cgi-bin/analysis.cgi?id=pha000366">http://www.ncbi.nlm.nih.gov/projects/gap/cgi-bin/analysis.cgi?id=pha000366</a> |
| Metabolic | Adiposity | malerankhgt2406    | Male rank adj height, offsp 6 & cohort 24 exams                            | <a href="http://www.ncbi.nlm.nih.gov/projects/gap/cgi-bin/analysis.cgi?id=pha000368">http://www.ncbi.nlm.nih.gov/projects/gap/cgi-bin/analysis.cgi?id=pha000368</a> |
| Metabolic | Adiposity | malerankochgwst    | Male rank adj waist change, offsp 4 to 7                                   | <a href="http://www.ncbi.nlm.nih.gov/projects/gap/cgi-bin/analysis.cgi?id=pha000370">http://www.ncbi.nlm.nih.gov/projects/gap/cgi-bin/analysis.cgi?id=pha000370</a> |
| Metabolic | Adiposity | malerankwgt1602    | Male rank adj weight, offsp 2 & cohort 16 exams                            | <a href="http://www.ncbi.nlm.nih.gov/projects/gap/cgi-bin/analysis.cgi?id=pha000372">http://www.ncbi.nlm.nih.gov/projects/gap/cgi-bin/analysis.cgi?id=pha000372</a> |
| Metabolic | Adiposity | malerankwgt2004    | Male rank adj weight, offsp 4 & cohort 20 exams                            | <a href="http://www.ncbi.nlm.nih.gov/projects/gap/cgi-bin/analysis.cgi?id=pha000374">http://www.ncbi.nlm.nih.gov/projects/gap/cgi-bin/analysis.cgi?id=pha000374</a> |
| Metabolic | Adiposity | malerankwgt2205    | Male rank adj weight, offsp 5 & cohort 22 exams                            | <a href="http://www.ncbi.nlm.nih.gov/projects/gap/cgi-bin/analysis.cgi?id=pha000376">http://www.ncbi.nlm.nih.gov/projects/gap/cgi-bin/analysis.cgi?id=pha000376</a> |
| Metabolic | Adiposity | malerankwst2306    | Male rank adj waist, offsp 6 & cohort exam 23                              | <a href="http://www.ncbi.nlm.nih.gov/projects/gap/cgi-bin/analysis.cgi?id=pha000378">http://www.ncbi.nlm.nih.gov/projects/gap/cgi-bin/analysis.cgi?id=pha000378</a> |
| Metabolic | Adiposity | malewgt1602        | Male adj weight, offsp 2 & cohort 16 exams                                 | <a href="http://www.ncbi.nlm.nih.gov/projects/gap/cgi-bin/analysis.cgi?id=pha000380">http://www.ncbi.nlm.nih.gov/projects/gap/cgi-bin/analysis.cgi?id=pha000380</a> |
| Metabolic | Adiposity | malewgt1803        | Male adj weight, offsp 3 & cohort 18 exams                                 | <a href="http://www.ncbi.nlm.nih.gov/projects/gap/cgi-bin/analysis.cgi?id=pha000382">http://www.ncbi.nlm.nih.gov/projects/gap/cgi-bin/analysis.cgi?id=pha000382</a> |
| Metabolic | Adiposity | malewgt1x01        | Male adj weight, offsp 1 & cohort 10 exams                                 | <a href="http://www.ncbi.nlm.nih.gov/projects/gap/cgi-bin/analysis.cgi?id=pha000384">http://www.ncbi.nlm.nih.gov/projects/gap/cgi-bin/analysis.cgi?id=pha000384</a> |
| Metabolic | Adiposity | malewgt2004        | Male adj weight, offsp 4 & cohort 20 exams                                 | <a href="http://www.ncbi.nlm.nih.gov/projects/gap/cgi-bin/analysis.cgi?id=pha000386">http://www.ncbi.nlm.nih.gov/projects/gap/cgi-bin/analysis.cgi?id=pha000386</a> |
| Metabolic | Adiposity | malewgt2205        | Male adj weight, offsp 5 & cohort 22 exams                                 | <a href="http://www.ncbi.nlm.nih.gov/projects/gap/cgi-bin/analysis.cgi?id=pha000388">http://www.ncbi.nlm.nih.gov/projects/gap/cgi-bin/analysis.cgi?id=pha000388</a> |
| Metabolic | Adiposity | malewgt2406        | Male adj weight, offsp 6 & cohort 24 exams                                 | <a href="http://www.ncbi.nlm.nih.gov/projects/gap/cgi-bin/analysis.cgi?id=pha000390">http://www.ncbi.nlm.nih.gov/projects/gap/cgi-bin/analysis.cgi?id=pha000390</a> |
| Metabolic | Adiposity | malewgt2607        | Male adj weight, offsp 7 & cohort 26 exams                                 | <a href="http://www.ncbi.nlm.nih.gov/projects/gap/cgi-bin/analysis.cgi?id=pha000392">http://www.ncbi.nlm.nih.gov/projects/gap/cgi-bin/analysis.cgi?id=pha000392</a> |
| Metabolic | Adiposity | malewst2004        | Male adj waist, offsp 4 & cohort 20 exams                                  | <a href="http://www.ncbi.nlm.nih.gov/projects/gap/cgi-bin/analysis.cgi?id=pha000394">http://www.ncbi.nlm.nih.gov/projects/gap/cgi-bin/analysis.cgi?id=pha000394</a> |
| Metabolic | Adiposity | malewst2205        | Male adj waist, offsp 5 & cohort 22 exams                                  | <a href="http://www.ncbi.nlm.nih.gov/projects/gap/cgi-bin/analysis.cgi?id=pha000396">http://www.ncbi.nlm.nih.gov/projects/gap/cgi-bin/analysis.cgi?id=pha000396</a> |
| Metabolic | Adiposity | malewst2306        | Male adj waist, offsp 6 & cohort exam 23                                   | <a href="http://www.ncbi.nlm.nih.gov/projects/gap/cgi-bin/analysis.cgi?id=pha000398">http://www.ncbi.nlm.nih.gov/projects/gap/cgi-bin/analysis.cgi?id=pha000398</a> |
| Metabolic | Adiposity | SATAS              | SAT adj for age, age sqr, sex                                              | <a href="http://www.ncbi.nlm.nih.gov/projects/gap/cgi-bin/analysis.cgi?id=pha000400">http://www.ncbi.nlm.nih.gov/projects/gap/cgi-bin/analysis.cgi?id=pha000400</a> |
| Metabolic | Adiposity | SATMV              | SAT adj for age, age square, sex, meno status, smoking                     | <a href="http://www.ncbi.nlm.nih.gov/projects/gap/cgi-bin/analysis.cgi?id=pha000402">http://www.ncbi.nlm.nih.gov/projects/gap/cgi-bin/analysis.cgi?id=pha000402</a> |
| Metabolic | Adiposity | SDAS               | Sagittal diameter adj for age, age square, sex                             | <a href="http://www.ncbi.nlm.nih.gov/projects/gap/cgi-bin/analysis.cgi?id=pha000404">http://www.ncbi.nlm.nih.gov/projects/gap/cgi-bin/analysis.cgi?id=pha000404</a> |
| Metabolic | Adiposity | SDMV               | Sagittal diameter adj for age, age square, sex, meno status, smoking       | <a href="http://www.ncbi.nlm.nih.gov/projects/gap/cgi-bin/analysis.cgi?id=pha000406">http://www.ncbi.nlm.nih.gov/projects/gap/cgi-bin/analysis.cgi?id=pha000406</a> |
| Metabolic | Adiposity | VATAS              | VAT adj for age, age squared, sex                                          | <a href="http://www.ncbi.nlm.nih.gov/projects/gap/cgi-bin/analysis.cgi?id=pha000408">http://www.ncbi.nlm.nih.gov/projects/gap/cgi-bin/analysis.cgi?id=pha000408</a> |
| Metabolic | Adiposity | VATMV              | VAT adj for age, age squared, sex, meno status, smoking                    | <a href="http://www.ncbi.nlm.nih.gov/projects/gap/cgi-bin/analysis.cgi?id=pha000410">http://www.ncbi.nlm.nih.gov/projects/gap/cgi-bin/analysis.cgi?id=pha000410</a> |
| Metabolic | Adiposity | WCAS               | Waist by CT adj for age, age squared, sex                                  | <a href="http://www.ncbi.nlm.nih.gov/projects/gap/cgi-bin/analysis.cgi?id=pha000412">http://www.ncbi.nlm.nih.gov/projects/gap/cgi-bin/analysis.cgi?id=pha000412</a> |
| Metabolic | Adiposity | WCMV               | Waist by CT adj for age, age squared, sex, meno status, smoking            | <a href="http://www.ncbi.nlm.nih.gov/projects/gap/cgi-bin/analysis.cgi?id=pha000414">http://www.ncbi.nlm.nih.gov/projects/gap/cgi-bin/analysis.cgi?id=pha000414</a> |
| Metabolic | Glycemic  | DiabSurv1sexage    | Diabetes incidence to ex7, age-sex adjusted in FBAT, Cox model for GEE     | <a href="http://www.ncbi.nlm.nih.gov/projects/gap/cgi-bin/analysis.cgi?id=pha000416">http://www.ncbi.nlm.nih.gov/projects/gap/cgi-bin/analysis.cgi?id=pha000416</a> |
| Metabolic | Glycemic  | DiabSurv2sexagebmi | Diabetes incidence to ex7, age-sex-bmi adjusted in FBAT, Cox model for GEE | <a href="http://www.ncbi.nlm.nih.gov/projects/gap/cgi-bin/analysis.cgi?id=pha000418">http://www.ncbi.nlm.nih.gov/projects/gap/cgi-bin/analysis.cgi?id=pha000418</a> |
| Metabolic | Glycemic  | res1ladipoq7o      | Age-sex adjusted Adiponectin ex7 offspring                                 | <a href="http://www.ncbi.nlm.nih.gov/projects/gap/cgi-bin/analysis.cgi?id=pha000420">http://www.ncbi.nlm.nih.gov/projects/gap/cgi-bin/analysis.cgi?id=pha000420</a> |
| Metabolic | Glycemic  | res1flglu5o        | Age-sex adjusted Fasting Plasma Glucose ex5 offspring                      | <a href="http://www.ncbi.nlm.nih.gov/projects/gap/cgi-bin/analysis.cgi?id=pha000422">http://www.ncbi.nlm.nih.gov/projects/gap/cgi-bin/analysis.cgi?id=pha000422</a> |

Online Table 1: Phenotypes Evaluated for Association using Population-based Analysis (GEE)

| Group     | Category | Trait Label    | Name                                                         | GEE Link                                                                                                                                                            |
|-----------|----------|----------------|--------------------------------------------------------------|---------------------------------------------------------------------------------------------------------------------------------------------------------------------|
| Metabolic | Glycemic | res1f1glu7o    | Age-sex adjusted Fasting Plasma Glucose ex7 offspring        | <a href="http://www.ncbi.nlm.nih.gov/projects/gap/cgi-bin/analysis.cgi?id=pha000424">http://www.ncbi.nlm.nih.gov/projects/gap/cgi-bin/analysis.cgi?id=pha000424</a> |
| Metabolic | Glycemic | res1f1fins5o   | Age-sex adjusted Fasting Insulin ex5 offspring               | <a href="http://www.ncbi.nlm.nih.gov/projects/gap/cgi-bin/analysis.cgi?id=pha000426">http://www.ncbi.nlm.nih.gov/projects/gap/cgi-bin/analysis.cgi?id=pha000426</a> |
| Metabolic | Glycemic | res1f1fins7o   | Age-sex adjusted Fasting Insulin ex7 offspring               | <a href="http://www.ncbi.nlm.nih.gov/projects/gap/cgi-bin/analysis.cgi?id=pha000428">http://www.ncbi.nlm.nih.gov/projects/gap/cgi-bin/analysis.cgi?id=pha000428</a> |
| Metabolic | Glycemic | res1l1gutt5o   | Age-sex adjusted Insulin Sensitivity ex5 offspring           | <a href="http://www.ncbi.nlm.nih.gov/projects/gap/cgi-bin/analysis.cgi?id=pha000430">http://www.ncbi.nlm.nih.gov/projects/gap/cgi-bin/analysis.cgi?id=pha000430</a> |
| Metabolic | Glycemic | res1lhba1c5o   | Age-sex adjusted Fasting HbA1c ex5 offspring                 | <a href="http://www.ncbi.nlm.nih.gov/projects/gap/cgi-bin/analysis.cgi?id=pha000432">http://www.ncbi.nlm.nih.gov/projects/gap/cgi-bin/analysis.cgi?id=pha000432</a> |
| Metabolic | Glycemic | res1lhba1c7o   | Age-sex adjusted HbA1c ex7 offspring                         | <a href="http://www.ncbi.nlm.nih.gov/projects/gap/cgi-bin/analysis.cgi?id=pha000434">http://www.ncbi.nlm.nih.gov/projects/gap/cgi-bin/analysis.cgi?id=pha000434</a> |
| Metabolic | Glycemic | res1lh1r5o     | Age-sex adjusted HOMA-IR ex5 offspring                       | <a href="http://www.ncbi.nlm.nih.gov/projects/gap/cgi-bin/analysis.cgi?id=pha000436">http://www.ncbi.nlm.nih.gov/projects/gap/cgi-bin/analysis.cgi?id=pha000436</a> |
| Metabolic | Glycemic | res1lh1r7o     | Age-sex adjusted HOMA-IR ex7 offspring                       | <a href="http://www.ncbi.nlm.nih.gov/projects/gap/cgi-bin/analysis.cgi?id=pha000438">http://www.ncbi.nlm.nih.gov/projects/gap/cgi-bin/analysis.cgi?id=pha000438</a> |
| Metabolic | Glycemic | res2l1mfglu17o | Age-sex adjusted Mean Plasma Glucose ex1-7 offspring         | <a href="http://www.ncbi.nlm.nih.gov/projects/gap/cgi-bin/analysis.cgi?id=pha000440">http://www.ncbi.nlm.nih.gov/projects/gap/cgi-bin/analysis.cgi?id=pha000440</a> |
| Metabolic | Glycemic | res1l1retn7o   | Age-sex adjusted Resistin ex7 offspring                      | <a href="http://www.ncbi.nlm.nih.gov/projects/gap/cgi-bin/analysis.cgi?id=pha000442">http://www.ncbi.nlm.nih.gov/projects/gap/cgi-bin/analysis.cgi?id=pha000442</a> |
| Metabolic | Glycemic | res2ladipoq7o  | Multivariable adjusted Adiponectin ex7 offspring             | <a href="http://www.ncbi.nlm.nih.gov/projects/gap/cgi-bin/analysis.cgi?id=pha000444">http://www.ncbi.nlm.nih.gov/projects/gap/cgi-bin/analysis.cgi?id=pha000444</a> |
| Metabolic | Glycemic | res2l1f1glu5o  | Multivariable adjusted Fasting Plasma Glucose ex5 offspring  | <a href="http://www.ncbi.nlm.nih.gov/projects/gap/cgi-bin/analysis.cgi?id=pha000446">http://www.ncbi.nlm.nih.gov/projects/gap/cgi-bin/analysis.cgi?id=pha000446</a> |
| Metabolic | Glycemic | res2l1f1glu7o  | Multivariable adjusted Fasting Plasma Glucose ex7 offspring  | <a href="http://www.ncbi.nlm.nih.gov/projects/gap/cgi-bin/analysis.cgi?id=pha000448">http://www.ncbi.nlm.nih.gov/projects/gap/cgi-bin/analysis.cgi?id=pha000448</a> |
| Metabolic | Glycemic | res2l1f1ins5o  | Multivariable adjusted Fasting Insulin ex5 offspring         | <a href="http://www.ncbi.nlm.nih.gov/projects/gap/cgi-bin/analysis.cgi?id=pha000450">http://www.ncbi.nlm.nih.gov/projects/gap/cgi-bin/analysis.cgi?id=pha000450</a> |
| Metabolic | Glycemic | res2l1f1ins7o  | Multivariable adjusted Fasting Insulin ex7 offspring         | <a href="http://www.ncbi.nlm.nih.gov/projects/gap/cgi-bin/analysis.cgi?id=pha000452">http://www.ncbi.nlm.nih.gov/projects/gap/cgi-bin/analysis.cgi?id=pha000452</a> |
| Metabolic | Glycemic | res2l1gutt5o   | Multivariable adjusted Insulin Sensitivity ex5 offspring     | <a href="http://www.ncbi.nlm.nih.gov/projects/gap/cgi-bin/analysis.cgi?id=pha000454">http://www.ncbi.nlm.nih.gov/projects/gap/cgi-bin/analysis.cgi?id=pha000454</a> |
| Metabolic | Glycemic | res2lhba1c5o   | Multivariable adjusted Fasting HbA1c ex5 offspring           | <a href="http://www.ncbi.nlm.nih.gov/projects/gap/cgi-bin/analysis.cgi?id=pha000456">http://www.ncbi.nlm.nih.gov/projects/gap/cgi-bin/analysis.cgi?id=pha000456</a> |
| Metabolic | Glycemic | res2lhba1c7o   | Multivariable adjusted HbA1c ex7 offspring                   | <a href="http://www.ncbi.nlm.nih.gov/projects/gap/cgi-bin/analysis.cgi?id=pha000458">http://www.ncbi.nlm.nih.gov/projects/gap/cgi-bin/analysis.cgi?id=pha000458</a> |
| Metabolic | Glycemic | res2lh1r5o     | Multivariable adjusted HOMA-IR ex5 offspring                 | <a href="http://www.ncbi.nlm.nih.gov/projects/gap/cgi-bin/analysis.cgi?id=pha000460">http://www.ncbi.nlm.nih.gov/projects/gap/cgi-bin/analysis.cgi?id=pha000460</a> |
| Metabolic | Glycemic | res2lh1r7o     | Multivariable adjusted HOMA-IR ex7 offspring                 | <a href="http://www.ncbi.nlm.nih.gov/projects/gap/cgi-bin/analysis.cgi?id=pha000462">http://www.ncbi.nlm.nih.gov/projects/gap/cgi-bin/analysis.cgi?id=pha000462</a> |
| Metabolic | Glycemic | res2l1mfglu17o | Multivariable adjusted Mean Plasma Glucose exam1-7 offspring | <a href="http://www.ncbi.nlm.nih.gov/projects/gap/cgi-bin/analysis.cgi?id=pha000464">http://www.ncbi.nlm.nih.gov/projects/gap/cgi-bin/analysis.cgi?id=pha000464</a> |
| Metabolic | Glycemic | res2l1retn7o   | Multivariable adjusted Resistin ex7 offspring                | <a href="http://www.ncbi.nlm.nih.gov/projects/gap/cgi-bin/analysis.cgi?id=pha000466">http://www.ncbi.nlm.nih.gov/projects/gap/cgi-bin/analysis.cgi?id=pha000466</a> |
| Metabolic | Lipids   | ApoA14a        | Multivariable adj Plasma ApoA1 Level Offsp ex4               | <a href="http://www.ncbi.nlm.nih.gov/projects/gap/cgi-bin/analysis.cgi?id=pha000468">http://www.ncbi.nlm.nih.gov/projects/gap/cgi-bin/analysis.cgi?id=pha000468</a> |
| Metabolic | Lipids   | ApoA14b        | Age-sex adj Plasma ApoA1 Level Offsp ex4                     | <a href="http://www.ncbi.nlm.nih.gov/projects/gap/cgi-bin/analysis.cgi?id=pha000470">http://www.ncbi.nlm.nih.gov/projects/gap/cgi-bin/analysis.cgi?id=pha000470</a> |
| Metabolic | Lipids   | ApoB4a         | Multivariable adj Plasma ApoB Level Offsp ex4                | <a href="http://www.ncbi.nlm.nih.gov/projects/gap/cgi-bin/analysis.cgi?id=pha000472">http://www.ncbi.nlm.nih.gov/projects/gap/cgi-bin/analysis.cgi?id=pha000472</a> |
| Metabolic | Lipids   | ApoB4b         | Age-sex adj Plasma ApoB Level Offsp ex4                      | <a href="http://www.ncbi.nlm.nih.gov/projects/gap/cgi-bin/analysis.cgi?id=pha000474">http://www.ncbi.nlm.nih.gov/projects/gap/cgi-bin/analysis.cgi?id=pha000474</a> |
| Metabolic | Lipids   | ApoC3a         | Multivariable adj Plasma ApoCIII Level Offsp ex5             | <a href="http://www.ncbi.nlm.nih.gov/projects/gap/cgi-bin/analysis.cgi?id=pha000476">http://www.ncbi.nlm.nih.gov/projects/gap/cgi-bin/analysis.cgi?id=pha000476</a> |
| Metabolic | Lipids   | ApoC3b         | Age-sex adj Plasma ApoCIII Level Offsp ex5                   | <a href="http://www.ncbi.nlm.nih.gov/projects/gap/cgi-bin/analysis.cgi?id=pha000478">http://www.ncbi.nlm.nih.gov/projects/gap/cgi-bin/analysis.cgi?id=pha000478</a> |
| Metabolic | Lipids   | chol1a         | Multivariable adj Chol Offsp ex1                             | <a href="http://www.ncbi.nlm.nih.gov/projects/gap/cgi-bin/analysis.cgi?id=pha000480">http://www.ncbi.nlm.nih.gov/projects/gap/cgi-bin/analysis.cgi?id=pha000480</a> |
| Metabolic | Lipids   | chol1b         | Age-sex adj Chol Offsp ex1                                   | <a href="http://www.ncbi.nlm.nih.gov/projects/gap/cgi-bin/analysis.cgi?id=pha000482">http://www.ncbi.nlm.nih.gov/projects/gap/cgi-bin/analysis.cgi?id=pha000482</a> |
| Metabolic | Lipids   | chol2b         | Age-sex adj Chol Offsp ex2                                   | <a href="http://www.ncbi.nlm.nih.gov/projects/gap/cgi-bin/analysis.cgi?id=pha000484">http://www.ncbi.nlm.nih.gov/projects/gap/cgi-bin/analysis.cgi?id=pha000484</a> |
| Metabolic | Lipids   | chol3b         | Age-sex adj Chol Offsp ex3                                   | <a href="http://www.ncbi.nlm.nih.gov/projects/gap/cgi-bin/analysis.cgi?id=pha000486">http://www.ncbi.nlm.nih.gov/projects/gap/cgi-bin/analysis.cgi?id=pha000486</a> |
| Metabolic | Lipids   | chol4b         | Age-sex adj Chol Offsp ex4                                   | <a href="http://www.ncbi.nlm.nih.gov/projects/gap/cgi-bin/analysis.cgi?id=pha000488">http://www.ncbi.nlm.nih.gov/projects/gap/cgi-bin/analysis.cgi?id=pha000488</a> |
| Metabolic | Lipids   | chol5b         | Age-sex adj Chol Offsp ex5                                   | <a href="http://www.ncbi.nlm.nih.gov/projects/gap/cgi-bin/analysis.cgi?id=pha000490">http://www.ncbi.nlm.nih.gov/projects/gap/cgi-bin/analysis.cgi?id=pha000490</a> |
| Metabolic | Lipids   | chol6b         | Age-sex adj Chol Offsp ex6                                   | <a href="http://www.ncbi.nlm.nih.gov/projects/gap/cgi-bin/analysis.cgi?id=pha000492">http://www.ncbi.nlm.nih.gov/projects/gap/cgi-bin/analysis.cgi?id=pha000492</a> |
| Metabolic | Lipids   | chol7b         | Age-sex adj Chol Offsp ex7                                   | <a href="http://www.ncbi.nlm.nih.gov/projects/gap/cgi-bin/analysis.cgi?id=pha000494">http://www.ncbi.nlm.nih.gov/projects/gap/cgi-bin/analysis.cgi?id=pha000494</a> |
| Metabolic | Lipids   | cholhdl1a      | Multivariable adj Chol-HDL Ratio Offsp ex1                   | <a href="http://www.ncbi.nlm.nih.gov/projects/gap/cgi-bin/analysis.cgi?id=pha000496">http://www.ncbi.nlm.nih.gov/projects/gap/cgi-bin/analysis.cgi?id=pha000496</a> |
| Metabolic | Lipids   | cholhdl1b      | Age-sex adj Chol-HDL Ratio Offsp ex1                         | <a href="http://www.ncbi.nlm.nih.gov/projects/gap/cgi-bin/analysis.cgi?id=pha000498">http://www.ncbi.nlm.nih.gov/projects/gap/cgi-bin/analysis.cgi?id=pha000498</a> |
| Metabolic | Lipids   | cholhdl2b      | Age-sex adj Chol-HDL Ratio Offsp ex2                         | <a href="http://www.ncbi.nlm.nih.gov/projects/gap/cgi-bin/analysis.cgi?id=pha000500">http://www.ncbi.nlm.nih.gov/projects/gap/cgi-bin/analysis.cgi?id=pha000500</a> |
| Metabolic | Lipids   | cholhdl3b      | Age-sex adj Chol-HDL Ratio Offsp ex3                         | <a href="http://www.ncbi.nlm.nih.gov/projects/gap/cgi-bin/analysis.cgi?id=pha000502">http://www.ncbi.nlm.nih.gov/projects/gap/cgi-bin/analysis.cgi?id=pha000502</a> |
| Metabolic | Lipids   | cholhdl4b      | Age-sex adj Chol-HDL Ratio Offsp ex4                         | <a href="http://www.ncbi.nlm.nih.gov/projects/gap/cgi-bin/analysis.cgi?id=pha000504">http://www.ncbi.nlm.nih.gov/projects/gap/cgi-bin/analysis.cgi?id=pha000504</a> |
| Metabolic | Lipids   | cholhdl5b      | Age-sex adj Chol-HDL Ratio Offsp ex5                         | <a href="http://www.ncbi.nlm.nih.gov/projects/gap/cgi-bin/analysis.cgi?id=pha000506">http://www.ncbi.nlm.nih.gov/projects/gap/cgi-bin/analysis.cgi?id=pha000506</a> |
| Metabolic | Lipids   | cholhdl6b      | Age-sex adj Chol-HDL Ratio Offsp ex6                         | <a href="http://www.ncbi.nlm.nih.gov/projects/gap/cgi-bin/analysis.cgi?id=pha000508">http://www.ncbi.nlm.nih.gov/projects/gap/cgi-bin/analysis.cgi?id=pha000508</a> |
| Metabolic | Lipids   | cholhdl7b      | Age-sex adj Chol-HDL Ratio Offsp ex7                         | <a href="http://www.ncbi.nlm.nih.gov/projects/gap/cgi-bin/analysis.cgi?id=pha000510">http://www.ncbi.nlm.nih.gov/projects/gap/cgi-bin/analysis.cgi?id=pha000510</a> |
| Metabolic | Lipids   | hdl1a          | Multivariable adj HDL Offsp ex1                              | <a href="http://www.ncbi.nlm.nih.gov/projects/gap/cgi-bin/analysis.cgi?id=pha000512">http://www.ncbi.nlm.nih.gov/projects/gap/cgi-bin/analysis.cgi?id=pha000512</a> |
| Metabolic | Lipids   | hdl1b          | Age-sex adj HDL Offsp ex1                                    | <a href="http://www.ncbi.nlm.nih.gov/projects/gap/cgi-bin/analysis.cgi?id=pha000514">http://www.ncbi.nlm.nih.gov/projects/gap/cgi-bin/analysis.cgi?id=pha000514</a> |
| Metabolic | Lipids   | hdl24a         | Multivariable adj HDL2 Offsp ex4                             | <a href="http://www.ncbi.nlm.nih.gov/projects/gap/cgi-bin/analysis.cgi?id=pha000516">http://www.ncbi.nlm.nih.gov/projects/gap/cgi-bin/analysis.cgi?id=pha000516</a> |
| Metabolic | Lipids   | hdl24b         | Age-sex adj HDL2 Offsp ex4                                   | <a href="http://www.ncbi.nlm.nih.gov/projects/gap/cgi-bin/analysis.cgi?id=pha000518">http://www.ncbi.nlm.nih.gov/projects/gap/cgi-bin/analysis.cgi?id=pha000518</a> |
| Metabolic | Lipids   | hdl25a         | Multivariable adj HDL2 Offsp ex5                             | <a href="http://www.ncbi.nlm.nih.gov/projects/gap/cgi-bin/analysis.cgi?id=pha000520">http://www.ncbi.nlm.nih.gov/projects/gap/cgi-bin/analysis.cgi?id=pha000520</a> |
| Metabolic | Lipids   | hdl25b         | Age-sex adj HDL2 Offsp ex5                                   | <a href="http://www.ncbi.nlm.nih.gov/projects/gap/cgi-bin/analysis.cgi?id=pha000522">http://www.ncbi.nlm.nih.gov/projects/gap/cgi-bin/analysis.cgi?id=pha000522</a> |
| Metabolic | Lipids   | hdl2b          | Age-sex adj HDL Offsp ex2                                    | <a href="http://www.ncbi.nlm.nih.gov/projects/gap/cgi-bin/analysis.cgi?id=pha000524">http://www.ncbi.nlm.nih.gov/projects/gap/cgi-bin/analysis.cgi?id=pha000524</a> |
| Metabolic | Lipids   | hdl34a         | Multivariable adj HDL3 Offsp ex4                             | <a href="http://www.ncbi.nlm.nih.gov/projects/gap/cgi-bin/analysis.cgi?id=pha000526">http://www.ncbi.nlm.nih.gov/projects/gap/cgi-bin/analysis.cgi?id=pha000526</a> |
| Metabolic | Lipids   | hdl34b         | Age-sex adj HDL3 Offsp ex4                                   | <a href="http://www.ncbi.nlm.nih.gov/projects/gap/cgi-bin/analysis.cgi?id=pha000528">http://www.ncbi.nlm.nih.gov/projects/gap/cgi-bin/analysis.cgi?id=pha000528</a> |
| Metabolic | Lipids   | hdl35a         | Multivariable adj HDL3 Offsp ex5                             | <a href="http://www.ncbi.nlm.nih.gov/projects/gap/cgi-bin/analysis.cgi?id=pha000530">http://www.ncbi.nlm.nih.gov/projects/gap/cgi-bin/analysis.cgi?id=pha000530</a> |
| Metabolic | Lipids   | hdl35b         | Age-sex adj HDL3 Offsp ex5                                   | <a href="http://www.ncbi.nlm.nih.gov/projects/gap/cgi-bin/analysis.cgi?id=pha000532">http://www.ncbi.nlm.nih.gov/projects/gap/cgi-bin/analysis.cgi?id=pha000532</a> |

Online Table 1: Phenotypes Evaluated for Association using Population-based Analysis (GEE)

| Group     | Category | Trait Label | Name                                                 | GEE Link                                                                                                                                                            |
|-----------|----------|-------------|------------------------------------------------------|---------------------------------------------------------------------------------------------------------------------------------------------------------------------|
| Metabolic | Lipids   | hdl3b       | Age-sex adj HDL Offsp ex3                            | <a href="http://www.ncbi.nlm.nih.gov/projects/gap/cgi-bin/analysis.cgi?id=pha000534">http://www.ncbi.nlm.nih.gov/projects/gap/cgi-bin/analysis.cgi?id=pha000534</a> |
| Metabolic | Lipids   | hdl4b       | Age-sex adj HDL Offsp ex4                            | <a href="http://www.ncbi.nlm.nih.gov/projects/gap/cgi-bin/analysis.cgi?id=pha000536">http://www.ncbi.nlm.nih.gov/projects/gap/cgi-bin/analysis.cgi?id=pha000536</a> |
| Metabolic | Lipids   | hdl5b       | Age-sex adj HDL Offsp ex5                            | <a href="http://www.ncbi.nlm.nih.gov/projects/gap/cgi-bin/analysis.cgi?id=pha000538">http://www.ncbi.nlm.nih.gov/projects/gap/cgi-bin/analysis.cgi?id=pha000538</a> |
| Metabolic | Lipids   | hdl6b       | Age-sex adj HDL Offsp ex6                            | <a href="http://www.ncbi.nlm.nih.gov/projects/gap/cgi-bin/analysis.cgi?id=pha000540">http://www.ncbi.nlm.nih.gov/projects/gap/cgi-bin/analysis.cgi?id=pha000540</a> |
| Metabolic | Lipids   | hdl7b       | Age-sex adj HDL Offsp ex7                            | <a href="http://www.ncbi.nlm.nih.gov/projects/gap/cgi-bin/analysis.cgi?id=pha000542">http://www.ncbi.nlm.nih.gov/projects/gap/cgi-bin/analysis.cgi?id=pha000542</a> |
| Metabolic | Lipids   | HDLNMRint4a | Multivariable adj NMR HDL Int Offsp ex4 or TG > 400  | <a href="http://www.ncbi.nlm.nih.gov/projects/gap/cgi-bin/analysis.cgi?id=pha000544">http://www.ncbi.nlm.nih.gov/projects/gap/cgi-bin/analysis.cgi?id=pha000544</a> |
| Metabolic | Lipids   | HDLNMRint4b | Age-sex adj NMR HDL Int Offsp ex4 or TG > 400        | <a href="http://www.ncbi.nlm.nih.gov/projects/gap/cgi-bin/analysis.cgi?id=pha000546">http://www.ncbi.nlm.nih.gov/projects/gap/cgi-bin/analysis.cgi?id=pha000546</a> |
| Metabolic | Lipids   | HDLNMRlg4a  | Multivariable adj NMR HDL Lg Offsp ex4 or TG > 400   | <a href="http://www.ncbi.nlm.nih.gov/projects/gap/cgi-bin/analysis.cgi?id=pha000548">http://www.ncbi.nlm.nih.gov/projects/gap/cgi-bin/analysis.cgi?id=pha000548</a> |
| Metabolic | Lipids   | HDLNMRlg4b  | Age-sex adj NMR HDL Lg Offsp ex4 or TG > 400         | <a href="http://www.ncbi.nlm.nih.gov/projects/gap/cgi-bin/analysis.cgi?id=pha000550">http://www.ncbi.nlm.nih.gov/projects/gap/cgi-bin/analysis.cgi?id=pha000550</a> |
| Metabolic | Lipids   | HDLNMRsm4a  | Multivariable adj NMR HDL Sm Offsp ex4 or TG > 400   | <a href="http://www.ncbi.nlm.nih.gov/projects/gap/cgi-bin/analysis.cgi?id=pha000552">http://www.ncbi.nlm.nih.gov/projects/gap/cgi-bin/analysis.cgi?id=pha000552</a> |
| Metabolic | Lipids   | HDLNMRsm4b  | Age-sex adj NMR HDL Sm Offsp ex4 or TG > 400         | <a href="http://www.ncbi.nlm.nih.gov/projects/gap/cgi-bin/analysis.cgi?id=pha000554">http://www.ncbi.nlm.nih.gov/projects/gap/cgi-bin/analysis.cgi?id=pha000554</a> |
| Metabolic | Lipids   | HDLNMRsz4a  | Multivariable adj NMR HDL Size Offsp ex4 or TG > 400 | <a href="http://www.ncbi.nlm.nih.gov/projects/gap/cgi-bin/analysis.cgi?id=pha000556">http://www.ncbi.nlm.nih.gov/projects/gap/cgi-bin/analysis.cgi?id=pha000556</a> |
| Metabolic | Lipids   | HDLNMRsz4b  | Age-sex adj NMR HDL Size Offsp ex4 or TG > 400       | <a href="http://www.ncbi.nlm.nih.gov/projects/gap/cgi-bin/analysis.cgi?id=pha000558">http://www.ncbi.nlm.nih.gov/projects/gap/cgi-bin/analysis.cgi?id=pha000558</a> |
| Metabolic | Lipids   | IDLNMR4a    | Multivariable adj NMR IDL Offsp ex4 or TG > 400      | <a href="http://www.ncbi.nlm.nih.gov/projects/gap/cgi-bin/analysis.cgi?id=pha000560">http://www.ncbi.nlm.nih.gov/projects/gap/cgi-bin/analysis.cgi?id=pha000560</a> |
| Metabolic | Lipids   | IDLNMR4b    | Age-sex adj NMR IDL Offsp ex4 or TG > 400            | <a href="http://www.ncbi.nlm.nih.gov/projects/gap/cgi-bin/analysis.cgi?id=pha000562">http://www.ncbi.nlm.nih.gov/projects/gap/cgi-bin/analysis.cgi?id=pha000562</a> |
| Metabolic | Lipids   | ldl1a       | Multivariable adj LDL Offsp ex1                      | <a href="http://www.ncbi.nlm.nih.gov/projects/gap/cgi-bin/analysis.cgi?id=pha000564">http://www.ncbi.nlm.nih.gov/projects/gap/cgi-bin/analysis.cgi?id=pha000564</a> |
| Metabolic | Lipids   | ldl1b       | Age-sex adj LDL Offsp ex1                            | <a href="http://www.ncbi.nlm.nih.gov/projects/gap/cgi-bin/analysis.cgi?id=pha000566">http://www.ncbi.nlm.nih.gov/projects/gap/cgi-bin/analysis.cgi?id=pha000566</a> |
| Metabolic | Lipids   | ldl2b       | Age-sex adj LDL Offsp ex2                            | <a href="http://www.ncbi.nlm.nih.gov/projects/gap/cgi-bin/analysis.cgi?id=pha000568">http://www.ncbi.nlm.nih.gov/projects/gap/cgi-bin/analysis.cgi?id=pha000568</a> |
| Metabolic | Lipids   | ldl3b       | Age-sex adj LDL Offsp ex3                            | <a href="http://www.ncbi.nlm.nih.gov/projects/gap/cgi-bin/analysis.cgi?id=pha000570">http://www.ncbi.nlm.nih.gov/projects/gap/cgi-bin/analysis.cgi?id=pha000570</a> |
| Metabolic | Lipids   | ldl4b       | Age-sex adj LDL Offsp ex4                            | <a href="http://www.ncbi.nlm.nih.gov/projects/gap/cgi-bin/analysis.cgi?id=pha000572">http://www.ncbi.nlm.nih.gov/projects/gap/cgi-bin/analysis.cgi?id=pha000572</a> |
| Metabolic | Lipids   | ldl5b       | Age-sex adj LDL Offsp ex5                            | <a href="http://www.ncbi.nlm.nih.gov/projects/gap/cgi-bin/analysis.cgi?id=pha000574">http://www.ncbi.nlm.nih.gov/projects/gap/cgi-bin/analysis.cgi?id=pha000574</a> |
| Metabolic | Lipids   | ldl6b       | Age-sex adj LDL Offsp ex6                            | <a href="http://www.ncbi.nlm.nih.gov/projects/gap/cgi-bin/analysis.cgi?id=pha000576">http://www.ncbi.nlm.nih.gov/projects/gap/cgi-bin/analysis.cgi?id=pha000576</a> |
| Metabolic | Lipids   | ldl7b       | Age-sex adj LDL Offsp ex7                            | <a href="http://www.ncbi.nlm.nih.gov/projects/gap/cgi-bin/analysis.cgi?id=pha000578">http://www.ncbi.nlm.nih.gov/projects/gap/cgi-bin/analysis.cgi?id=pha000578</a> |
| Metabolic | Lipids   | LDLNMRlg4a  | Multivariable adj NMR LDL Lg Offsp ex4 or TG > 400   | <a href="http://www.ncbi.nlm.nih.gov/projects/gap/cgi-bin/analysis.cgi?id=pha000580">http://www.ncbi.nlm.nih.gov/projects/gap/cgi-bin/analysis.cgi?id=pha000580</a> |
| Metabolic | Lipids   | LDLNMRlg4b  | Age-sex adj NMR LDL Lg Offsp ex4 or TG > 400         | <a href="http://www.ncbi.nlm.nih.gov/projects/gap/cgi-bin/analysis.cgi?id=pha000582">http://www.ncbi.nlm.nih.gov/projects/gap/cgi-bin/analysis.cgi?id=pha000582</a> |
| Metabolic | Lipids   | LDLNMRsm4a  | Multivariable adj NMR LDL Sm Offsp ex4 or TG > 400   | <a href="http://www.ncbi.nlm.nih.gov/projects/gap/cgi-bin/analysis.cgi?id=pha000584">http://www.ncbi.nlm.nih.gov/projects/gap/cgi-bin/analysis.cgi?id=pha000584</a> |
| Metabolic | Lipids   | LDLNMRsm4b  | Age-sex adj NMR LDL Sm Offsp ex4 or TG > 400         | <a href="http://www.ncbi.nlm.nih.gov/projects/gap/cgi-bin/analysis.cgi?id=pha000586">http://www.ncbi.nlm.nih.gov/projects/gap/cgi-bin/analysis.cgi?id=pha000586</a> |
| Metabolic | Lipids   | LDLNMRsz4a  | Multivariable adj NMR LDL Size Offsp ex4 or TG > 400 | <a href="http://www.ncbi.nlm.nih.gov/projects/gap/cgi-bin/analysis.cgi?id=pha000588">http://www.ncbi.nlm.nih.gov/projects/gap/cgi-bin/analysis.cgi?id=pha000588</a> |
| Metabolic | Lipids   | LDLNMRsz4b  | Age-sex adj NMR LDL Size Offsp ex4 or TG > 400       | <a href="http://www.ncbi.nlm.nih.gov/projects/gap/cgi-bin/analysis.cgi?id=pha000590">http://www.ncbi.nlm.nih.gov/projects/gap/cgi-bin/analysis.cgi?id=pha000590</a> |
| Metabolic | Lipids   | lpa3a       | Multivariable adj Lpa Offsp ex3                      | <a href="http://www.ncbi.nlm.nih.gov/projects/gap/cgi-bin/analysis.cgi?id=pha000592">http://www.ncbi.nlm.nih.gov/projects/gap/cgi-bin/analysis.cgi?id=pha000592</a> |
| Metabolic | Lipids   | lpa3b       | Age-sex adj Lpa Offsp ex3                            | <a href="http://www.ncbi.nlm.nih.gov/projects/gap/cgi-bin/analysis.cgi?id=pha000594">http://www.ncbi.nlm.nih.gov/projects/gap/cgi-bin/analysis.cgi?id=pha000594</a> |
| Metabolic | Lipids   | meanchola   | Multivariable adj NMR Chol Offsp ex1-7               | <a href="http://www.ncbi.nlm.nih.gov/projects/gap/cgi-bin/analysis.cgi?id=pha000596">http://www.ncbi.nlm.nih.gov/projects/gap/cgi-bin/analysis.cgi?id=pha000596</a> |
| Metabolic | Lipids   | meancholb   | Age-sex adj NMR Chol Offsp ex1-7                     | <a href="http://www.ncbi.nlm.nih.gov/projects/gap/cgi-bin/analysis.cgi?id=pha000598">http://www.ncbi.nlm.nih.gov/projects/gap/cgi-bin/analysis.cgi?id=pha000598</a> |
| Metabolic | Lipids   | meanhdla    | Multivariable adj NMR HDL Offsp ex1-7                | <a href="http://www.ncbi.nlm.nih.gov/projects/gap/cgi-bin/analysis.cgi?id=pha000600">http://www.ncbi.nlm.nih.gov/projects/gap/cgi-bin/analysis.cgi?id=pha000600</a> |
| Metabolic | Lipids   | meanhdlb    | Age-sex adj NMR HDL Offsp ex1-7                      | <a href="http://www.ncbi.nlm.nih.gov/projects/gap/cgi-bin/analysis.cgi?id=pha000602">http://www.ncbi.nlm.nih.gov/projects/gap/cgi-bin/analysis.cgi?id=pha000602</a> |
| Metabolic | Lipids   | meanldla    | Multivariable adj NMR Calc LDL Offsp ex1-7           | <a href="http://www.ncbi.nlm.nih.gov/projects/gap/cgi-bin/analysis.cgi?id=pha000604">http://www.ncbi.nlm.nih.gov/projects/gap/cgi-bin/analysis.cgi?id=pha000604</a> |
| Metabolic | Lipids   | meanldlb    | Age-sex adj NMR Calc LDL Offsp ex1-7                 | <a href="http://www.ncbi.nlm.nih.gov/projects/gap/cgi-bin/analysis.cgi?id=pha000606">http://www.ncbi.nlm.nih.gov/projects/gap/cgi-bin/analysis.cgi?id=pha000606</a> |
| Metabolic | Lipids   | meantga     | Multivariable adj NMR (TG) Offsp ex1-7               | <a href="http://www.ncbi.nlm.nih.gov/projects/gap/cgi-bin/analysis.cgi?id=pha000608">http://www.ncbi.nlm.nih.gov/projects/gap/cgi-bin/analysis.cgi?id=pha000608</a> |
| Metabolic | Lipids   | meantgb     | Age-sex adj NMR (TG) Offsp ex1-7                     | <a href="http://www.ncbi.nlm.nih.gov/projects/gap/cgi-bin/analysis.cgi?id=pha000610">http://www.ncbi.nlm.nih.gov/projects/gap/cgi-bin/analysis.cgi?id=pha000610</a> |
| Metabolic | Lipids   | PlasmaApoEa | Multivariable adj Plasma ApoE Level Offsp ex5        | <a href="http://www.ncbi.nlm.nih.gov/projects/gap/cgi-bin/analysis.cgi?id=pha000612">http://www.ncbi.nlm.nih.gov/projects/gap/cgi-bin/analysis.cgi?id=pha000612</a> |
| Metabolic | Lipids   | PlasmaApoEb | Age-sex adj Plasma ApoE Level Offsp ex5              | <a href="http://www.ncbi.nlm.nih.gov/projects/gap/cgi-bin/analysis.cgi?id=pha000614">http://www.ncbi.nlm.nih.gov/projects/gap/cgi-bin/analysis.cgi?id=pha000614</a> |
| Metabolic | Lipids   | RLPChol4a   | Multivariable adj Remnant LP Chol Offsp ex4          | <a href="http://www.ncbi.nlm.nih.gov/projects/gap/cgi-bin/analysis.cgi?id=pha000924">http://www.ncbi.nlm.nih.gov/projects/gap/cgi-bin/analysis.cgi?id=pha000924</a> |
| Metabolic | Lipids   | RLPChol4b   | Age-sex adj Remnant LP Chol Offsp ex4                | <a href="http://www.ncbi.nlm.nih.gov/projects/gap/cgi-bin/analysis.cgi?id=pha000926">http://www.ncbi.nlm.nih.gov/projects/gap/cgi-bin/analysis.cgi?id=pha000926</a> |
| Metabolic | Lipids   | RLPTG4a     | Remnant LP TG Offsp ex4                              | <a href="http://www.ncbi.nlm.nih.gov/projects/gap/cgi-bin/analysis.cgi?id=pha000618">http://www.ncbi.nlm.nih.gov/projects/gap/cgi-bin/analysis.cgi?id=pha000618</a> |
| Metabolic | Lipids   | RLPTG4b     | Remnant LP Age-sex adj TG Offsp ex4                  | <a href="http://www.ncbi.nlm.nih.gov/projects/gap/cgi-bin/analysis.cgi?id=pha000616">http://www.ncbi.nlm.nih.gov/projects/gap/cgi-bin/analysis.cgi?id=pha000616</a> |
| Metabolic | Lipids   | tg1a        | Multivariable adj TG Offsp ex1                       | <a href="http://www.ncbi.nlm.nih.gov/projects/gap/cgi-bin/analysis.cgi?id=pha000620">http://www.ncbi.nlm.nih.gov/projects/gap/cgi-bin/analysis.cgi?id=pha000620</a> |
| Metabolic | Lipids   | tg1b        | Age-sex adj TG Offsp ex1                             | <a href="http://www.ncbi.nlm.nih.gov/projects/gap/cgi-bin/analysis.cgi?id=pha000622">http://www.ncbi.nlm.nih.gov/projects/gap/cgi-bin/analysis.cgi?id=pha000622</a> |
| Metabolic | Lipids   | tg2b        | Age-sex adj TG Offsp ex2                             | <a href="http://www.ncbi.nlm.nih.gov/projects/gap/cgi-bin/analysis.cgi?id=pha000624">http://www.ncbi.nlm.nih.gov/projects/gap/cgi-bin/analysis.cgi?id=pha000624</a> |
| Metabolic | Lipids   | tg3b        | Age-sex adj TG Offsp ex3                             | <a href="http://www.ncbi.nlm.nih.gov/projects/gap/cgi-bin/analysis.cgi?id=pha000626">http://www.ncbi.nlm.nih.gov/projects/gap/cgi-bin/analysis.cgi?id=pha000626</a> |
| Metabolic | Lipids   | tg4b        | Age-sex adj TG Offsp ex4                             | <a href="http://www.ncbi.nlm.nih.gov/projects/gap/cgi-bin/analysis.cgi?id=pha000628">http://www.ncbi.nlm.nih.gov/projects/gap/cgi-bin/analysis.cgi?id=pha000628</a> |
| Metabolic | Lipids   | tg5b        | Age-sex adj TG Offsp ex5                             | <a href="http://www.ncbi.nlm.nih.gov/projects/gap/cgi-bin/analysis.cgi?id=pha000630">http://www.ncbi.nlm.nih.gov/projects/gap/cgi-bin/analysis.cgi?id=pha000630</a> |
| Metabolic | Lipids   | tg6b        | Age-sex adj TG Offsp ex6                             | <a href="http://www.ncbi.nlm.nih.gov/projects/gap/cgi-bin/analysis.cgi?id=pha000632">http://www.ncbi.nlm.nih.gov/projects/gap/cgi-bin/analysis.cgi?id=pha000632</a> |
| Metabolic | Lipids   | tg7b        | Age-sex adj TG Offsp ex7                             | <a href="http://www.ncbi.nlm.nih.gov/projects/gap/cgi-bin/analysis.cgi?id=pha000634">http://www.ncbi.nlm.nih.gov/projects/gap/cgi-bin/analysis.cgi?id=pha000634</a> |
| Metabolic | Lipids   | tghdl1a     | Multivariable adj TG-HDL Ratio Offsp ex1             | <a href="http://www.ncbi.nlm.nih.gov/projects/gap/cgi-bin/analysis.cgi?id=pha000668">http://www.ncbi.nlm.nih.gov/projects/gap/cgi-bin/analysis.cgi?id=pha000668</a> |
| Metabolic | Lipids   | tghdl1b     | Age-sex adj TG-HDL Ratio Offsp ex1                   | <a href="http://www.ncbi.nlm.nih.gov/projects/gap/cgi-bin/analysis.cgi?id=pha000914">http://www.ncbi.nlm.nih.gov/projects/gap/cgi-bin/analysis.cgi?id=pha000914</a> |

Online Table 1: Phenotypes Evaluated for Association using Population-based Analysis (GEE)

| Group     | Category  | Trait Label    | Name                                              | GEE Link                                                                                                                                                            |
|-----------|-----------|----------------|---------------------------------------------------|---------------------------------------------------------------------------------------------------------------------------------------------------------------------|
| Metabolic | Lipids    | tghdl2b        | Age-sex adj TG-HDL Ratio Offsp ex2                | <a href="http://www.ncbi.nlm.nih.gov/projects/gap/cgi-bin/analysis.cgi?id=pha000670">http://www.ncbi.nlm.nih.gov/projects/gap/cgi-bin/analysis.cgi?id=pha000670</a> |
| Metabolic | Lipids    | tghdl3b        | Age-sex adj TG-HDL Ratio Offsp ex3                | <a href="http://www.ncbi.nlm.nih.gov/projects/gap/cgi-bin/analysis.cgi?id=pha000672">http://www.ncbi.nlm.nih.gov/projects/gap/cgi-bin/analysis.cgi?id=pha000672</a> |
| Metabolic | Lipids    | tghdl4b        | Age-sex adj TG-HDL Ratio Offsp ex4                | <a href="http://www.ncbi.nlm.nih.gov/projects/gap/cgi-bin/analysis.cgi?id=pha000674">http://www.ncbi.nlm.nih.gov/projects/gap/cgi-bin/analysis.cgi?id=pha000674</a> |
| Metabolic | Lipids    | tghdl5b        | Age-sex adj TG-HDL Ratio Offsp ex5                | <a href="http://www.ncbi.nlm.nih.gov/projects/gap/cgi-bin/analysis.cgi?id=pha000676">http://www.ncbi.nlm.nih.gov/projects/gap/cgi-bin/analysis.cgi?id=pha000676</a> |
| Metabolic | Lipids    | tghdl6b        | Age-sex adj TG-HDL Ratio Offsp ex6                | <a href="http://www.ncbi.nlm.nih.gov/projects/gap/cgi-bin/analysis.cgi?id=pha000678">http://www.ncbi.nlm.nih.gov/projects/gap/cgi-bin/analysis.cgi?id=pha000678</a> |
| Metabolic | Lipids    | tghdl7b        | Age-sex adj TG-HDL Ratio Offsp ex7                | <a href="http://www.ncbi.nlm.nih.gov/projects/gap/cgi-bin/analysis.cgi?id=pha000680">http://www.ncbi.nlm.nih.gov/projects/gap/cgi-bin/analysis.cgi?id=pha000680</a> |
| Metabolic | Lipids    | VLDLNMRI4a     | Multivariable adj NMR VLDL Int Offsp ex4          | <a href="http://www.ncbi.nlm.nih.gov/projects/gap/cgi-bin/analysis.cgi?id=pha000866">http://www.ncbi.nlm.nih.gov/projects/gap/cgi-bin/analysis.cgi?id=pha000866</a> |
| Metabolic | Lipids    | VLDLNMRI4b     | Age-sex adj NMR VLDL Int Offsp ex4                | <a href="http://www.ncbi.nlm.nih.gov/projects/gap/cgi-bin/analysis.cgi?id=pha000868">http://www.ncbi.nlm.nih.gov/projects/gap/cgi-bin/analysis.cgi?id=pha000868</a> |
| Metabolic | Lipids    | VLDLNMRIg4a    | Multivariable adj NMR VLDL Lg Offsp ex4           | <a href="http://www.ncbi.nlm.nih.gov/projects/gap/cgi-bin/analysis.cgi?id=pha000878">http://www.ncbi.nlm.nih.gov/projects/gap/cgi-bin/analysis.cgi?id=pha000878</a> |
| Metabolic | Lipids    | VLDLNMRIg4b    | Age-sex adj NMR VLDL Lg Offsp ex4                 | <a href="http://www.ncbi.nlm.nih.gov/projects/gap/cgi-bin/analysis.cgi?id=pha000880">http://www.ncbi.nlm.nih.gov/projects/gap/cgi-bin/analysis.cgi?id=pha000880</a> |
| Metabolic | Lipids    | VLDLNMRSm4a    | Multivariable adj NMR VLDL Sm Offsp ex4           | <a href="http://www.ncbi.nlm.nih.gov/projects/gap/cgi-bin/analysis.cgi?id=pha000902">http://www.ncbi.nlm.nih.gov/projects/gap/cgi-bin/analysis.cgi?id=pha000902</a> |
| Metabolic | Lipids    | VLDLNMRSm4b    | Age-sex adj NMR VLDL Sm Offsp ex4                 | <a href="http://www.ncbi.nlm.nih.gov/projects/gap/cgi-bin/analysis.cgi?id=pha000904">http://www.ncbi.nlm.nih.gov/projects/gap/cgi-bin/analysis.cgi?id=pha000904</a> |
| Metabolic | Lipids    | VLDLNMRSz4a    | Multivariable adj NMR VLDL Size Offsp ex4         | <a href="http://www.ncbi.nlm.nih.gov/projects/gap/cgi-bin/analysis.cgi?id=pha000890">http://www.ncbi.nlm.nih.gov/projects/gap/cgi-bin/analysis.cgi?id=pha000890</a> |
| Metabolic | Lipids    | VLDLNMRSz4b    | Age-sex adj NMR VLDL Size Offsp ex4               | <a href="http://www.ncbi.nlm.nih.gov/projects/gap/cgi-bin/analysis.cgi?id=pha000892">http://www.ncbi.nlm.nih.gov/projects/gap/cgi-bin/analysis.cgi?id=pha000892</a> |
| Metabolic | Lipidsmen | menApoB4a      | Multivariable adj Plasma ApoB Level Offsp men ex4 | <a href="http://www.ncbi.nlm.nih.gov/projects/gap/cgi-bin/analysis.cgi?id=pha000916">http://www.ncbi.nlm.nih.gov/projects/gap/cgi-bin/analysis.cgi?id=pha000916</a> |
| Metabolic | Lipidsmen | menApoB4b      | Age-sex adj Plasma ApoB Level Offsp men ex4       | <a href="http://www.ncbi.nlm.nih.gov/projects/gap/cgi-bin/analysis.cgi?id=pha000918">http://www.ncbi.nlm.nih.gov/projects/gap/cgi-bin/analysis.cgi?id=pha000918</a> |
| Metabolic | Lipidsmen | menchol1a      | Multivariable adj Chol Offsp men ex1              | <a href="http://www.ncbi.nlm.nih.gov/projects/gap/cgi-bin/analysis.cgi?id=pha000710">http://www.ncbi.nlm.nih.gov/projects/gap/cgi-bin/analysis.cgi?id=pha000710</a> |
| Metabolic | Lipidsmen | menchol1b      | Age-sex adj Chol Offsp men ex1                    | <a href="http://www.ncbi.nlm.nih.gov/projects/gap/cgi-bin/analysis.cgi?id=pha000712">http://www.ncbi.nlm.nih.gov/projects/gap/cgi-bin/analysis.cgi?id=pha000712</a> |
| Metabolic | Lipidsmen | menchol2b      | Age-sex adj Chol Offsp men ex2                    | <a href="http://www.ncbi.nlm.nih.gov/projects/gap/cgi-bin/analysis.cgi?id=pha000714">http://www.ncbi.nlm.nih.gov/projects/gap/cgi-bin/analysis.cgi?id=pha000714</a> |
| Metabolic | Lipidsmen | menchol3b      | Age-sex adj Chol Offsp men ex3                    | <a href="http://www.ncbi.nlm.nih.gov/projects/gap/cgi-bin/analysis.cgi?id=pha000716">http://www.ncbi.nlm.nih.gov/projects/gap/cgi-bin/analysis.cgi?id=pha000716</a> |
| Metabolic | Lipidsmen | menchol4b      | Age-sex adj Chol Offsp men ex4                    | <a href="http://www.ncbi.nlm.nih.gov/projects/gap/cgi-bin/analysis.cgi?id=pha000718">http://www.ncbi.nlm.nih.gov/projects/gap/cgi-bin/analysis.cgi?id=pha000718</a> |
| Metabolic | Lipidsmen | menchol5b      | Age-sex adj Chol Offsp men ex5                    | <a href="http://www.ncbi.nlm.nih.gov/projects/gap/cgi-bin/analysis.cgi?id=pha000720">http://www.ncbi.nlm.nih.gov/projects/gap/cgi-bin/analysis.cgi?id=pha000720</a> |
| Metabolic | Lipidsmen | menchol6b      | Age-sex adj Chol Offsp men ex6                    | <a href="http://www.ncbi.nlm.nih.gov/projects/gap/cgi-bin/analysis.cgi?id=pha000722">http://www.ncbi.nlm.nih.gov/projects/gap/cgi-bin/analysis.cgi?id=pha000722</a> |
| Metabolic | Lipidsmen | menchol7b      | Age-sex adj Chol Offsp men ex7                    | <a href="http://www.ncbi.nlm.nih.gov/projects/gap/cgi-bin/analysis.cgi?id=pha000724">http://www.ncbi.nlm.nih.gov/projects/gap/cgi-bin/analysis.cgi?id=pha000724</a> |
| Metabolic | Lipidsmen | menhdl1a       | Multivariable adj HDL Offsp men ex1               | <a href="http://www.ncbi.nlm.nih.gov/projects/gap/cgi-bin/analysis.cgi?id=pha000742">http://www.ncbi.nlm.nih.gov/projects/gap/cgi-bin/analysis.cgi?id=pha000742</a> |
| Metabolic | Lipidsmen | menhdl1b       | Age-sex adj HDL Offsp men ex1                     | <a href="http://www.ncbi.nlm.nih.gov/projects/gap/cgi-bin/analysis.cgi?id=pha000744">http://www.ncbi.nlm.nih.gov/projects/gap/cgi-bin/analysis.cgi?id=pha000744</a> |
| Metabolic | Lipidsmen | menhdl2b       | Age-sex adj HDL Offsp men ex2                     | <a href="http://www.ncbi.nlm.nih.gov/projects/gap/cgi-bin/analysis.cgi?id=pha000746">http://www.ncbi.nlm.nih.gov/projects/gap/cgi-bin/analysis.cgi?id=pha000746</a> |
| Metabolic | Lipidsmen | menhdl3b       | Age-sex adj HDL Offsp men ex3                     | <a href="http://www.ncbi.nlm.nih.gov/projects/gap/cgi-bin/analysis.cgi?id=pha000748">http://www.ncbi.nlm.nih.gov/projects/gap/cgi-bin/analysis.cgi?id=pha000748</a> |
| Metabolic | Lipidsmen | menhdl4b       | Age-sex adj HDL Offsp men ex4                     | <a href="http://www.ncbi.nlm.nih.gov/projects/gap/cgi-bin/analysis.cgi?id=pha000750">http://www.ncbi.nlm.nih.gov/projects/gap/cgi-bin/analysis.cgi?id=pha000750</a> |
| Metabolic | Lipidsmen | menhdl5b       | Age-sex adj HDL Offsp men ex5                     | <a href="http://www.ncbi.nlm.nih.gov/projects/gap/cgi-bin/analysis.cgi?id=pha000752">http://www.ncbi.nlm.nih.gov/projects/gap/cgi-bin/analysis.cgi?id=pha000752</a> |
| Metabolic | Lipidsmen | menhdl6b       | Age-sex adj HDL Offsp men ex6                     | <a href="http://www.ncbi.nlm.nih.gov/projects/gap/cgi-bin/analysis.cgi?id=pha000754">http://www.ncbi.nlm.nih.gov/projects/gap/cgi-bin/analysis.cgi?id=pha000754</a> |
| Metabolic | Lipidsmen | menhdl7b       | Age-sex adj HDL Offsp men ex7                     | <a href="http://www.ncbi.nlm.nih.gov/projects/gap/cgi-bin/analysis.cgi?id=pha000756">http://www.ncbi.nlm.nih.gov/projects/gap/cgi-bin/analysis.cgi?id=pha000756</a> |
| Metabolic | Lipidsmen | menHDLNMRint4a | Multivariable adj NMR HDL Int Offsp men ex4       | <a href="http://www.ncbi.nlm.nih.gov/projects/gap/cgi-bin/analysis.cgi?id=pha000810">http://www.ncbi.nlm.nih.gov/projects/gap/cgi-bin/analysis.cgi?id=pha000810</a> |
| Metabolic | Lipidsmen | menHDLNMRint4b | Age-sex adj NMR HDL Int Offsp men ex4             | <a href="http://www.ncbi.nlm.nih.gov/projects/gap/cgi-bin/analysis.cgi?id=pha000812">http://www.ncbi.nlm.nih.gov/projects/gap/cgi-bin/analysis.cgi?id=pha000812</a> |
| Metabolic | Lipidsmen | menHDLNMRlg4a  | Multivariable adj NMR HDL Lg Offsp men ex4        | <a href="http://www.ncbi.nlm.nih.gov/projects/gap/cgi-bin/analysis.cgi?id=pha000818">http://www.ncbi.nlm.nih.gov/projects/gap/cgi-bin/analysis.cgi?id=pha000818</a> |
| Metabolic | Lipidsmen | menHDLNMRlg4b  | Age-sex adj NMR HDL Lg Offsp men ex4              | <a href="http://www.ncbi.nlm.nih.gov/projects/gap/cgi-bin/analysis.cgi?id=pha000820">http://www.ncbi.nlm.nih.gov/projects/gap/cgi-bin/analysis.cgi?id=pha000820</a> |
| Metabolic | Lipidsmen | menHDLNMRsm4a  | Multivariable adj NMR HDL Sm Offsp men ex4        | <a href="http://www.ncbi.nlm.nih.gov/projects/gap/cgi-bin/analysis.cgi?id=pha000834">http://www.ncbi.nlm.nih.gov/projects/gap/cgi-bin/analysis.cgi?id=pha000834</a> |
| Metabolic | Lipidsmen | menHDLNMRsm4b  | Age-sex adj NMR HDL Sm Offsp men ex4              | <a href="http://www.ncbi.nlm.nih.gov/projects/gap/cgi-bin/analysis.cgi?id=pha000836">http://www.ncbi.nlm.nih.gov/projects/gap/cgi-bin/analysis.cgi?id=pha000836</a> |
| Metabolic | Lipidsmen | menHDLNMRsz4a  | Multivariable adj NMR HDL Size Offsp men ex4      | <a href="http://www.ncbi.nlm.nih.gov/projects/gap/cgi-bin/analysis.cgi?id=pha000826">http://www.ncbi.nlm.nih.gov/projects/gap/cgi-bin/analysis.cgi?id=pha000826</a> |
| Metabolic | Lipidsmen | menHDLNMRsz4b  | Age-sex adj NMR HDL Size Offsp men ex4            | <a href="http://www.ncbi.nlm.nih.gov/projects/gap/cgi-bin/analysis.cgi?id=pha000828">http://www.ncbi.nlm.nih.gov/projects/gap/cgi-bin/analysis.cgi?id=pha000828</a> |
| Metabolic | Lipidsmen | menldl1a       | Multivariable adj LDL Offsp men ex1               | <a href="http://www.ncbi.nlm.nih.gov/projects/gap/cgi-bin/analysis.cgi?id=pha000682">http://www.ncbi.nlm.nih.gov/projects/gap/cgi-bin/analysis.cgi?id=pha000682</a> |
| Metabolic | Lipidsmen | menldl1b       | Age-sex adj LDL Offsp men ex1                     | <a href="http://www.ncbi.nlm.nih.gov/projects/gap/cgi-bin/analysis.cgi?id=pha000774">http://www.ncbi.nlm.nih.gov/projects/gap/cgi-bin/analysis.cgi?id=pha000774</a> |
| Metabolic | Lipidsmen | menldl2b       | Age-sex adj LDL Offsp men ex2                     | <a href="http://www.ncbi.nlm.nih.gov/projects/gap/cgi-bin/analysis.cgi?id=pha000684">http://www.ncbi.nlm.nih.gov/projects/gap/cgi-bin/analysis.cgi?id=pha000684</a> |
| Metabolic | Lipidsmen | menldl3b       | Age-sex adj LDL Offsp men ex3                     | <a href="http://www.ncbi.nlm.nih.gov/projects/gap/cgi-bin/analysis.cgi?id=pha000686">http://www.ncbi.nlm.nih.gov/projects/gap/cgi-bin/analysis.cgi?id=pha000686</a> |
| Metabolic | Lipidsmen | menldl4b       | Age-sex adj LDL Offsp men ex4                     | <a href="http://www.ncbi.nlm.nih.gov/projects/gap/cgi-bin/analysis.cgi?id=pha000688">http://www.ncbi.nlm.nih.gov/projects/gap/cgi-bin/analysis.cgi?id=pha000688</a> |
| Metabolic | Lipidsmen | menldl5b       | Age-sex adj LDL Offsp men ex5                     | <a href="http://www.ncbi.nlm.nih.gov/projects/gap/cgi-bin/analysis.cgi?id=pha000690">http://www.ncbi.nlm.nih.gov/projects/gap/cgi-bin/analysis.cgi?id=pha000690</a> |
| Metabolic | Lipidsmen | menldl6b       | Age-sex adj LDL Offsp men ex6                     | <a href="http://www.ncbi.nlm.nih.gov/projects/gap/cgi-bin/analysis.cgi?id=pha000692">http://www.ncbi.nlm.nih.gov/projects/gap/cgi-bin/analysis.cgi?id=pha000692</a> |
| Metabolic | Lipidsmen | menldl7b       | Age-sex adj LDL Offsp men ex7                     | <a href="http://www.ncbi.nlm.nih.gov/projects/gap/cgi-bin/analysis.cgi?id=pha000694">http://www.ncbi.nlm.nih.gov/projects/gap/cgi-bin/analysis.cgi?id=pha000694</a> |
| Metabolic | Lipidsmen | menLDLNMRlg4a  | Multivariable adj NMR LDL Lg Offsp men ex4        | <a href="http://www.ncbi.nlm.nih.gov/projects/gap/cgi-bin/analysis.cgi?id=pha000842">http://www.ncbi.nlm.nih.gov/projects/gap/cgi-bin/analysis.cgi?id=pha000842</a> |
| Metabolic | Lipidsmen | menLDLNMRlg4b  | Age-sex adj NMR LDL Lg Offsp men ex4              | <a href="http://www.ncbi.nlm.nih.gov/projects/gap/cgi-bin/analysis.cgi?id=pha000844">http://www.ncbi.nlm.nih.gov/projects/gap/cgi-bin/analysis.cgi?id=pha000844</a> |
| Metabolic | Lipidsmen | menLDLNMRsm4a  | Multivariable adj NMR LDL Sm Offsp men ex4        | <a href="http://www.ncbi.nlm.nih.gov/projects/gap/cgi-bin/analysis.cgi?id=pha000858">http://www.ncbi.nlm.nih.gov/projects/gap/cgi-bin/analysis.cgi?id=pha000858</a> |
| Metabolic | Lipidsmen | menLDLNMRsm4b  | Age-sex adj NMR LDL Sm Offsp men ex4              | <a href="http://www.ncbi.nlm.nih.gov/projects/gap/cgi-bin/analysis.cgi?id=pha000860">http://www.ncbi.nlm.nih.gov/projects/gap/cgi-bin/analysis.cgi?id=pha000860</a> |
| Metabolic | Lipidsmen | menLDLNMRsz4a  | Multivariable adj NMR LDL Size Offsp men ex4      | <a href="http://www.ncbi.nlm.nih.gov/projects/gap/cgi-bin/analysis.cgi?id=pha000850">http://www.ncbi.nlm.nih.gov/projects/gap/cgi-bin/analysis.cgi?id=pha000850</a> |
| Metabolic | Lipidsmen | menLDLNMRsz4b  | Age-sex adj NMR LDL Size Offsp men ex4            | <a href="http://www.ncbi.nlm.nih.gov/projects/gap/cgi-bin/analysis.cgi?id=pha000852">http://www.ncbi.nlm.nih.gov/projects/gap/cgi-bin/analysis.cgi?id=pha000852</a> |
| Metabolic | Lipidsmen | menmeanchola   | Multivariable adj Mean Chol Offsp men ex1-7       | <a href="http://www.ncbi.nlm.nih.gov/projects/gap/cgi-bin/analysis.cgi?id=pha000794">http://www.ncbi.nlm.nih.gov/projects/gap/cgi-bin/analysis.cgi?id=pha000794</a> |

Online Table 1: Phenotypes Evaluated for Association using Population-based Analysis (GEE)

| Group     | Category    | Trait Label       | Name                                              | GEE Link                                                                                                                                                            |
|-----------|-------------|-------------------|---------------------------------------------------|---------------------------------------------------------------------------------------------------------------------------------------------------------------------|
| Metabolic | Lipidsmen   | menmeancholb      | Age-sex adj Mean Chol Offsp men ex1-7             | <a href="http://www.ncbi.nlm.nih.gov/projects/gap/cgi-bin/analysis.cgi?id=pha000796">http://www.ncbi.nlm.nih.gov/projects/gap/cgi-bin/analysis.cgi?id=pha000796</a> |
| Metabolic | Lipidsmen   | menmeanhdla       | Multivariable adj Mean HDL Offsp men ex1-7        | <a href="http://www.ncbi.nlm.nih.gov/projects/gap/cgi-bin/analysis.cgi?id=pha000802">http://www.ncbi.nlm.nih.gov/projects/gap/cgi-bin/analysis.cgi?id=pha000802</a> |
| Metabolic | Lipidsmen   | menmeanhdlb       | Age-sex adj Mean HDL Offsp men ex1-7              | <a href="http://www.ncbi.nlm.nih.gov/projects/gap/cgi-bin/analysis.cgi?id=pha000804">http://www.ncbi.nlm.nih.gov/projects/gap/cgi-bin/analysis.cgi?id=pha000804</a> |
| Metabolic | Lipidsmen   | menmeanldla       | Multivariable adj Mean LDL Offsp men ex1-7        | <a href="http://www.ncbi.nlm.nih.gov/projects/gap/cgi-bin/analysis.cgi?id=pha000786">http://www.ncbi.nlm.nih.gov/projects/gap/cgi-bin/analysis.cgi?id=pha000786</a> |
| Metabolic | Lipidsmen   | menmeanldlb       | Age-sex adj Mean LDL Offsp men ex1-7              | <a href="http://www.ncbi.nlm.nih.gov/projects/gap/cgi-bin/analysis.cgi?id=pha000788">http://www.ncbi.nlm.nih.gov/projects/gap/cgi-bin/analysis.cgi?id=pha000788</a> |
| Metabolic | Lipidsmen   | menmeantga        | Multivariable adj Mean TG Offsp men ex1-7         | <a href="http://www.ncbi.nlm.nih.gov/projects/gap/cgi-bin/analysis.cgi?id=pha000778">http://www.ncbi.nlm.nih.gov/projects/gap/cgi-bin/analysis.cgi?id=pha000778</a> |
| Metabolic | Lipidsmen   | menmeantgb        | Age-sex adj Mean TG Offsp men ex1-7               | <a href="http://www.ncbi.nlm.nih.gov/projects/gap/cgi-bin/analysis.cgi?id=pha000780">http://www.ncbi.nlm.nih.gov/projects/gap/cgi-bin/analysis.cgi?id=pha000780</a> |
| Metabolic | Lipidsmen   | mentg1a           | Multivariable adj TG Offsp men ex1                | <a href="http://www.ncbi.nlm.nih.gov/projects/gap/cgi-bin/analysis.cgi?id=pha000636">http://www.ncbi.nlm.nih.gov/projects/gap/cgi-bin/analysis.cgi?id=pha000636</a> |
| Metabolic | Lipidsmen   | mentg1b           | Age-sex adj TG Offsp men ex1                      | <a href="http://www.ncbi.nlm.nih.gov/projects/gap/cgi-bin/analysis.cgi?id=pha000638">http://www.ncbi.nlm.nih.gov/projects/gap/cgi-bin/analysis.cgi?id=pha000638</a> |
| Metabolic | Lipidsmen   | mentg2b           | Age-sex adj TG Offsp men ex2                      | <a href="http://www.ncbi.nlm.nih.gov/projects/gap/cgi-bin/analysis.cgi?id=pha000640">http://www.ncbi.nlm.nih.gov/projects/gap/cgi-bin/analysis.cgi?id=pha000640</a> |
| Metabolic | Lipidsmen   | mentg3b           | Age-sex adj TG Offsp men ex3                      | <a href="http://www.ncbi.nlm.nih.gov/projects/gap/cgi-bin/analysis.cgi?id=pha000642">http://www.ncbi.nlm.nih.gov/projects/gap/cgi-bin/analysis.cgi?id=pha000642</a> |
| Metabolic | Lipidsmen   | mentg4b           | Age-sex adj TG Offsp men ex4                      | <a href="http://www.ncbi.nlm.nih.gov/projects/gap/cgi-bin/analysis.cgi?id=pha000644">http://www.ncbi.nlm.nih.gov/projects/gap/cgi-bin/analysis.cgi?id=pha000644</a> |
| Metabolic | Lipidsmen   | mentg5b           | Age-sex adj TG Offsp men ex5                      | <a href="http://www.ncbi.nlm.nih.gov/projects/gap/cgi-bin/analysis.cgi?id=pha000646">http://www.ncbi.nlm.nih.gov/projects/gap/cgi-bin/analysis.cgi?id=pha000646</a> |
| Metabolic | Lipidsmen   | mentg6b           | Age-sex adj TG Offsp men ex6                      | <a href="http://www.ncbi.nlm.nih.gov/projects/gap/cgi-bin/analysis.cgi?id=pha000648">http://www.ncbi.nlm.nih.gov/projects/gap/cgi-bin/analysis.cgi?id=pha000648</a> |
| Metabolic | Lipidsmen   | mentg7b           | Age-sex adj TG Offsp men ex7                      | <a href="http://www.ncbi.nlm.nih.gov/projects/gap/cgi-bin/analysis.cgi?id=pha000650">http://www.ncbi.nlm.nih.gov/projects/gap/cgi-bin/analysis.cgi?id=pha000650</a> |
| Metabolic | Lipidsmen   | menVLDLNMRIint4a  | Multivariable adj NMR VLDL Int Offsp men ex4      | <a href="http://www.ncbi.nlm.nih.gov/projects/gap/cgi-bin/analysis.cgi?id=pha000870">http://www.ncbi.nlm.nih.gov/projects/gap/cgi-bin/analysis.cgi?id=pha000870</a> |
| Metabolic | Lipidsmen   | menVLDLNMRIint4b  | Age-sex adj NMR VLDL Int Offsp men ex4            | <a href="http://www.ncbi.nlm.nih.gov/projects/gap/cgi-bin/analysis.cgi?id=pha000872">http://www.ncbi.nlm.nih.gov/projects/gap/cgi-bin/analysis.cgi?id=pha000872</a> |
| Metabolic | Lipidsmen   | menVLDLNMRIg4a    | Multivariable adj NMR VLDL Lg Offsp men ex4       | <a href="http://www.ncbi.nlm.nih.gov/projects/gap/cgi-bin/analysis.cgi?id=pha000882">http://www.ncbi.nlm.nih.gov/projects/gap/cgi-bin/analysis.cgi?id=pha000882</a> |
| Metabolic | Lipidsmen   | menVLDLNMRIg4b    | Age-sex adj NMR VLDL Lg Offsp men ex4             | <a href="http://www.ncbi.nlm.nih.gov/projects/gap/cgi-bin/analysis.cgi?id=pha000884">http://www.ncbi.nlm.nih.gov/projects/gap/cgi-bin/analysis.cgi?id=pha000884</a> |
| Metabolic | Lipidsmen   | menVLDLNMRIsm4a   | Multivariable adj NMR VLDL Sm Offsp men ex4       | <a href="http://www.ncbi.nlm.nih.gov/projects/gap/cgi-bin/analysis.cgi?id=pha000906">http://www.ncbi.nlm.nih.gov/projects/gap/cgi-bin/analysis.cgi?id=pha000906</a> |
| Metabolic | Lipidsmen   | menVLDLNMRIsm4b   | Age-sex adj NMR VLDL Sm Offsp men ex4             | <a href="http://www.ncbi.nlm.nih.gov/projects/gap/cgi-bin/analysis.cgi?id=pha000908">http://www.ncbi.nlm.nih.gov/projects/gap/cgi-bin/analysis.cgi?id=pha000908</a> |
| Metabolic | Lipidsmen   | menVLDLNMRIksz4a  | Multivariable adj NMR VLDL Size Offsp men ex4     | <a href="http://www.ncbi.nlm.nih.gov/projects/gap/cgi-bin/analysis.cgi?id=pha000894">http://www.ncbi.nlm.nih.gov/projects/gap/cgi-bin/analysis.cgi?id=pha000894</a> |
| Metabolic | Lipidsmen   | menVLDLNMRIksz4b  | Age-sex adj NMR VLDL Size Offsp men ex4           | <a href="http://www.ncbi.nlm.nih.gov/projects/gap/cgi-bin/analysis.cgi?id=pha000896">http://www.ncbi.nlm.nih.gov/projects/gap/cgi-bin/analysis.cgi?id=pha000896</a> |
| Metabolic | Lipidswomen | womenApoB4a       | Multivariable adj Plasma ApoB Level Offsp wom ex4 | <a href="http://www.ncbi.nlm.nih.gov/projects/gap/cgi-bin/analysis.cgi?id=pha000920">http://www.ncbi.nlm.nih.gov/projects/gap/cgi-bin/analysis.cgi?id=pha000920</a> |
| Metabolic | Lipidswomen | womenApoB4b       | Age-sex adj Plasma ApoB Level Offsp wom ex4       | <a href="http://www.ncbi.nlm.nih.gov/projects/gap/cgi-bin/analysis.cgi?id=pha000922">http://www.ncbi.nlm.nih.gov/projects/gap/cgi-bin/analysis.cgi?id=pha000922</a> |
| Metabolic | Lipidswomen | womenchol1a       | Multivariable adj Chol Offsp wom ex1              | <a href="http://www.ncbi.nlm.nih.gov/projects/gap/cgi-bin/analysis.cgi?id=pha000726">http://www.ncbi.nlm.nih.gov/projects/gap/cgi-bin/analysis.cgi?id=pha000726</a> |
| Metabolic | Lipidswomen | womenchol1b       | Age-sex adj Chol Offsp wom ex1                    | <a href="http://www.ncbi.nlm.nih.gov/projects/gap/cgi-bin/analysis.cgi?id=pha000728">http://www.ncbi.nlm.nih.gov/projects/gap/cgi-bin/analysis.cgi?id=pha000728</a> |
| Metabolic | Lipidswomen | womenchol2b       | Age-sex adj Chol Offsp wom ex2                    | <a href="http://www.ncbi.nlm.nih.gov/projects/gap/cgi-bin/analysis.cgi?id=pha000730">http://www.ncbi.nlm.nih.gov/projects/gap/cgi-bin/analysis.cgi?id=pha000730</a> |
| Metabolic | Lipidswomen | womenchol3b       | Age-sex adj Chol Offsp wom ex3                    | <a href="http://www.ncbi.nlm.nih.gov/projects/gap/cgi-bin/analysis.cgi?id=pha000732">http://www.ncbi.nlm.nih.gov/projects/gap/cgi-bin/analysis.cgi?id=pha000732</a> |
| Metabolic | Lipidswomen | womenchol4b       | Age-sex adj Chol Offsp wom ex4                    | <a href="http://www.ncbi.nlm.nih.gov/projects/gap/cgi-bin/analysis.cgi?id=pha000734">http://www.ncbi.nlm.nih.gov/projects/gap/cgi-bin/analysis.cgi?id=pha000734</a> |
| Metabolic | Lipidswomen | womenchol5b       | Age-sex adj Chol Offsp wom ex5                    | <a href="http://www.ncbi.nlm.nih.gov/projects/gap/cgi-bin/analysis.cgi?id=pha000736">http://www.ncbi.nlm.nih.gov/projects/gap/cgi-bin/analysis.cgi?id=pha000736</a> |
| Metabolic | Lipidswomen | womenchol6b       | Age-sex adj Chol Offsp wom ex6                    | <a href="http://www.ncbi.nlm.nih.gov/projects/gap/cgi-bin/analysis.cgi?id=pha000738">http://www.ncbi.nlm.nih.gov/projects/gap/cgi-bin/analysis.cgi?id=pha000738</a> |
| Metabolic | Lipidswomen | womenchol7b       | Age-sex adj Chol Offsp wom ex7                    | <a href="http://www.ncbi.nlm.nih.gov/projects/gap/cgi-bin/analysis.cgi?id=pha000740">http://www.ncbi.nlm.nih.gov/projects/gap/cgi-bin/analysis.cgi?id=pha000740</a> |
| Metabolic | Lipidswomen | womenhdl1a        | Multivariable adj HDL Offsp wom ex1               | <a href="http://www.ncbi.nlm.nih.gov/projects/gap/cgi-bin/analysis.cgi?id=pha000758">http://www.ncbi.nlm.nih.gov/projects/gap/cgi-bin/analysis.cgi?id=pha000758</a> |
| Metabolic | Lipidswomen | womenhdl1b        | Age-sex adj HDL Offsp wom ex1                     | <a href="http://www.ncbi.nlm.nih.gov/projects/gap/cgi-bin/analysis.cgi?id=pha000760">http://www.ncbi.nlm.nih.gov/projects/gap/cgi-bin/analysis.cgi?id=pha000760</a> |
| Metabolic | Lipidswomen | womenhdl2b        | Age-sex adj HDL Offsp wom ex2                     | <a href="http://www.ncbi.nlm.nih.gov/projects/gap/cgi-bin/analysis.cgi?id=pha000762">http://www.ncbi.nlm.nih.gov/projects/gap/cgi-bin/analysis.cgi?id=pha000762</a> |
| Metabolic | Lipidswomen | womenhdl3b        | Age-sex adj HDL Offsp wom ex3                     | <a href="http://www.ncbi.nlm.nih.gov/projects/gap/cgi-bin/analysis.cgi?id=pha000764">http://www.ncbi.nlm.nih.gov/projects/gap/cgi-bin/analysis.cgi?id=pha000764</a> |
| Metabolic | Lipidswomen | womenhdl4b        | Age-sex adj HDL Offsp wom ex4                     | <a href="http://www.ncbi.nlm.nih.gov/projects/gap/cgi-bin/analysis.cgi?id=pha000766">http://www.ncbi.nlm.nih.gov/projects/gap/cgi-bin/analysis.cgi?id=pha000766</a> |
| Metabolic | Lipidswomen | womenhdl5b        | Age-sex adj HDL Offsp wom ex5                     | <a href="http://www.ncbi.nlm.nih.gov/projects/gap/cgi-bin/analysis.cgi?id=pha000768">http://www.ncbi.nlm.nih.gov/projects/gap/cgi-bin/analysis.cgi?id=pha000768</a> |
| Metabolic | Lipidswomen | womenhdl6b        | Age-sex adj HDL Offsp wom ex6                     | <a href="http://www.ncbi.nlm.nih.gov/projects/gap/cgi-bin/analysis.cgi?id=pha000770">http://www.ncbi.nlm.nih.gov/projects/gap/cgi-bin/analysis.cgi?id=pha000770</a> |
| Metabolic | Lipidswomen | womenhdl7b        | Age-sex adj HDL Offsp wom ex7                     | <a href="http://www.ncbi.nlm.nih.gov/projects/gap/cgi-bin/analysis.cgi?id=pha000772">http://www.ncbi.nlm.nih.gov/projects/gap/cgi-bin/analysis.cgi?id=pha000772</a> |
| Metabolic | Lipidswomen | womenHDLNMRIint4a | Multivariable adj NMR HDL Int Offsp wom ex4       | <a href="http://www.ncbi.nlm.nih.gov/projects/gap/cgi-bin/analysis.cgi?id=pha000814">http://www.ncbi.nlm.nih.gov/projects/gap/cgi-bin/analysis.cgi?id=pha000814</a> |
| Metabolic | Lipidswomen | womenHDLNMRIint4b | Age-sex adj NMR HDL Int Offsp wom ex4             | <a href="http://www.ncbi.nlm.nih.gov/projects/gap/cgi-bin/analysis.cgi?id=pha000816">http://www.ncbi.nlm.nih.gov/projects/gap/cgi-bin/analysis.cgi?id=pha000816</a> |
| Metabolic | Lipidswomen | womenHDLNMRIg4a   | Multivariable adj NMR HDL Lg Offsp wom ex4        | <a href="http://www.ncbi.nlm.nih.gov/projects/gap/cgi-bin/analysis.cgi?id=pha000822">http://www.ncbi.nlm.nih.gov/projects/gap/cgi-bin/analysis.cgi?id=pha000822</a> |
| Metabolic | Lipidswomen | womenHDLNMRIg4b   | Age-sex adj NMR HDL Lg Offsp wom ex4              | <a href="http://www.ncbi.nlm.nih.gov/projects/gap/cgi-bin/analysis.cgi?id=pha000824">http://www.ncbi.nlm.nih.gov/projects/gap/cgi-bin/analysis.cgi?id=pha000824</a> |
| Metabolic | Lipidswomen | womenHDLNMRIsm4a  | Multivariable adj NMR HDL Sm Offsp wom ex4        | <a href="http://www.ncbi.nlm.nih.gov/projects/gap/cgi-bin/analysis.cgi?id=pha000838">http://www.ncbi.nlm.nih.gov/projects/gap/cgi-bin/analysis.cgi?id=pha000838</a> |
| Metabolic | Lipidswomen | womenHDLNMRIsm4b  | Age-sex adj NMR HDL Sm Offsp wom ex4              | <a href="http://www.ncbi.nlm.nih.gov/projects/gap/cgi-bin/analysis.cgi?id=pha000840">http://www.ncbi.nlm.nih.gov/projects/gap/cgi-bin/analysis.cgi?id=pha000840</a> |
| Metabolic | Lipidswomen | womenHDLNMRIksz4a | Multivariable adj NMR HDL Size Offsp wom ex4      | <a href="http://www.ncbi.nlm.nih.gov/projects/gap/cgi-bin/analysis.cgi?id=pha000832">http://www.ncbi.nlm.nih.gov/projects/gap/cgi-bin/analysis.cgi?id=pha000832</a> |
| Metabolic | Lipidswomen | womenHDLNMRIksz4b | Age-sex adj NMR HDL Size Offsp wom ex4            | <a href="http://www.ncbi.nlm.nih.gov/projects/gap/cgi-bin/analysis.cgi?id=pha000834">http://www.ncbi.nlm.nih.gov/projects/gap/cgi-bin/analysis.cgi?id=pha000834</a> |
| Metabolic | Lipidswomen | womenldl1a        | Multivariable adj LDL Offsp wom ex1               | <a href="http://www.ncbi.nlm.nih.gov/projects/gap/cgi-bin/analysis.cgi?id=pha000696">http://www.ncbi.nlm.nih.gov/projects/gap/cgi-bin/analysis.cgi?id=pha000696</a> |
| Metabolic | Lipidswomen | womenldl1b        | Age-sex adj LDL Offsp wom ex1                     | <a href="http://www.ncbi.nlm.nih.gov/projects/gap/cgi-bin/analysis.cgi?id=pha000776">http://www.ncbi.nlm.nih.gov/projects/gap/cgi-bin/analysis.cgi?id=pha000776</a> |
| Metabolic | Lipidswomen | womenldl2b        | Age-sex adj LDL Offsp wom ex2                     | <a href="http://www.ncbi.nlm.nih.gov/projects/gap/cgi-bin/analysis.cgi?id=pha000698">http://www.ncbi.nlm.nih.gov/projects/gap/cgi-bin/analysis.cgi?id=pha000698</a> |
| Metabolic | Lipidswomen | womenldl3b        | Age-sex adj LDL Offsp wom ex3                     | <a href="http://www.ncbi.nlm.nih.gov/projects/gap/cgi-bin/analysis.cgi?id=pha000700">http://www.ncbi.nlm.nih.gov/projects/gap/cgi-bin/analysis.cgi?id=pha000700</a> |
| Metabolic | Lipidswomen | womenldl4b        | Age-sex adj LDL Offsp wom ex4                     | <a href="http://www.ncbi.nlm.nih.gov/projects/gap/cgi-bin/analysis.cgi?id=pha000702">http://www.ncbi.nlm.nih.gov/projects/gap/cgi-bin/analysis.cgi?id=pha000702</a> |
| Metabolic | Lipidswomen | womenldl5b        | Age-sex adj LDL Offsp wom ex5                     | <a href="http://www.ncbi.nlm.nih.gov/projects/gap/cgi-bin/analysis.cgi?id=pha000704">http://www.ncbi.nlm.nih.gov/projects/gap/cgi-bin/analysis.cgi?id=pha000704</a> |

Online Table 1: Phenotypes Evaluated for Association using Population-based Analysis (GEE)

| Group     | Category         | Trait Label        | Name                                                                | GEE Link                                                                                                                                                            |
|-----------|------------------|--------------------|---------------------------------------------------------------------|---------------------------------------------------------------------------------------------------------------------------------------------------------------------|
| Metabolic | Lipidswomen      | womenldl6b         | Age-sex adj LDL Offsp wom ex6                                       | <a href="http://www.ncbi.nlm.nih.gov/projects/gap/cgi-bin/analysis.cgi?id=pha000706">http://www.ncbi.nlm.nih.gov/projects/gap/cgi-bin/analysis.cgi?id=pha000706</a> |
| Metabolic | Lipidswomen      | womenldl7b         | Age-sex adj LDL Offsp wom ex7                                       | <a href="http://www.ncbi.nlm.nih.gov/projects/gap/cgi-bin/analysis.cgi?id=pha000708">http://www.ncbi.nlm.nih.gov/projects/gap/cgi-bin/analysis.cgi?id=pha000708</a> |
| Metabolic | Lipidswomen      | womenLDLNMRIg4a    | Multivariable adj NMR LDL Lg Offsp wom ex4                          | <a href="http://www.ncbi.nlm.nih.gov/projects/gap/cgi-bin/analysis.cgi?id=pha000846">http://www.ncbi.nlm.nih.gov/projects/gap/cgi-bin/analysis.cgi?id=pha000846</a> |
| Metabolic | Lipidswomen      | womenLDLNMRIg4b    | Age-sex adj NMR LDL Lg Offsp wom ex4                                | <a href="http://www.ncbi.nlm.nih.gov/projects/gap/cgi-bin/analysis.cgi?id=pha000848">http://www.ncbi.nlm.nih.gov/projects/gap/cgi-bin/analysis.cgi?id=pha000848</a> |
| Metabolic | Lipidswomen      | womenLDLNRsm4a     | Multivariable adj NMR LDL Sm Offsp wom ex4                          | <a href="http://www.ncbi.nlm.nih.gov/projects/gap/cgi-bin/analysis.cgi?id=pha000862">http://www.ncbi.nlm.nih.gov/projects/gap/cgi-bin/analysis.cgi?id=pha000862</a> |
| Metabolic | Lipidswomen      | womenLDLNRsm4b     | Age-sex adj NMR LDL Sm Offsp wom ex4                                | <a href="http://www.ncbi.nlm.nih.gov/projects/gap/cgi-bin/analysis.cgi?id=pha000864">http://www.ncbi.nlm.nih.gov/projects/gap/cgi-bin/analysis.cgi?id=pha000864</a> |
| Metabolic | Lipidswomen      | womenLDLNRsz4a     | Multivariable adj NMR LDL Size Offsp wom ex4                        | <a href="http://www.ncbi.nlm.nih.gov/projects/gap/cgi-bin/analysis.cgi?id=pha000854">http://www.ncbi.nlm.nih.gov/projects/gap/cgi-bin/analysis.cgi?id=pha000854</a> |
| Metabolic | Lipidswomen      | womenLDLNRsz4b     | Age-sex adj NMR LDL Size Offsp wom ex4                              | <a href="http://www.ncbi.nlm.nih.gov/projects/gap/cgi-bin/analysis.cgi?id=pha000856">http://www.ncbi.nlm.nih.gov/projects/gap/cgi-bin/analysis.cgi?id=pha000856</a> |
| Metabolic | Lipidswomen      | womenmeanhola      | Multivariable adj Mean Chol Offsp wom ex1-7                         | <a href="http://www.ncbi.nlm.nih.gov/projects/gap/cgi-bin/analysis.cgi?id=pha000798">http://www.ncbi.nlm.nih.gov/projects/gap/cgi-bin/analysis.cgi?id=pha000798</a> |
| Metabolic | Lipidswomen      | womenmeancholb     | Age-sex adj Mean Chol Offsp wom ex1-7                               | <a href="http://www.ncbi.nlm.nih.gov/projects/gap/cgi-bin/analysis.cgi?id=pha000800">http://www.ncbi.nlm.nih.gov/projects/gap/cgi-bin/analysis.cgi?id=pha000800</a> |
| Metabolic | Lipidswomen      | womenmeanhdla      | Multivariable adj Mean HDL Offsp wom ex1-7                          | <a href="http://www.ncbi.nlm.nih.gov/projects/gap/cgi-bin/analysis.cgi?id=pha000806">http://www.ncbi.nlm.nih.gov/projects/gap/cgi-bin/analysis.cgi?id=pha000806</a> |
| Metabolic | Lipidswomen      | womenmeanhldb      | Age-sex adj Mean HDL Offsp wom ex1-7                                | <a href="http://www.ncbi.nlm.nih.gov/projects/gap/cgi-bin/analysis.cgi?id=pha000808">http://www.ncbi.nlm.nih.gov/projects/gap/cgi-bin/analysis.cgi?id=pha000808</a> |
| Metabolic | Lipidswomen      | womenmeanldla      | Multivariable adj Mean LDL Offsp wom ex1-7                          | <a href="http://www.ncbi.nlm.nih.gov/projects/gap/cgi-bin/analysis.cgi?id=pha000790">http://www.ncbi.nlm.nih.gov/projects/gap/cgi-bin/analysis.cgi?id=pha000790</a> |
| Metabolic | Lipidswomen      | womenmeanldlb      | Age-sex adj Mean LDL Offsp wom ex1-7                                | <a href="http://www.ncbi.nlm.nih.gov/projects/gap/cgi-bin/analysis.cgi?id=pha000792">http://www.ncbi.nlm.nih.gov/projects/gap/cgi-bin/analysis.cgi?id=pha000792</a> |
| Metabolic | Lipidswomen      | womenmeantga       | Multivariable adj Mean TG Offsp wom ex1-7                           | <a href="http://www.ncbi.nlm.nih.gov/projects/gap/cgi-bin/analysis.cgi?id=pha000782">http://www.ncbi.nlm.nih.gov/projects/gap/cgi-bin/analysis.cgi?id=pha000782</a> |
| Metabolic | Lipidswomen      | womenmeantgb       | Age-sex adj Mean TG Offsp wom ex1-7                                 | <a href="http://www.ncbi.nlm.nih.gov/projects/gap/cgi-bin/analysis.cgi?id=pha000784">http://www.ncbi.nlm.nih.gov/projects/gap/cgi-bin/analysis.cgi?id=pha000784</a> |
| Metabolic | Lipidswomen      | womentg1a          | Multivariable adj TG Offsp wom ex1                                  | <a href="http://www.ncbi.nlm.nih.gov/projects/gap/cgi-bin/analysis.cgi?id=pha000652">http://www.ncbi.nlm.nih.gov/projects/gap/cgi-bin/analysis.cgi?id=pha000652</a> |
| Metabolic | Lipidswomen      | womentg1b          | Age-sex adj TG Offsp wom ex1                                        | <a href="http://www.ncbi.nlm.nih.gov/projects/gap/cgi-bin/analysis.cgi?id=pha000654">http://www.ncbi.nlm.nih.gov/projects/gap/cgi-bin/analysis.cgi?id=pha000654</a> |
| Metabolic | Lipidswomen      | womentg2b          | Age-sex adj TG Offsp wom ex2                                        | <a href="http://www.ncbi.nlm.nih.gov/projects/gap/cgi-bin/analysis.cgi?id=pha000656">http://www.ncbi.nlm.nih.gov/projects/gap/cgi-bin/analysis.cgi?id=pha000656</a> |
| Metabolic | Lipidswomen      | womentg3b          | Age-sex adj TG Offsp wom ex3                                        | <a href="http://www.ncbi.nlm.nih.gov/projects/gap/cgi-bin/analysis.cgi?id=pha000658">http://www.ncbi.nlm.nih.gov/projects/gap/cgi-bin/analysis.cgi?id=pha000658</a> |
| Metabolic | Lipidswomen      | womentg4b          | Age-sex adj TG Offsp wom ex4                                        | <a href="http://www.ncbi.nlm.nih.gov/projects/gap/cgi-bin/analysis.cgi?id=pha000660">http://www.ncbi.nlm.nih.gov/projects/gap/cgi-bin/analysis.cgi?id=pha000660</a> |
| Metabolic | Lipidswomen      | womentg5b          | Age-sex adj TG Offsp wom ex5                                        | <a href="http://www.ncbi.nlm.nih.gov/projects/gap/cgi-bin/analysis.cgi?id=pha000662">http://www.ncbi.nlm.nih.gov/projects/gap/cgi-bin/analysis.cgi?id=pha000662</a> |
| Metabolic | Lipidswomen      | womentg6b          | Age-sex adj TG Offsp wom ex6                                        | <a href="http://www.ncbi.nlm.nih.gov/projects/gap/cgi-bin/analysis.cgi?id=pha000664">http://www.ncbi.nlm.nih.gov/projects/gap/cgi-bin/analysis.cgi?id=pha000664</a> |
| Metabolic | Lipidswomen      | womentg7b          | Age-sex adj TG Offsp wom ex7                                        | <a href="http://www.ncbi.nlm.nih.gov/projects/gap/cgi-bin/analysis.cgi?id=pha000666">http://www.ncbi.nlm.nih.gov/projects/gap/cgi-bin/analysis.cgi?id=pha000666</a> |
| Metabolic | Lipidswomen      | womenVLDLNRint4a   | Multivariable adj NMR VLDL Int Offsp wom ex4                        | <a href="http://www.ncbi.nlm.nih.gov/projects/gap/cgi-bin/analysis.cgi?id=pha000874">http://www.ncbi.nlm.nih.gov/projects/gap/cgi-bin/analysis.cgi?id=pha000874</a> |
| Metabolic | Lipidswomen      | womenVLDLNRint4b   | Age-sex adj NMR VLDL Int Offsp wom ex4                              | <a href="http://www.ncbi.nlm.nih.gov/projects/gap/cgi-bin/analysis.cgi?id=pha000876">http://www.ncbi.nlm.nih.gov/projects/gap/cgi-bin/analysis.cgi?id=pha000876</a> |
| Metabolic | Lipidswomen      | womenVLDLNMRIg4a   | Multivariable adj NMR VLDL Lg Offsp wom ex4                         | <a href="http://www.ncbi.nlm.nih.gov/projects/gap/cgi-bin/analysis.cgi?id=pha000886">http://www.ncbi.nlm.nih.gov/projects/gap/cgi-bin/analysis.cgi?id=pha000886</a> |
| Metabolic | Lipidswomen      | womenVLDLNMRIg4b   | Age-sex adj NMR VLDL Lg Offsp wom ex4                               | <a href="http://www.ncbi.nlm.nih.gov/projects/gap/cgi-bin/analysis.cgi?id=pha000888">http://www.ncbi.nlm.nih.gov/projects/gap/cgi-bin/analysis.cgi?id=pha000888</a> |
| Metabolic | Lipidswomen      | womenVLDLNRsm4a    | Multivariable adj NMR VLDL Sm Offsp wom ex4                         | <a href="http://www.ncbi.nlm.nih.gov/projects/gap/cgi-bin/analysis.cgi?id=pha000910">http://www.ncbi.nlm.nih.gov/projects/gap/cgi-bin/analysis.cgi?id=pha000910</a> |
| Metabolic | Lipidswomen      | womenVLDLNRsm4b    | Age-sex NMR VLDL Sm Offsp wom ex4                                   | <a href="http://www.ncbi.nlm.nih.gov/projects/gap/cgi-bin/analysis.cgi?id=pha000912">http://www.ncbi.nlm.nih.gov/projects/gap/cgi-bin/analysis.cgi?id=pha000912</a> |
| Metabolic | Lipidswomen      | womenVLDLNRsz4a    | Multivariable adj NMR VLDL Size Offsp wom ex4                       | <a href="http://www.ncbi.nlm.nih.gov/projects/gap/cgi-bin/analysis.cgi?id=pha000898">http://www.ncbi.nlm.nih.gov/projects/gap/cgi-bin/analysis.cgi?id=pha000898</a> |
| Metabolic | Lipidswomen      | womenVLDLNRsz4b    | Age-sex adj NMR VLDL Size Offsp wom ex4                             | <a href="http://www.ncbi.nlm.nih.gov/projects/gap/cgi-bin/analysis.cgi?id=pha000900">http://www.ncbi.nlm.nih.gov/projects/gap/cgi-bin/analysis.cgi?id=pha000900</a> |
| Pulmonary | Circadian        | bedtime            | usual weekday bedtime unadjusted                                    | <a href="http://www.ncbi.nlm.nih.gov/projects/gap/cgi-bin/analysis.cgi?id=pha000006">http://www.ncbi.nlm.nih.gov/projects/gap/cgi-bin/analysis.cgi?id=pha000006</a> |
| Pulmonary | Circadian        | bedtimeresid       | usual weekday bedtime adjusted                                      | <a href="http://www.ncbi.nlm.nih.gov/projects/gap/cgi-bin/analysis.cgi?id=pha000008">http://www.ncbi.nlm.nih.gov/projects/gap/cgi-bin/analysis.cgi?id=pha000008</a> |
| Pulmonary | Circadian        | sleepdur           | usual weekday sleep duration unadjusted                             | <a href="http://www.ncbi.nlm.nih.gov/projects/gap/cgi-bin/analysis.cgi?id=pha000010">http://www.ncbi.nlm.nih.gov/projects/gap/cgi-bin/analysis.cgi?id=pha000010</a> |
| Pulmonary | Circadian        | sleepdurrenid      | usual weekday sleep duration adjusted                               | <a href="http://www.ncbi.nlm.nih.gov/projects/gap/cgi-bin/analysis.cgi?id=pha000012">http://www.ncbi.nlm.nih.gov/projects/gap/cgi-bin/analysis.cgi?id=pha000012</a> |
| Pulmonary | longitudinal     | fef2575long        | rate of decline of FEF(25-75)                                       | <a href="http://www.ncbi.nlm.nih.gov/projects/gap/cgi-bin/analysis.cgi?id=pha000014">http://www.ncbi.nlm.nih.gov/projects/gap/cgi-bin/analysis.cgi?id=pha000014</a> |
| Pulmonary | longitudinal     | fef2575longsmoke10 | rate of decline of FEF(25-75) in 10+ packyear smokers               | <a href="http://www.ncbi.nlm.nih.gov/projects/gap/cgi-bin/analysis.cgi?id=pha000016">http://www.ncbi.nlm.nih.gov/projects/gap/cgi-bin/analysis.cgi?id=pha000016</a> |
| Pulmonary | longitudinal     | feffvclong         | rate of decline of FEF(25-75)/FVC                                   | <a href="http://www.ncbi.nlm.nih.gov/projects/gap/cgi-bin/analysis.cgi?id=pha000018">http://www.ncbi.nlm.nih.gov/projects/gap/cgi-bin/analysis.cgi?id=pha000018</a> |
| Pulmonary | longitudinal     | feffvclongsmoke10  | rate of decline of FEF(25-75)/FVC in 10+ packyear smokers           | <a href="http://www.ncbi.nlm.nih.gov/projects/gap/cgi-bin/analysis.cgi?id=pha000020">http://www.ncbi.nlm.nih.gov/projects/gap/cgi-bin/analysis.cgi?id=pha000020</a> |
| Pulmonary | longitudinal     | fev1fvclong        | rate of decline of FEV1/FVC                                         | <a href="http://www.ncbi.nlm.nih.gov/projects/gap/cgi-bin/analysis.cgi?id=pha000022">http://www.ncbi.nlm.nih.gov/projects/gap/cgi-bin/analysis.cgi?id=pha000022</a> |
| Pulmonary | longitudinal     | fev1fvclongsmoke10 | rate of decline of FEV1/FVC in 10+ packyear smokers                 | <a href="http://www.ncbi.nlm.nih.gov/projects/gap/cgi-bin/analysis.cgi?id=pha000024">http://www.ncbi.nlm.nih.gov/projects/gap/cgi-bin/analysis.cgi?id=pha000024</a> |
| Pulmonary | longitudinal     | fev1long           | rate of decline of FEV1                                             | <a href="http://www.ncbi.nlm.nih.gov/projects/gap/cgi-bin/analysis.cgi?id=pha000026">http://www.ncbi.nlm.nih.gov/projects/gap/cgi-bin/analysis.cgi?id=pha000026</a> |
| Pulmonary | longitudinal     | fev1longsmoke10    | rate of decline of FEV1 in 10+ packyear smokers                     | <a href="http://www.ncbi.nlm.nih.gov/projects/gap/cgi-bin/analysis.cgi?id=pha000028">http://www.ncbi.nlm.nih.gov/projects/gap/cgi-bin/analysis.cgi?id=pha000028</a> |
| Pulmonary | longitudinal     | fvclong            | rate of decline of FVC                                              | <a href="http://www.ncbi.nlm.nih.gov/projects/gap/cgi-bin/analysis.cgi?id=pha000030">http://www.ncbi.nlm.nih.gov/projects/gap/cgi-bin/analysis.cgi?id=pha000030</a> |
| Pulmonary | longitudinal     | fvclongsmoke10     | rate of decline of FVC in 10+ packyear smokers                      | <a href="http://www.ncbi.nlm.nih.gov/projects/gap/cgi-bin/analysis.cgi?id=pha000032">http://www.ncbi.nlm.nih.gov/projects/gap/cgi-bin/analysis.cgi?id=pha000032</a> |
| Pulmonary | mean             | genomefev1         | mean FEV1 from 2 examinations                                       | <a href="http://www.ncbi.nlm.nih.gov/projects/gap/cgi-bin/analysis.cgi?id=pha000034">http://www.ncbi.nlm.nih.gov/projects/gap/cgi-bin/analysis.cgi?id=pha000034</a> |
| Pulmonary | mean             | genomefvc          | mean FVC from 2 examinations                                        | <a href="http://www.ncbi.nlm.nih.gov/projects/gap/cgi-bin/analysis.cgi?id=pha000036">http://www.ncbi.nlm.nih.gov/projects/gap/cgi-bin/analysis.cgi?id=pha000036</a> |
| Pulmonary | mean             | generatio          | mean FEV1/FVC from 2 examinations                                   | <a href="http://www.ncbi.nlm.nih.gov/projects/gap/cgi-bin/analysis.cgi?id=pha000038">http://www.ncbi.nlm.nih.gov/projects/gap/cgi-bin/analysis.cgi?id=pha000038</a> |
| Pulmonary | ppcrosssectional | ppfefadj           | percent predicted FEF(25-75) at latest exam                         | <a href="http://www.ncbi.nlm.nih.gov/projects/gap/cgi-bin/analysis.cgi?id=pha000040">http://www.ncbi.nlm.nih.gov/projects/gap/cgi-bin/analysis.cgi?id=pha000040</a> |
| Pulmonary | ppcrosssectional | ppfefadjsm10       | percent predicted FEF(25-75) at latest exam in 10+ packyear smokers | <a href="http://www.ncbi.nlm.nih.gov/projects/gap/cgi-bin/analysis.cgi?id=pha000042">http://www.ncbi.nlm.nih.gov/projects/gap/cgi-bin/analysis.cgi?id=pha000042</a> |
| Pulmonary | ppcrosssectional | ppfefratadj        | percent predicted FEF(25-75)/FVC at latest exam                     | <a href="http://www.ncbi.nlm.nih.gov/projects/gap/cgi-bin/analysis.cgi?id=pha000044">http://www.ncbi.nlm.nih.gov/projects/gap/cgi-bin/analysis.cgi?id=pha000044</a> |
| Pulmonary | ppcrosssectional | ppfefratadjsm10    | percent predicted FEF(25-75)/FVC latest exam, 10+ packyear smokers  | <a href="http://www.ncbi.nlm.nih.gov/projects/gap/cgi-bin/analysis.cgi?id=pha000046">http://www.ncbi.nlm.nih.gov/projects/gap/cgi-bin/analysis.cgi?id=pha000046</a> |
| Pulmonary | ppcrosssectional | ppfev1adj          | percent predicted FEV1 at latest exam                               | <a href="http://www.ncbi.nlm.nih.gov/projects/gap/cgi-bin/analysis.cgi?id=pha000048">http://www.ncbi.nlm.nih.gov/projects/gap/cgi-bin/analysis.cgi?id=pha000048</a> |
| Pulmonary | ppcrosssectional | ppfev1adjsm10      | percent predicted FEV1 at latest exam in 10+ packyear smokers       | <a href="http://www.ncbi.nlm.nih.gov/projects/gap/cgi-bin/analysis.cgi?id=pha000050">http://www.ncbi.nlm.nih.gov/projects/gap/cgi-bin/analysis.cgi?id=pha000050</a> |



Online Table 1: Phenotypes Evaluated for Association using Population-based Analysis (GEE)

| Group     | Category         | Trait Label      | Name                                                                       | GEE Link                                                                                                                                                            |
|-----------|------------------|------------------|----------------------------------------------------------------------------|---------------------------------------------------------------------------------------------------------------------------------------------------------------------|
| Pulmonary | ppcrosssectional | ppfvcadj         | percent predicted FVC at latest exam                                       | <a href="http://www.ncbi.nlm.nih.gov/projects/gap/cgi-bin/analysis.cgi?id=pha000052">http://www.ncbi.nlm.nih.gov/projects/gap/cgi-bin/analysis.cgi?id=pha000052</a> |
| Pulmonary | ppcrosssectional | ppfvcadjsm10     | percent predicted FVC at latest exam in 10+ packyear smokers               | <a href="http://www.ncbi.nlm.nih.gov/projects/gap/cgi-bin/analysis.cgi?id=pha000054">http://www.ncbi.nlm.nih.gov/projects/gap/cgi-bin/analysis.cgi?id=pha000054</a> |
| Pulmonary | ppcrosssectional | ppratioadj       | percent predicted FEV1/FVC at latest exam                                  | <a href="http://www.ncbi.nlm.nih.gov/projects/gap/cgi-bin/analysis.cgi?id=pha000056">http://www.ncbi.nlm.nih.gov/projects/gap/cgi-bin/analysis.cgi?id=pha000056</a> |
| Pulmonary | ppcrosssectional | ppratioadjsm10   | percent predicted FEV1/FVC at latest exam in 10+ packyear smokers          | <a href="http://www.ncbi.nlm.nih.gov/projects/gap/cgi-bin/analysis.cgi?id=pha000058">http://www.ncbi.nlm.nih.gov/projects/gap/cgi-bin/analysis.cgi?id=pha000058</a> |
| Pulmonary | rcrosssectional  | rfevadaj         | residual from predicted FEF(25-75) at latest exam                          | <a href="http://www.ncbi.nlm.nih.gov/projects/gap/cgi-bin/analysis.cgi?id=pha000060">http://www.ncbi.nlm.nih.gov/projects/gap/cgi-bin/analysis.cgi?id=pha000060</a> |
| Pulmonary | rcrosssectional  | rfevadajsm10     | residual from predicted FEF(25-75) at latest exam in 10+ packyear smokers  | <a href="http://www.ncbi.nlm.nih.gov/projects/gap/cgi-bin/analysis.cgi?id=pha000062">http://www.ncbi.nlm.nih.gov/projects/gap/cgi-bin/analysis.cgi?id=pha000062</a> |
| Pulmonary | rcrosssectional  | rfefratadj       | residual from predicted FEF(25-75)/FVC at latest exam                      | <a href="http://www.ncbi.nlm.nih.gov/projects/gap/cgi-bin/analysis.cgi?id=pha000064">http://www.ncbi.nlm.nih.gov/projects/gap/cgi-bin/analysis.cgi?id=pha000064</a> |
| Pulmonary | rcrosssectional  | rfefratadjsm10   | residual from predicted FEF(25-75)/FVC latest exam in 10+ packyear smokers | <a href="http://www.ncbi.nlm.nih.gov/projects/gap/cgi-bin/analysis.cgi?id=pha000066">http://www.ncbi.nlm.nih.gov/projects/gap/cgi-bin/analysis.cgi?id=pha000066</a> |
| Pulmonary | rcrosssectional  | rfev1adj         | residual from predicted FEV1 at latest exam                                | <a href="http://www.ncbi.nlm.nih.gov/projects/gap/cgi-bin/analysis.cgi?id=pha000068">http://www.ncbi.nlm.nih.gov/projects/gap/cgi-bin/analysis.cgi?id=pha000068</a> |
| Pulmonary | rcrosssectional  | rfev1adjsm10     | residual from predicted FEV1 at latest exam in 10+ packyear smokers        | <a href="http://www.ncbi.nlm.nih.gov/projects/gap/cgi-bin/analysis.cgi?id=pha000070">http://www.ncbi.nlm.nih.gov/projects/gap/cgi-bin/analysis.cgi?id=pha000070</a> |
| Pulmonary | rcrosssectional  | rvcadj           | residual from predicted FVC at latest exam                                 | <a href="http://www.ncbi.nlm.nih.gov/projects/gap/cgi-bin/analysis.cgi?id=pha000072">http://www.ncbi.nlm.nih.gov/projects/gap/cgi-bin/analysis.cgi?id=pha000072</a> |
| Pulmonary | rcrosssectional  | rvcadjsm10       | residual from predicted FVC at latest exam in 10+ packyear smokers         | <a href="http://www.ncbi.nlm.nih.gov/projects/gap/cgi-bin/analysis.cgi?id=pha000074">http://www.ncbi.nlm.nih.gov/projects/gap/cgi-bin/analysis.cgi?id=pha000074</a> |
| Pulmonary | rcrosssectional  | rratioadj        | residual from predicted FEV1/FVC at latest exam                            | <a href="http://www.ncbi.nlm.nih.gov/projects/gap/cgi-bin/analysis.cgi?id=pha000076">http://www.ncbi.nlm.nih.gov/projects/gap/cgi-bin/analysis.cgi?id=pha000076</a> |
| Pulmonary | rcrosssectional  | rratioadjsm10    | residual from predicted FEV1/FVC at latest exam in 10+ packyear smokers    | <a href="http://www.ncbi.nlm.nih.gov/projects/gap/cgi-bin/analysis.cgi?id=pha000078">http://www.ncbi.nlm.nih.gov/projects/gap/cgi-bin/analysis.cgi?id=pha000078</a> |
| Pulmonary | SDB              | rdiresid         | apnea-hypopnea index with 4% desaturation adjusted                         | <a href="http://www.ncbi.nlm.nih.gov/projects/gap/cgi-bin/analysis.cgi?id=pha000080">http://www.ncbi.nlm.nih.gov/projects/gap/cgi-bin/analysis.cgi?id=pha000080</a> |
| Pulmonary | singleexam       | ppfev1single     | percent predicted FEV1, exam: offspring 6, cohort 17                       | <a href="http://www.ncbi.nlm.nih.gov/projects/gap/cgi-bin/analysis.cgi?id=pha000082">http://www.ncbi.nlm.nih.gov/projects/gap/cgi-bin/analysis.cgi?id=pha000082</a> |
| Pulmonary | singleexam       | ppfvcsingle      | percent predicted FVC, exam: offspring 6, cohort 17                        | <a href="http://www.ncbi.nlm.nih.gov/projects/gap/cgi-bin/analysis.cgi?id=pha000084">http://www.ncbi.nlm.nih.gov/projects/gap/cgi-bin/analysis.cgi?id=pha000084</a> |
| Pulmonary | singleexam       | ppratiosingle    | percent predicted FEV1/FVC, exam: offspring 6, cohort 17                   | <a href="http://www.ncbi.nlm.nih.gov/projects/gap/cgi-bin/analysis.cgi?id=pha000086">http://www.ncbi.nlm.nih.gov/projects/gap/cgi-bin/analysis.cgi?id=pha000086</a> |
| Pulmonary | singleexam       | rfev1single      | residual from predicted FEV1, exam: offspring 6, cohort 17                 | <a href="http://www.ncbi.nlm.nih.gov/projects/gap/cgi-bin/analysis.cgi?id=pha000088">http://www.ncbi.nlm.nih.gov/projects/gap/cgi-bin/analysis.cgi?id=pha000088</a> |
| Pulmonary | singleexam       | rfvcsingle       | residual from predicted FVC, exam: offspring 6, cohort 17                  | <a href="http://www.ncbi.nlm.nih.gov/projects/gap/cgi-bin/analysis.cgi?id=pha000090">http://www.ncbi.nlm.nih.gov/projects/gap/cgi-bin/analysis.cgi?id=pha000090</a> |
| Pulmonary | singleexam       | rvcratiosingle   | residual from predicted FEV1/FVC, exam: offspring 6, cohort 17             | <a href="http://www.ncbi.nlm.nih.gov/projects/gap/cgi-bin/analysis.cgi?id=pha000092">http://www.ncbi.nlm.nih.gov/projects/gap/cgi-bin/analysis.cgi?id=pha000092</a> |
| Pulmonary | Sleepiness       | ess              | Epworth Sleepiness Scale, unadjusted                                       | <a href="http://www.ncbi.nlm.nih.gov/projects/gap/cgi-bin/analysis.cgi?id=pha000094">http://www.ncbi.nlm.nih.gov/projects/gap/cgi-bin/analysis.cgi?id=pha000094</a> |
| Pulmonary | Sleepiness       | essresid1        | Epworth Sleepiness Scale, adjusted A                                       | <a href="http://www.ncbi.nlm.nih.gov/projects/gap/cgi-bin/analysis.cgi?id=pha000096">http://www.ncbi.nlm.nih.gov/projects/gap/cgi-bin/analysis.cgi?id=pha000096</a> |
| Pulmonary | Sleepiness       | essresid2        | Epworth Sleepiness Scale, adjusted B                                       | <a href="http://www.ncbi.nlm.nih.gov/projects/gap/cgi-bin/analysis.cgi?id=pha000098">http://www.ncbi.nlm.nih.gov/projects/gap/cgi-bin/analysis.cgi?id=pha000098</a> |
| Pulmonary | Sleepiness       | essresid3        | Epworth Sleepiness Scale, adjusted C                                       | <a href="http://www.ncbi.nlm.nih.gov/projects/gap/cgi-bin/analysis.cgi?id=pha000100">http://www.ncbi.nlm.nih.gov/projects/gap/cgi-bin/analysis.cgi?id=pha000100</a> |
| RENALENDO | ENDO             | DHEASAS3         | DHEAS adjusted for age and sex                                             | <a href="http://www.ncbi.nlm.nih.gov/projects/gap/cgi-bin/analysis.cgi?id=pha001220">http://www.ncbi.nlm.nih.gov/projects/gap/cgi-bin/analysis.cgi?id=pha001220</a> |
| RENALENDO | ENDO             | DHEASMV3         | DHEAS MV adjusted                                                          | <a href="http://www.ncbi.nlm.nih.gov/projects/gap/cgi-bin/analysis.cgi?id=pha001222">http://www.ncbi.nlm.nih.gov/projects/gap/cgi-bin/analysis.cgi?id=pha001222</a> |
| RENALENDO | ENDO             | FSHAS3           | FSH in men or post meno women no hormones, age-sex adjusted                | <a href="http://www.ncbi.nlm.nih.gov/projects/gap/cgi-bin/analysis.cgi?id=pha001224">http://www.ncbi.nlm.nih.gov/projects/gap/cgi-bin/analysis.cgi?id=pha001224</a> |
| RENALENDO | ENDO             | FSHMV3           | FSH in men or post meno women no hormones, MV adjusted                     | <a href="http://www.ncbi.nlm.nih.gov/projects/gap/cgi-bin/analysis.cgi?id=pha001226">http://www.ncbi.nlm.nih.gov/projects/gap/cgi-bin/analysis.cgi?id=pha001226</a> |
| RENALENDO | ENDO             | LHAS3            | LH in men or post-meno women no hormones, age-sex adjusted                 | <a href="http://www.ncbi.nlm.nih.gov/projects/gap/cgi-bin/analysis.cgi?id=pha001228">http://www.ncbi.nlm.nih.gov/projects/gap/cgi-bin/analysis.cgi?id=pha001228</a> |
| RENALENDO | ENDO             | LHMV3            | LH in men or post-meno women no hormones, MV adjusted                      | <a href="http://www.ncbi.nlm.nih.gov/projects/gap/cgi-bin/analysis.cgi?id=pha001230">http://www.ncbi.nlm.nih.gov/projects/gap/cgi-bin/analysis.cgi?id=pha001230</a> |
| RENALENDO | ENDO             | TSHLNAS3         | TSH from ex3 log transformed, age-sex adjusted                             | <a href="http://www.ncbi.nlm.nih.gov/projects/gap/cgi-bin/analysis.cgi?id=pha001232">http://www.ncbi.nlm.nih.gov/projects/gap/cgi-bin/analysis.cgi?id=pha001232</a> |
| RENALENDO | ENDO             | TSHLNAS4         | TSH from ex4 log transformed, age-sex adjusted                             | <a href="http://www.ncbi.nlm.nih.gov/projects/gap/cgi-bin/analysis.cgi?id=pha001234">http://www.ncbi.nlm.nih.gov/projects/gap/cgi-bin/analysis.cgi?id=pha001234</a> |
| RENALENDO | ENDO             | TSHLNMV3         | TSH ex3 log transformed, MV adjusted                                       | <a href="http://www.ncbi.nlm.nih.gov/projects/gap/cgi-bin/analysis.cgi?id=pha001236">http://www.ncbi.nlm.nih.gov/projects/gap/cgi-bin/analysis.cgi?id=pha001236</a> |
| RENALENDO | ENDO             | TSHLNMV4         | TSH ex4 log transformed, MV adjusted                                       | <a href="http://www.ncbi.nlm.nih.gov/projects/gap/cgi-bin/analysis.cgi?id=pha001238">http://www.ncbi.nlm.nih.gov/projects/gap/cgi-bin/analysis.cgi?id=pha001238</a> |
| RENALENDO | ENDO             | TSHMEAN34LNAS    | Mean TSH log transformed, mean of ex3 and ex4, age sex adjusted            | <a href="http://www.ncbi.nlm.nih.gov/projects/gap/cgi-bin/analysis.cgi?id=pha001240">http://www.ncbi.nlm.nih.gov/projects/gap/cgi-bin/analysis.cgi?id=pha001240</a> |
| RENALENDO | ENDO             | TSHMEAN34LNMV    | Mean TSH ex3 and 4, MV adjusted                                            | <a href="http://www.ncbi.nlm.nih.gov/projects/gap/cgi-bin/analysis.cgi?id=pha001242">http://www.ncbi.nlm.nih.gov/projects/gap/cgi-bin/analysis.cgi?id=pha001242</a> |
| RENALENDO | RENAL            | CALCIUMAS2       | Calcium, ex2, age-sex adjusted                                             | <a href="http://www.ncbi.nlm.nih.gov/projects/gap/cgi-bin/analysis.cgi?id=pha001244">http://www.ncbi.nlm.nih.gov/projects/gap/cgi-bin/analysis.cgi?id=pha001244</a> |
| RENALENDO | RENAL            | CALCIUMMV2       | Calcium, ex2, age-sex-creatinine adjusted                                  | <a href="http://www.ncbi.nlm.nih.gov/projects/gap/cgi-bin/analysis.cgi?id=pha001246">http://www.ncbi.nlm.nih.gov/projects/gap/cgi-bin/analysis.cgi?id=pha001246</a> |
| RENALENDO | RENAL            | CHNGSCR27ASWIN   | Change in creatinine ex2 to 7, age-sex adjusted                            | <a href="http://www.ncbi.nlm.nih.gov/projects/gap/cgi-bin/analysis.cgi?id=pha001248">http://www.ncbi.nlm.nih.gov/projects/gap/cgi-bin/analysis.cgi?id=pha001248</a> |
| RENALENDO | RENAL            | CHNGSCR27MVWIN   | Change in creatinine ex2 to 7, MV adjusted                                 | <a href="http://www.ncbi.nlm.nih.gov/projects/gap/cgi-bin/analysis.cgi?id=pha001250">http://www.ncbi.nlm.nih.gov/projects/gap/cgi-bin/analysis.cgi?id=pha001250</a> |
| RENALENDO | RENAL            | CKDAS7           | CKD ex 7, age-sex adjusted                                                 | <a href="http://www.ncbi.nlm.nih.gov/projects/gap/cgi-bin/analysis.cgi?id=pha001252">http://www.ncbi.nlm.nih.gov/projects/gap/cgi-bin/analysis.cgi?id=pha001252</a> |
| RENALENDO | RENAL            | CKDMV7           | CKD ex 7, MV adjusted                                                      | <a href="http://www.ncbi.nlm.nih.gov/projects/gap/cgi-bin/analysis.cgi?id=pha001254">http://www.ncbi.nlm.nih.gov/projects/gap/cgi-bin/analysis.cgi?id=pha001254</a> |
| RENALENDO | RENAL            | CYSCAS7          | Cystatin C, ex 7, age-sex adjusted                                         | <a href="http://www.ncbi.nlm.nih.gov/projects/gap/cgi-bin/analysis.cgi?id=pha001328">http://www.ncbi.nlm.nih.gov/projects/gap/cgi-bin/analysis.cgi?id=pha001328</a> |
| RENALENDO | RENAL            | CYSCMV7          | Cystatin C, ex 7, MV adjusted                                              | <a href="http://www.ncbi.nlm.nih.gov/projects/gap/cgi-bin/analysis.cgi?id=pha001330">http://www.ncbi.nlm.nih.gov/projects/gap/cgi-bin/analysis.cgi?id=pha001330</a> |
| RENALENDO | RENAL            | GFRAS5           | GFR ex 5, age-sex adjusted                                                 | <a href="http://www.ncbi.nlm.nih.gov/projects/gap/cgi-bin/analysis.cgi?id=pha001256">http://www.ncbi.nlm.nih.gov/projects/gap/cgi-bin/analysis.cgi?id=pha001256</a> |
| RENALENDO | RENAL            | GFRAS6           | GFR ex 6, age-sex adjusted                                                 | <a href="http://www.ncbi.nlm.nih.gov/projects/gap/cgi-bin/analysis.cgi?id=pha001258">http://www.ncbi.nlm.nih.gov/projects/gap/cgi-bin/analysis.cgi?id=pha001258</a> |
| RENALENDO | RENAL            | GFRAS7           | GFR ex 7, age-sex adjusted                                                 | <a href="http://www.ncbi.nlm.nih.gov/projects/gap/cgi-bin/analysis.cgi?id=pha001260">http://www.ncbi.nlm.nih.gov/projects/gap/cgi-bin/analysis.cgi?id=pha001260</a> |
| RENALENDO | RENAL            | GFRASWIN2        | GFR ex2, winsorized, age-sex adjusted                                      | <a href="http://www.ncbi.nlm.nih.gov/projects/gap/cgi-bin/analysis.cgi?id=pha001262">http://www.ncbi.nlm.nih.gov/projects/gap/cgi-bin/analysis.cgi?id=pha001262</a> |
| RENALENDO | RENAL            | GFRMV5           | GFR ex5, MV adjusted                                                       | <a href="http://www.ncbi.nlm.nih.gov/projects/gap/cgi-bin/analysis.cgi?id=pha001264">http://www.ncbi.nlm.nih.gov/projects/gap/cgi-bin/analysis.cgi?id=pha001264</a> |
| RENALENDO | RENAL            | GFRMV6           | GFR ex6, MV adjusted                                                       | <a href="http://www.ncbi.nlm.nih.gov/projects/gap/cgi-bin/analysis.cgi?id=pha001266">http://www.ncbi.nlm.nih.gov/projects/gap/cgi-bin/analysis.cgi?id=pha001266</a> |
| RENALENDO | RENAL            | GFRMV7           | GFR ex7, MV adjusted                                                       | <a href="http://www.ncbi.nlm.nih.gov/projects/gap/cgi-bin/analysis.cgi?id=pha001268">http://www.ncbi.nlm.nih.gov/projects/gap/cgi-bin/analysis.cgi?id=pha001268</a> |
| RENALENDO | RENAL            | GFRMVWIN2        | GFR ex2, winsorized, MV adjusted                                           | <a href="http://www.ncbi.nlm.nih.gov/projects/gap/cgi-bin/analysis.cgi?id=pha001270">http://www.ncbi.nlm.nih.gov/projects/gap/cgi-bin/analysis.cgi?id=pha001270</a> |
| RENALENDO | RENAL            | MeanGFRAS2567WIN | Mean GFR ex 2,5,6,7 age-sex adjusted                                       | <a href="http://www.ncbi.nlm.nih.gov/projects/gap/cgi-bin/analysis.cgi?id=pha001272">http://www.ncbi.nlm.nih.gov/projects/gap/cgi-bin/analysis.cgi?id=pha001272</a> |
| RENALENDO | RENAL            | MeanGFRMV2567WIN | Mean GFR ex 2,5,6,7,MV adjusted                                            | <a href="http://www.ncbi.nlm.nih.gov/projects/gap/cgi-bin/analysis.cgi?id=pha001274">http://www.ncbi.nlm.nih.gov/projects/gap/cgi-bin/analysis.cgi?id=pha001274</a> |

Online Table 1: Phenotypes Evaluated for Association using Population-based Analysis (GEE)

| Group      | Category            | Trait Label        | Name                                                                            | GEE Link                                                                                                                                                            |
|------------|---------------------|--------------------|---------------------------------------------------------------------------------|---------------------------------------------------------------------------------------------------------------------------------------------------------------------|
| RENALEND   | RENAL               | MeanSCR2567LNASWIN | Mean creatinine ex 2,5,6,7 age-sex adjusted                                     | <a href="http://www.ncbi.nlm.nih.gov/projects/gap/cgi-bin/analysis.cgi?id=pha001276">http://www.ncbi.nlm.nih.gov/projects/gap/cgi-bin/analysis.cgi?id=pha001276</a> |
| RENALEND   | RENAL               | MeanSCR2567LNMVWIN | Mean creatinine ex 2,5,6,7, MV adjusted                                         | <a href="http://www.ncbi.nlm.nih.gov/projects/gap/cgi-bin/analysis.cgi?id=pha001278">http://www.ncbi.nlm.nih.gov/projects/gap/cgi-bin/analysis.cgi?id=pha001278</a> |
| RENALEND   | RENAL               | MeanURICACID12AS   | Mean uric acid, ex 1 and 2, age-sex adjusted                                    | <a href="http://www.ncbi.nlm.nih.gov/projects/gap/cgi-bin/analysis.cgi?id=pha001280">http://www.ncbi.nlm.nih.gov/projects/gap/cgi-bin/analysis.cgi?id=pha001280</a> |
| RENALEND   | RENAL               | MeanURICACID12MV   | Mean uric acid, ex 1 and 2, MV adjusted                                         | <a href="http://www.ncbi.nlm.nih.gov/projects/gap/cgi-bin/analysis.cgi?id=pha001282">http://www.ncbi.nlm.nih.gov/projects/gap/cgi-bin/analysis.cgi?id=pha001282</a> |
| RENALEND   | RENAL               | PHOSAS2            | Phos, ex 2, age-sex adjusted                                                    | <a href="http://www.ncbi.nlm.nih.gov/projects/gap/cgi-bin/analysis.cgi?id=pha001284">http://www.ncbi.nlm.nih.gov/projects/gap/cgi-bin/analysis.cgi?id=pha001284</a> |
| RENALEND   | RENAL               | PHOSMV2            | Phos, ex 2, MV adjusted                                                         | <a href="http://www.ncbi.nlm.nih.gov/projects/gap/cgi-bin/analysis.cgi?id=pha001286">http://www.ncbi.nlm.nih.gov/projects/gap/cgi-bin/analysis.cgi?id=pha001286</a> |
| RENALEND   | RENAL               | SCRLNAS5           | Creatinine, ex5, age-sex adjusted                                               | <a href="http://www.ncbi.nlm.nih.gov/projects/gap/cgi-bin/analysis.cgi?id=pha001288">http://www.ncbi.nlm.nih.gov/projects/gap/cgi-bin/analysis.cgi?id=pha001288</a> |
| RENALEND   | RENAL               | SCRLNAS6           | Creatinine, ex6, age-sex adjusted                                               | <a href="http://www.ncbi.nlm.nih.gov/projects/gap/cgi-bin/analysis.cgi?id=pha001290">http://www.ncbi.nlm.nih.gov/projects/gap/cgi-bin/analysis.cgi?id=pha001290</a> |
| RENALEND   | RENAL               | SCRLNASWIN2        | Creatinine ex2, log transformed and winsorized, age-sex adjusted                | <a href="http://www.ncbi.nlm.nih.gov/projects/gap/cgi-bin/analysis.cgi?id=pha001292">http://www.ncbi.nlm.nih.gov/projects/gap/cgi-bin/analysis.cgi?id=pha001292</a> |
| RENALEND   | RENAL               | SCRLNASWIN7        | Creatinine ex7, log transformed and winsorized, age-sex adjusted                | <a href="http://www.ncbi.nlm.nih.gov/projects/gap/cgi-bin/analysis.cgi?id=pha001294">http://www.ncbi.nlm.nih.gov/projects/gap/cgi-bin/analysis.cgi?id=pha001294</a> |
| RENALEND   | RENAL               | SCRLNMV5           | GFR ex 5 uncalibrated creatinine, MV adjusted                                   | <a href="http://www.ncbi.nlm.nih.gov/projects/gap/cgi-bin/analysis.cgi?id=pha001296">http://www.ncbi.nlm.nih.gov/projects/gap/cgi-bin/analysis.cgi?id=pha001296</a> |
| RENALEND   | RENAL               | SCRLNMV6           | GFR ex 6 uncalibrated creatinine, MV adjusted                                   | <a href="http://www.ncbi.nlm.nih.gov/projects/gap/cgi-bin/analysis.cgi?id=pha001298">http://www.ncbi.nlm.nih.gov/projects/gap/cgi-bin/analysis.cgi?id=pha001298</a> |
| RENALEND   | RENAL               | SCRLNMVWIN2        | Creatinine ex 2 log transformed winsorized MV adjusted                          | <a href="http://www.ncbi.nlm.nih.gov/projects/gap/cgi-bin/analysis.cgi?id=pha001300">http://www.ncbi.nlm.nih.gov/projects/gap/cgi-bin/analysis.cgi?id=pha001300</a> |
| RENALEND   | RENAL               | SCRLNMVWIN7        | Creatinine ex 7 uncalibrated MV adjusted                                        | <a href="http://www.ncbi.nlm.nih.gov/projects/gap/cgi-bin/analysis.cgi?id=pha001302">http://www.ncbi.nlm.nih.gov/projects/gap/cgi-bin/analysis.cgi?id=pha001302</a> |
| RENALEND   | RENAL               | UAEGE30HTNAS6      | UAE of at least 30 in enriched hypertensive sample, age-sex adjusted            | <a href="http://www.ncbi.nlm.nih.gov/projects/gap/cgi-bin/analysis.cgi?id=pha001304">http://www.ncbi.nlm.nih.gov/projects/gap/cgi-bin/analysis.cgi?id=pha001304</a> |
| RENALEND   | RENAL               | UAEGE30HTNMV6      | UAE of at least 30 in enriched hypertensive sample, age-sex adjusted            | <a href="http://www.ncbi.nlm.nih.gov/projects/gap/cgi-bin/analysis.cgi?id=pha001306">http://www.ncbi.nlm.nih.gov/projects/gap/cgi-bin/analysis.cgi?id=pha001306</a> |
| RENALEND   | RENAL               | UAE LNAS6          | Log-transformed UAE, age-sex adjusted                                           | <a href="http://www.ncbi.nlm.nih.gov/projects/gap/cgi-bin/analysis.cgi?id=pha001308">http://www.ncbi.nlm.nih.gov/projects/gap/cgi-bin/analysis.cgi?id=pha001308</a> |
| RENALEND   | RENAL               | UAE LNHTNAS6       | Log-transformed UAE in HTN enriched sample, age-sex adjusted                    | <a href="http://www.ncbi.nlm.nih.gov/projects/gap/cgi-bin/analysis.cgi?id=pha001310">http://www.ncbi.nlm.nih.gov/projects/gap/cgi-bin/analysis.cgi?id=pha001310</a> |
| RENALEND   | RENAL               | UAE LNHTNMV6       | Log-transformed UAE in HTN enriched sample, MV adjusted                         | <a href="http://www.ncbi.nlm.nih.gov/projects/gap/cgi-bin/analysis.cgi?id=pha001312">http://www.ncbi.nlm.nih.gov/projects/gap/cgi-bin/analysis.cgi?id=pha001312</a> |
| RENALEND   | RENAL               | UAE LN MV6         | Log-transformed UAE, MV adjusted                                                | <a href="http://www.ncbi.nlm.nih.gov/projects/gap/cgi-bin/analysis.cgi?id=pha001314">http://www.ncbi.nlm.nih.gov/projects/gap/cgi-bin/analysis.cgi?id=pha001314</a> |
| RENALEND   | RENAL               | UNALNASWIN6        | Urinary sodium, age-sex adjusted                                                | <a href="http://www.ncbi.nlm.nih.gov/projects/gap/cgi-bin/analysis.cgi?id=pha001316">http://www.ncbi.nlm.nih.gov/projects/gap/cgi-bin/analysis.cgi?id=pha001316</a> |
| RENALEND   | RENAL               | UNALNMVWIN6        | Urinary sodium, MV adjusted                                                     | <a href="http://www.ncbi.nlm.nih.gov/projects/gap/cgi-bin/analysis.cgi?id=pha001318">http://www.ncbi.nlm.nih.gov/projects/gap/cgi-bin/analysis.cgi?id=pha001318</a> |
| RENALEND   | RENAL               | URICACIDAS1        | Uric acid, ex 1, age-sex adjusted                                               | <a href="http://www.ncbi.nlm.nih.gov/projects/gap/cgi-bin/analysis.cgi?id=pha001320">http://www.ncbi.nlm.nih.gov/projects/gap/cgi-bin/analysis.cgi?id=pha001320</a> |
| RENALEND   | RENAL               | URICACIDAS2        | Uric acid, ex 2, age-sex adjusted                                               | <a href="http://www.ncbi.nlm.nih.gov/projects/gap/cgi-bin/analysis.cgi?id=pha001322">http://www.ncbi.nlm.nih.gov/projects/gap/cgi-bin/analysis.cgi?id=pha001322</a> |
| RENALEND   | RENAL               | URICACIDMV1        | Uric acid, ex1, MV adjusted                                                     | <a href="http://www.ncbi.nlm.nih.gov/projects/gap/cgi-bin/analysis.cgi?id=pha001324">http://www.ncbi.nlm.nih.gov/projects/gap/cgi-bin/analysis.cgi?id=pha001324</a> |
| RENALEND   | RENAL               | URICACIDMV2        | Uric acid, ex2, MV adjusted                                                     | <a href="http://www.ncbi.nlm.nih.gov/projects/gap/cgi-bin/analysis.cgi?id=pha001326">http://www.ncbi.nlm.nih.gov/projects/gap/cgi-bin/analysis.cgi?id=pha001326</a> |
| SubclinCVD | Ankle-brachialindex | RANKLEBI6          | Ankle-brachial index, cycle 6, age and sex-djusted                              | <a href="http://www.ncbi.nlm.nih.gov/projects/gap/cgi-bin/analysis.cgi?id=pha000928">http://www.ncbi.nlm.nih.gov/projects/gap/cgi-bin/analysis.cgi?id=pha000928</a> |
| SubclinCVD | Ankle-brachialindex | RANKLEBI6MV        | Ankle-brachial index, cycle 6, multivariable-adjusted                           | <a href="http://www.ncbi.nlm.nih.gov/projects/gap/cgi-bin/analysis.cgi?id=pha000930">http://www.ncbi.nlm.nih.gov/projects/gap/cgi-bin/analysis.cgi?id=pha000930</a> |
| SubclinCVD | Ankle-brachialindex | RANKLEBI7          | Ankle-brachial index, cycle 7, age- and sex-adjusted                            | <a href="http://www.ncbi.nlm.nih.gov/projects/gap/cgi-bin/analysis.cgi?id=pha000932">http://www.ncbi.nlm.nih.gov/projects/gap/cgi-bin/analysis.cgi?id=pha000932</a> |
| SubclinCVD | Ankle-brachialindex | RANKLEBI7MV        | Ankle-brachial index, cycle 7, multivariable-adjusted                           | <a href="http://www.ncbi.nlm.nih.gov/projects/gap/cgi-bin/analysis.cgi?id=pha000934">http://www.ncbi.nlm.nih.gov/projects/gap/cgi-bin/analysis.cgi?id=pha000934</a> |
| SubclinCVD | BrainMRI            | BMRILWMHVC         | Log white matter hyperintensity to intracranial volume ratio, age and sex       | <a href="http://www.ncbi.nlm.nih.gov/projects/gap/cgi-bin/analysis.cgi?id=pha000936">http://www.ncbi.nlm.nih.gov/projects/gap/cgi-bin/analysis.cgi?id=pha000936</a> |
| SubclinCVD | BrainMRI            | BMRILWMHVMV        | Log white matter hyperintensity to intracranial volume ratio, multivariable     | <a href="http://www.ncbi.nlm.nih.gov/projects/gap/cgi-bin/analysis.cgi?id=pha000938">http://www.ncbi.nlm.nih.gov/projects/gap/cgi-bin/analysis.cgi?id=pha000938</a> |
| SubclinCVD | BrainMRI            | BMRIZLWMHVC        | Z-score log white matter hyperintensity volume ratio, sex adjusted              | <a href="http://www.ncbi.nlm.nih.gov/projects/gap/cgi-bin/analysis.cgi?id=pha000940">http://www.ncbi.nlm.nih.gov/projects/gap/cgi-bin/analysis.cgi?id=pha000940</a> |
| SubclinCVD | BrainMRI            | BMRIZLWMHVMV       | Z-score log white matter hyperintensity volume ratio, multivariable             | <a href="http://www.ncbi.nlm.nih.gov/projects/gap/cgi-bin/analysis.cgi?id=pha000942">http://www.ncbi.nlm.nih.gov/projects/gap/cgi-bin/analysis.cgi?id=pha000942</a> |
| SubclinCVD | Carotid             | RNKCAROTBULBAS6    | Carotid bulb IMT mean max, cycle 6, log transformed age and sex-adjusted        | <a href="http://www.ncbi.nlm.nih.gov/projects/gap/cgi-bin/analysis.cgi?id=pha000944">http://www.ncbi.nlm.nih.gov/projects/gap/cgi-bin/analysis.cgi?id=pha000944</a> |
| SubclinCVD | Carotid             | RNKCAROTBULBMV6    | Carotid bulb IMT mean max, cycle 6, log transformed multivariable-adjusted      | <a href="http://www.ncbi.nlm.nih.gov/projects/gap/cgi-bin/analysis.cgi?id=pha000946">http://www.ncbi.nlm.nih.gov/projects/gap/cgi-bin/analysis.cgi?id=pha000946</a> |
| SubclinCVD | Carotid             | RNKCAROTCCAMAXAS6  | Common carotid IMT mean max, cycle 6, log transformed age and sex-adjusted      | <a href="http://www.ncbi.nlm.nih.gov/projects/gap/cgi-bin/analysis.cgi?id=pha000948">http://www.ncbi.nlm.nih.gov/projects/gap/cgi-bin/analysis.cgi?id=pha000948</a> |
| SubclinCVD | Carotid             | RNKCAROTCCAMAXMV6  | Common carotid IMT mean max, cycle 6, log transformed multivariable-adjusted    | <a href="http://www.ncbi.nlm.nih.gov/projects/gap/cgi-bin/analysis.cgi?id=pha000950">http://www.ncbi.nlm.nih.gov/projects/gap/cgi-bin/analysis.cgi?id=pha000950</a> |
| SubclinCVD | Carotid             | RNKCAROTCCAMEANAS6 | Common carotid IMT mean mean, cycle 6, log transformed age and sex-adjusted     | <a href="http://www.ncbi.nlm.nih.gov/projects/gap/cgi-bin/analysis.cgi?id=pha000952">http://www.ncbi.nlm.nih.gov/projects/gap/cgi-bin/analysis.cgi?id=pha000952</a> |
| SubclinCVD | Carotid             | RNKCAROTCCAMEANMV6 | Common carotid IMT mean mean, cycle 6, log transformed multivariable-adjusted   | <a href="http://www.ncbi.nlm.nih.gov/projects/gap/cgi-bin/analysis.cgi?id=pha000954">http://www.ncbi.nlm.nih.gov/projects/gap/cgi-bin/analysis.cgi?id=pha000954</a> |
| SubclinCVD | Carotid             | RNKCAROTICAMAXAS6  | Internal carotid IMT mean max, cycle 6, log transformed age and sex-adjusted    | <a href="http://www.ncbi.nlm.nih.gov/projects/gap/cgi-bin/analysis.cgi?id=pha000956">http://www.ncbi.nlm.nih.gov/projects/gap/cgi-bin/analysis.cgi?id=pha000956</a> |
| SubclinCVD | Carotid             | RNKCAROTICAMAXMV6  | Internal carotid IMT mean max, cycle 6, log transformed multivariable-adjusted  | <a href="http://www.ncbi.nlm.nih.gov/projects/gap/cgi-bin/analysis.cgi?id=pha000958">http://www.ncbi.nlm.nih.gov/projects/gap/cgi-bin/analysis.cgi?id=pha000958</a> |
| SubclinCVD | Carotid             | RNKCAROTICAMEANAS6 | Internal carotid IMT mean mean, cycle 6, log transformed age and sex-adjusted   | <a href="http://www.ncbi.nlm.nih.gov/projects/gap/cgi-bin/analysis.cgi?id=pha000960">http://www.ncbi.nlm.nih.gov/projects/gap/cgi-bin/analysis.cgi?id=pha000960</a> |
| SubclinCVD | Carotid             | RNKCAROTICAMEANMV6 | Internal carotid IMT mean mean, cycle 6, log transformed multivariable-adjusted | <a href="http://www.ncbi.nlm.nih.gov/projects/gap/cgi-bin/analysis.cgi?id=pha000962">http://www.ncbi.nlm.nih.gov/projects/gap/cgi-bin/analysis.cgi?id=pha000962</a> |
| SubclinCVD | Carotid             | RNKCAROTSTENAS6    | Maximum Carotid Stenosis, cycle 6, age and sex-adjusted                         | <a href="http://www.ncbi.nlm.nih.gov/projects/gap/cgi-bin/analysis.cgi?id=pha000964">http://www.ncbi.nlm.nih.gov/projects/gap/cgi-bin/analysis.cgi?id=pha000964</a> |
| SubclinCVD | Carotid             | RNKCAROTSTENMV6    | Maximum Carotid Stenosis, cycle 6 multivariable-adjusted                        | <a href="http://www.ncbi.nlm.nih.gov/projects/gap/cgi-bin/analysis.cgi?id=pha000966">http://www.ncbi.nlm.nih.gov/projects/gap/cgi-bin/analysis.cgi?id=pha000966</a> |
| SubclinCVD | CT                  | RESMDCTAACAS7      | Mean Agatston AAC score, MDCT ~cycle 7, log transform, age and sex-adjusted     | <a href="http://www.ncbi.nlm.nih.gov/projects/gap/cgi-bin/analysis.cgi?id=pha000968">http://www.ncbi.nlm.nih.gov/projects/gap/cgi-bin/analysis.cgi?id=pha000968</a> |
| SubclinCVD | CT                  | RESMDCTAACMV7      | Mean Agatston AAC score, MDCT ~cycle 7, log transform multivariable-adjusted    | <a href="http://www.ncbi.nlm.nih.gov/projects/gap/cgi-bin/analysis.cgi?id=pha000970">http://www.ncbi.nlm.nih.gov/projects/gap/cgi-bin/analysis.cgi?id=pha000970</a> |
| SubclinCVD | CT                  | RESMDCTCACAS7      | Mean Agatston CAC score, MDCT ~cycle 7, log transform age and sex-adjusted      | <a href="http://www.ncbi.nlm.nih.gov/projects/gap/cgi-bin/analysis.cgi?id=pha000972">http://www.ncbi.nlm.nih.gov/projects/gap/cgi-bin/analysis.cgi?id=pha000972</a> |
| SubclinCVD | CT                  | RESMDCTCACMAXAS7   | Max Agatston CAC score, MDCT ~cycle 7, log transform age and sex-adjusted       | <a href="http://www.ncbi.nlm.nih.gov/projects/gap/cgi-bin/analysis.cgi?id=pha000974">http://www.ncbi.nlm.nih.gov/projects/gap/cgi-bin/analysis.cgi?id=pha000974</a> |
| SubclinCVD | CT                  | RESMDCTCACMAXMV7   | Max Agatston CAC score, MDCT ~cycle 7, log transform multivariable-adjusted     | <a href="http://www.ncbi.nlm.nih.gov/projects/gap/cgi-bin/analysis.cgi?id=pha000976">http://www.ncbi.nlm.nih.gov/projects/gap/cgi-bin/analysis.cgi?id=pha000976</a> |
| SubclinCVD | CT                  | RESMDCTCACMV7      | Mean Agatston CAC score, MDCT ~cycle 7, log transform multivariable-adjusted    | <a href="http://www.ncbi.nlm.nih.gov/projects/gap/cgi-bin/analysis.cgi?id=pha000978">http://www.ncbi.nlm.nih.gov/projects/gap/cgi-bin/analysis.cgi?id=pha000978</a> |
